# Supplementary material for: Synthesis of ciprofloxacin-linked 1,2,3-triazole conjugates as potent antibacterial agents using click chemistry: exploring their function as DNA gyrase inhibitors via in silico- and in vitro-based studies
Source: Royal Society of Chemistry journal article supplement (doi:10.1039/d4ra01332h), 2024-01-01
Supplement: d4ra01332h1.pdf [file d4ra01332h1.pdf]

## Supplementary Data

### Synthesis of ciprofloxacin linked 1,2,3-triazole conjugates as potent antibacterial agents using click chemistry: Exploring the mechanistic insights as DNA gyrase inhibitors via *in silico* and *in vitro* based studies

Upendra Kumar Patel, <sup>a</sup> Punit Tiwari, <sup>b</sup> Ragini Tilak, <sup>b</sup> Gaurav Joshi, <sup>c</sup> Roshan Kumar, <sup>d</sup> Alka Agarwal<sup>a\*</sup>

<sup>a</sup>Department of Medicinal Chemistry, Institute of Medical Sciences, Banaras Hindu University, Varanasi, UP-221005, India.

<sup>b</sup>Department of Microbiology, Institute of Medical Sciences, Banaras Hindu University, Varanasi, UP-221005, India.

<sup>c</sup>Department of Pharmaceutical Sciences, Hemvati Nandan Bahuguna Garhwal University (Central University) Srinagar – 246174, Dist. Garhwal (Uttarakhand), India

<sup>d</sup>Department of Microbiology, Central University of Punjab, Ghudda, Bathinda-151401, India.

#### \*Corresponding Author

Prof. Alka Agarwal

Department of Medicinal Chemistry

Institute of medical sciences

Banaras Hindu University

Varanasi, 221005, U.P. India.

Email: [agarwal.dralka@gmail.com](mailto:agarwal.dralka@gmail.com)

| LIST OF CONTENTS:                                                            | page no. |
|------------------------------------------------------------------------------|----------|
| 1. General Information                                                       | 2        |
| 2. <sup>1</sup> H, <sup>13</sup> C, <sup>19</sup> F NMR, IR and Mass spectra | 3        |

All the chemicals and solvents used in the current study have been purchased from E. Merck (India) and Sigma-Aldrich. On precoated silica gel 60 F254 (mesh), the reactions during synthesis were monitored via thin layer chromatography (TLC), and spots were visualized using UV light. Silica gel (60–120 mesh) was employed for column chromatography. Melting points of all synthesized compounds were determined by using an open capillary method and may be uncorrected. The structural assignments of the synthesized products were based on <sup>1</sup>H NMR, <sup>13</sup>C & <sup>19</sup>F NMR, HRMS, IR and single-crystal XRD. NMR data were collected using 400 MHz, JEOL JNM-ECS spectrometer in DMSO-d<sub>6</sub> and CDCl<sub>3</sub> using TMS as an internal standard and Delta software to process the data. In reporting spectra, abbreviations such as s= singlet, bs = broad singlet, d= doublet, dd= doublet of doublets, t= triplet, and m= multiple were used. Mass data was produced with the use of a Bruker Compass spectrometer. X-ray analysis was performed using Rigaku XtaLAB Synergy-i Single Crystal X-ray Diffractometer with a CCD detector (HyPix-Bantam) using graphite mono-chromatized Cu-K $\alpha$  radiation ( $\lambda = 1.54184 \text{ \AA}$ ).

# <sup>1</sup>H-NMR spectrum of compound 2

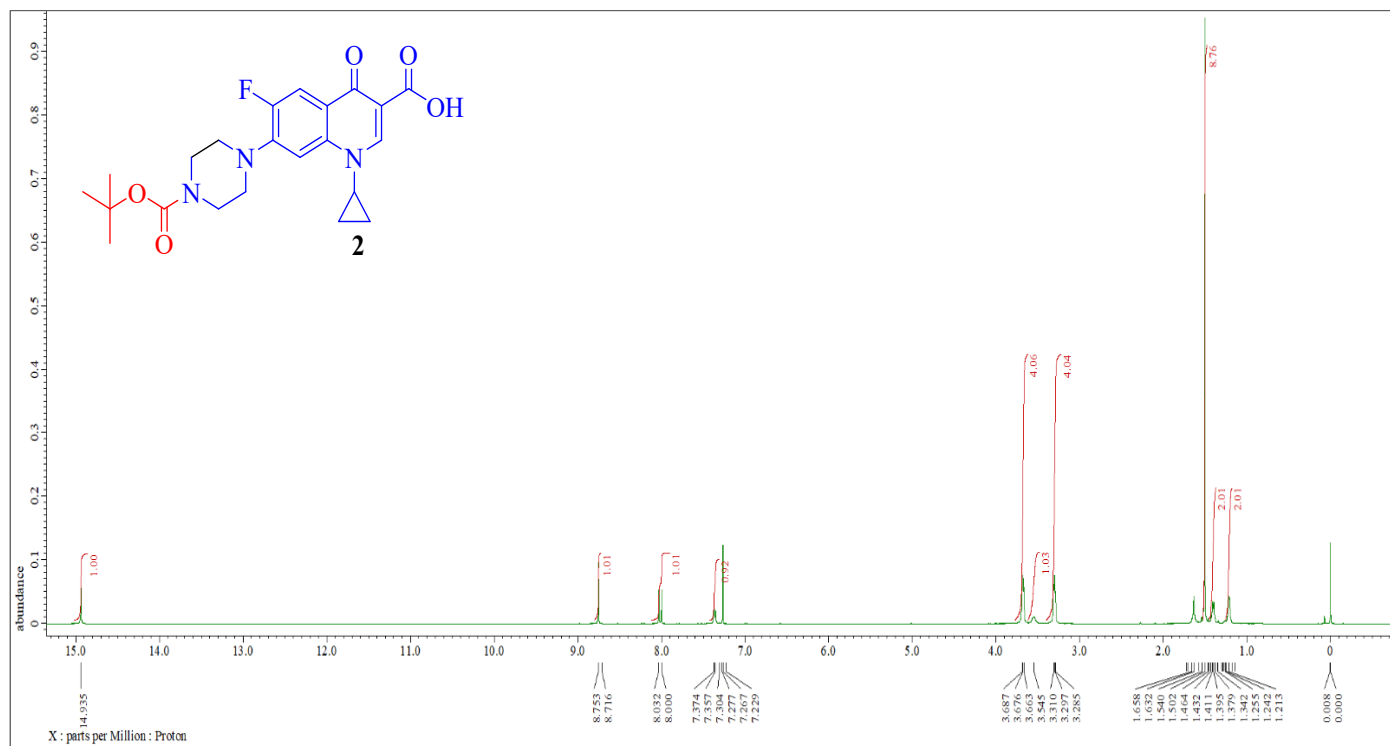

# <sup>13</sup>C-NMR spectrum of compound 2

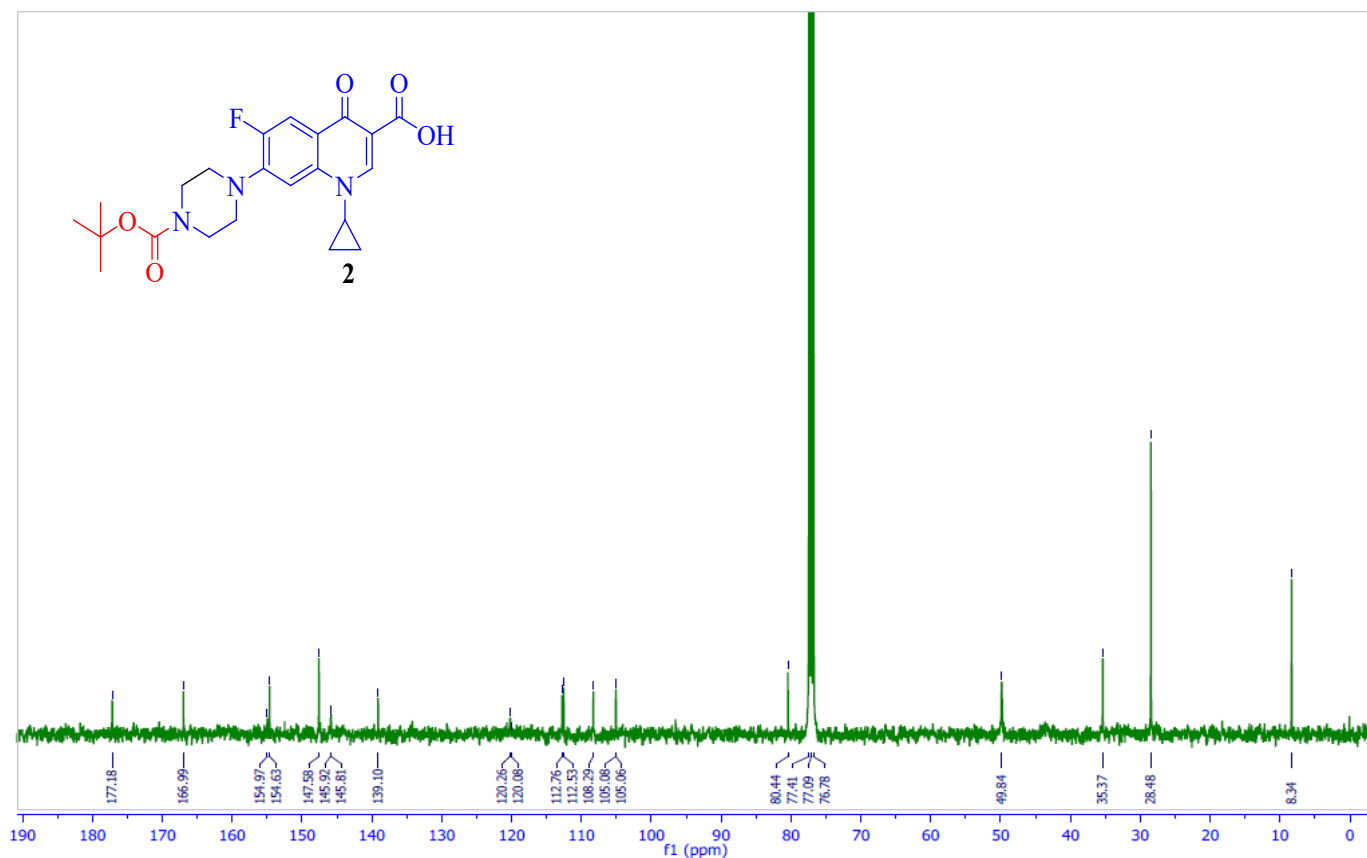

### $^1\text{H-NMR}$ spectrum of compound 3

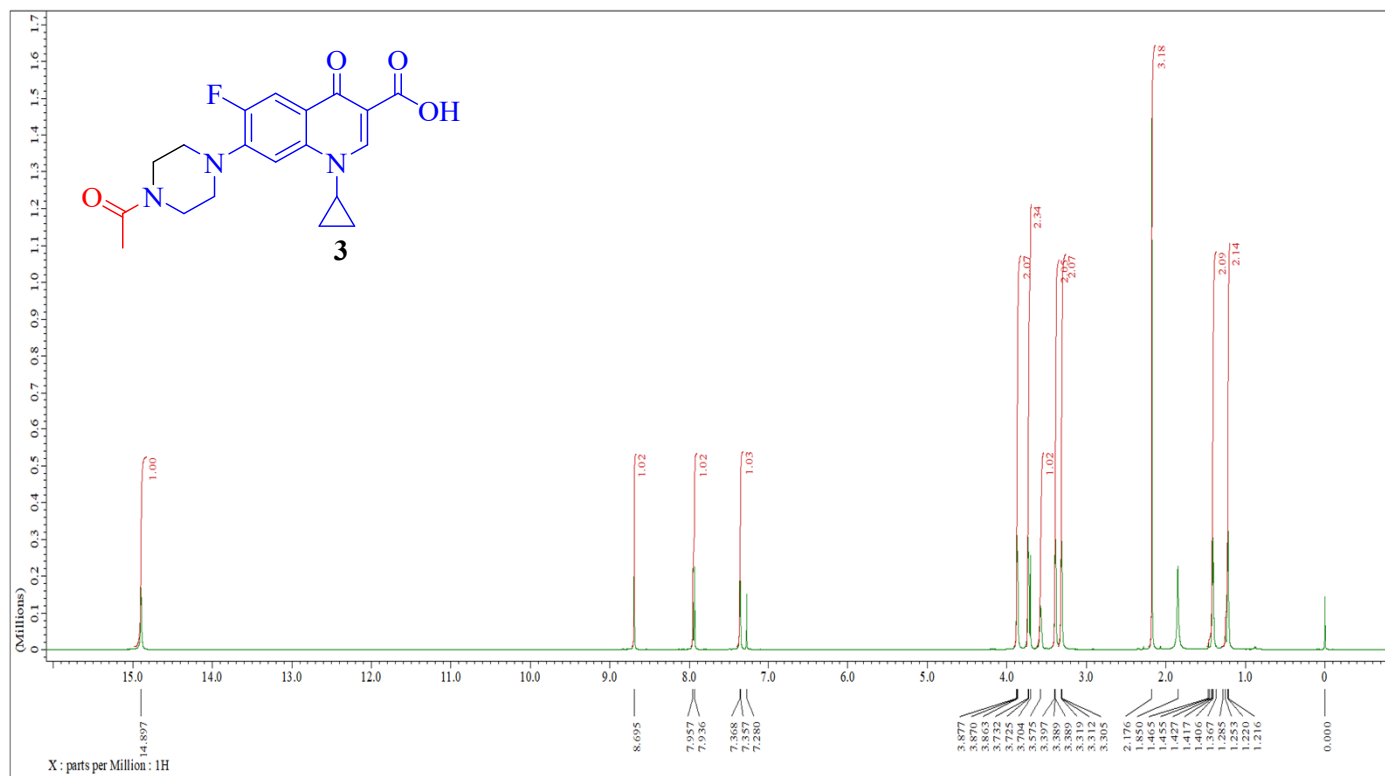

Figure S4.  $^{13}\text{C-NMR}$  spectrum of compound 3

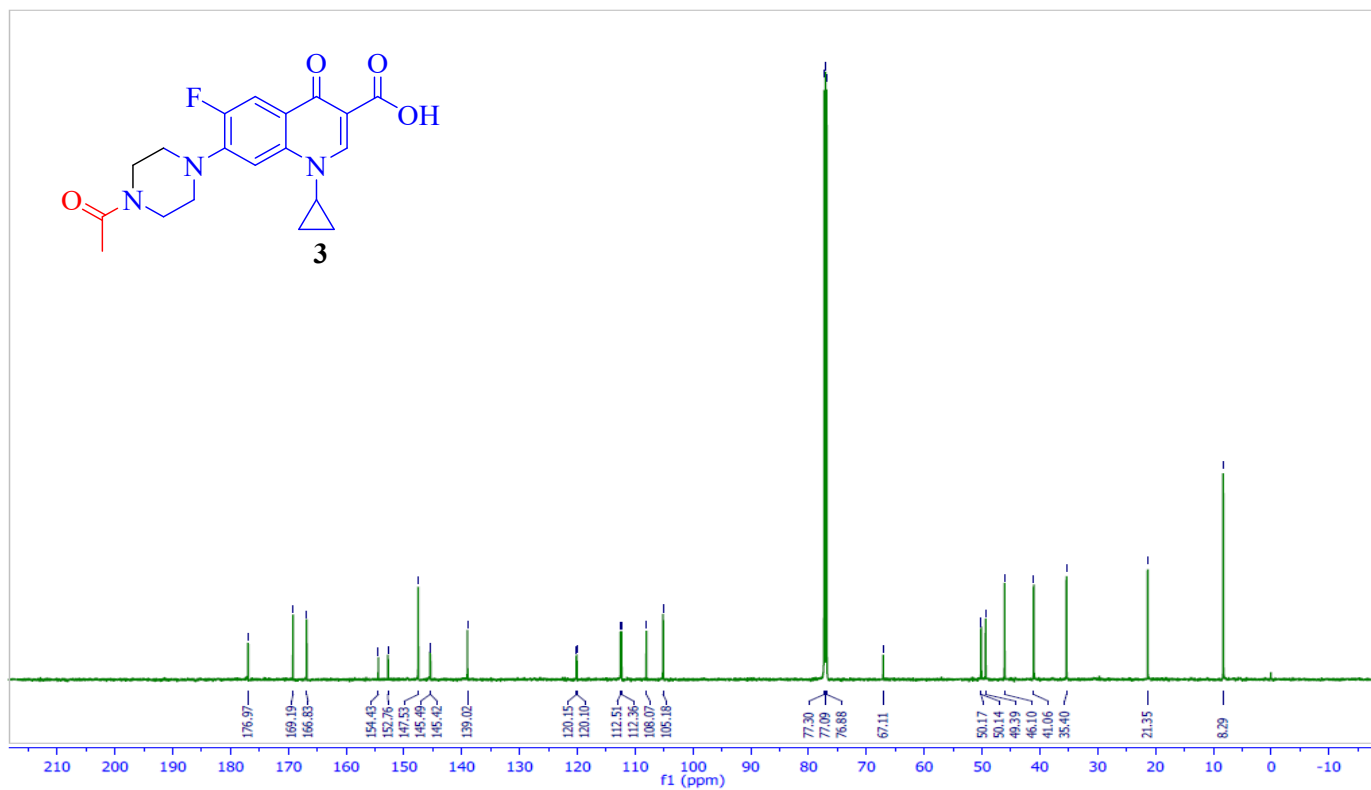

# <sup>1</sup>H-NMR spectrum of compound 4

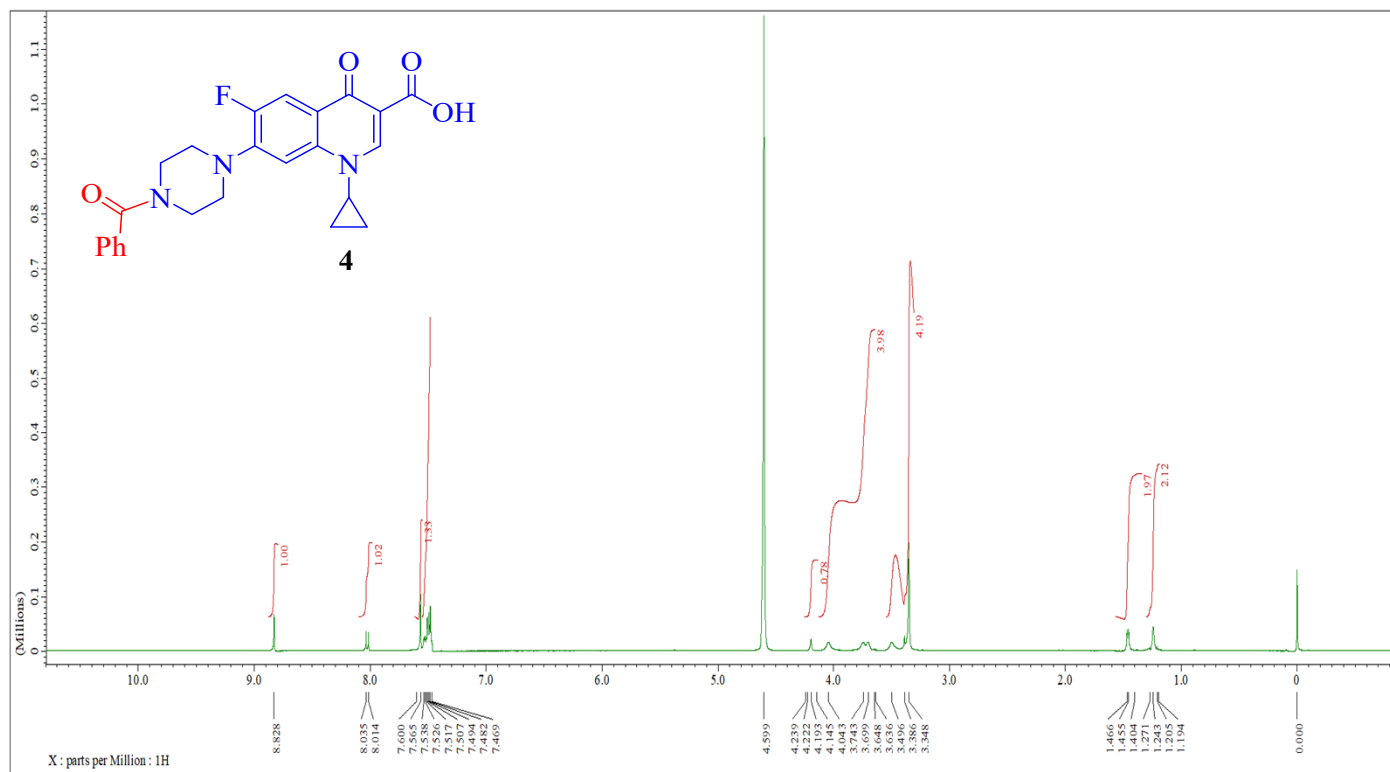

# <sup>13</sup>C-NMR spectrum of compound 4

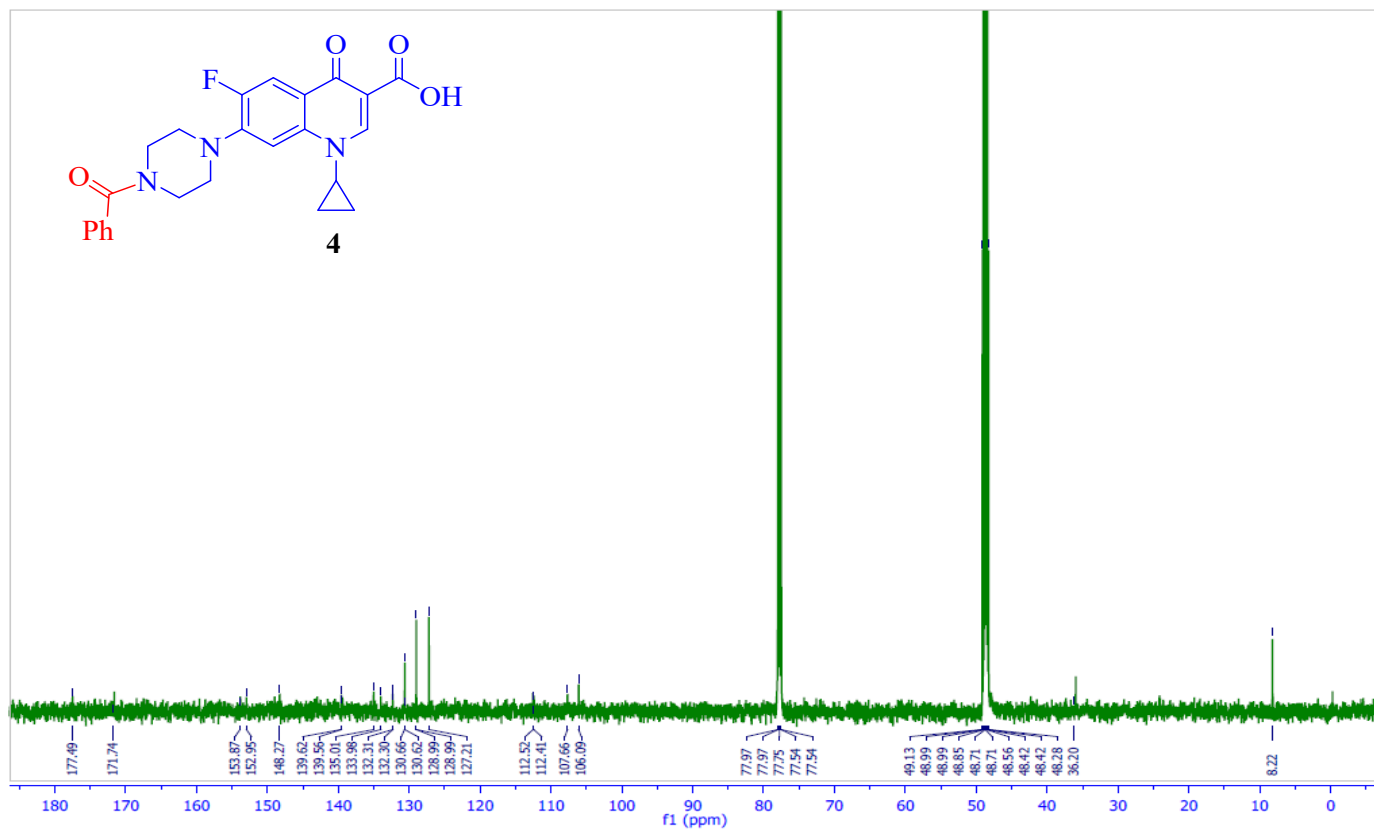

# <sup>1</sup>H-NMR spectrum of compound 5

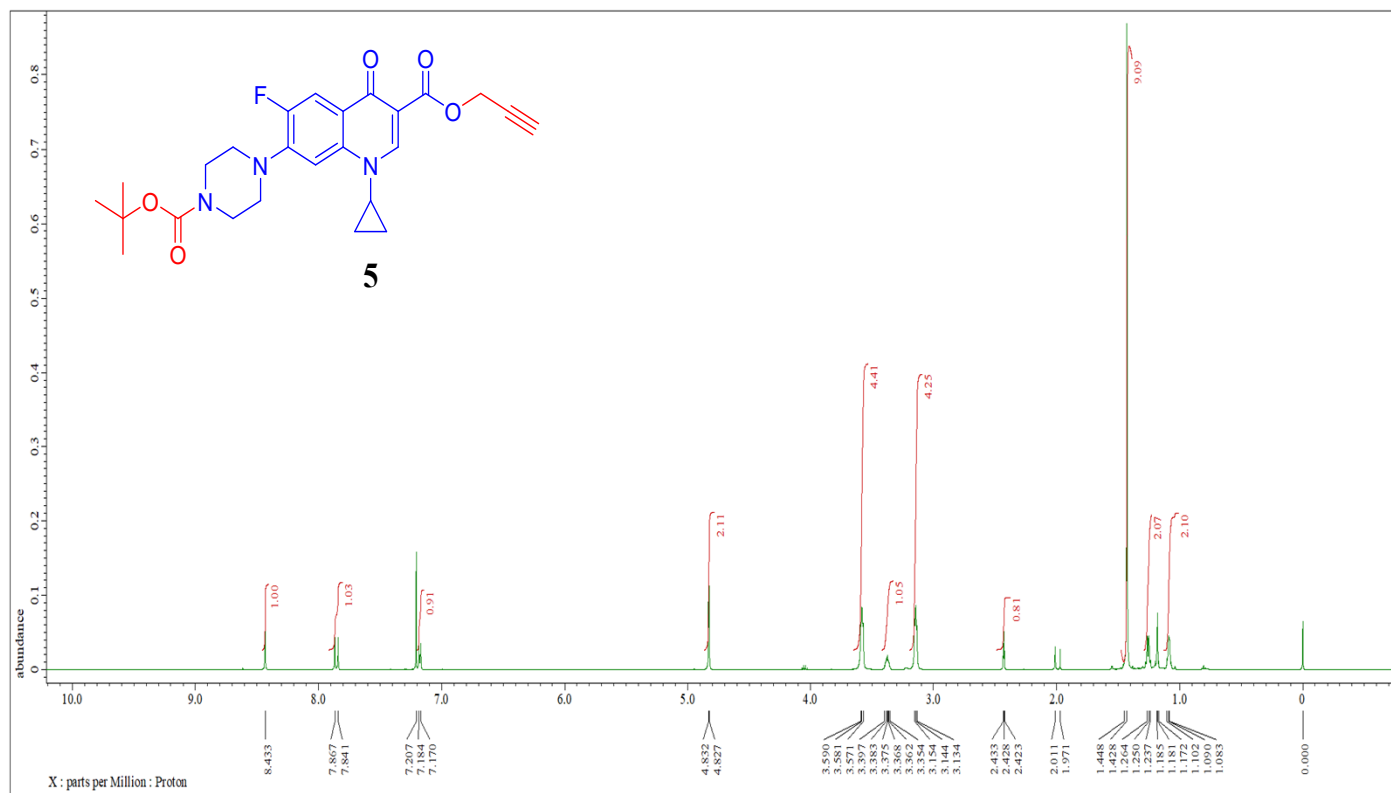

# <sup>13</sup>C-NMR spectrum of compound 5

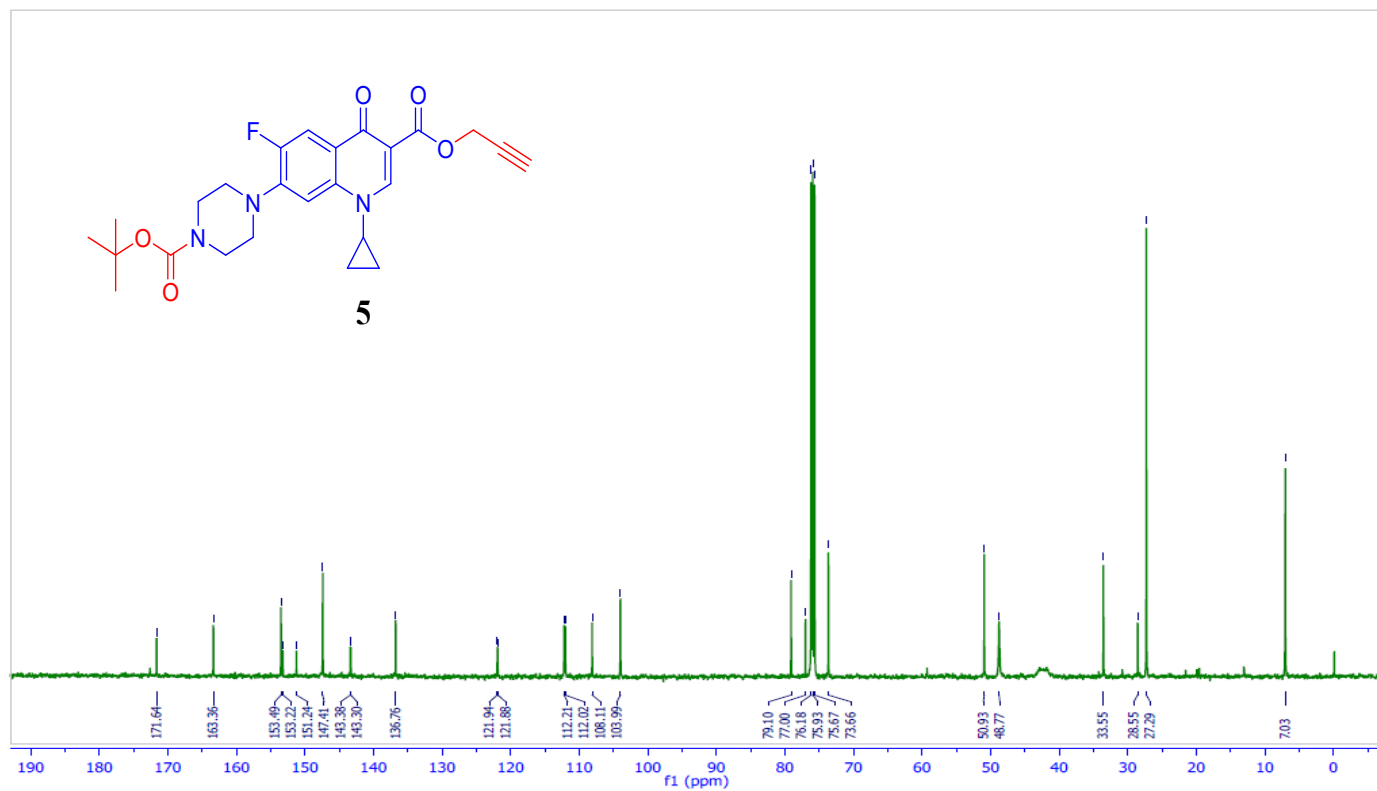

## HRMS of compound 5

|                               |              |                      |                        |
|-------------------------------|--------------|----------------------|------------------------|
| <b>Data File</b>              | CPR-03.d     | <b>Sample Name</b>   | CPR-03                 |
| <b>Sample Type</b>            | Sample       | <b>Position</b>      | P1-D4                  |
| <b>Instrument Name</b>        | Instrument 1 | <b>User Name</b>     |                        |
| <b>Acq Method</b>             | MS Scan.m    | <b>Acquired Time</b> | 14-12-2022<br>15:01:09 |
| <b>IRM Calibration Status</b> | Success      | <b>DA Method</b>     | Default.m              |
| <b>Comment</b>                |              |                      |                        |

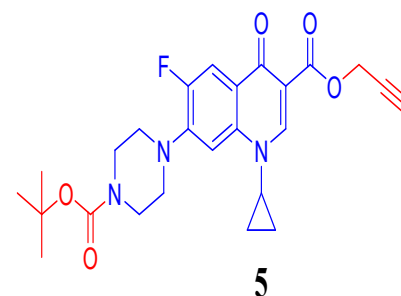

|                               |                                                         |              |   |
|-------------------------------|---------------------------------------------------------|--------------|---|
| <b>Sample Group</b>           |                                                         | <b>Info.</b> | 3 |
| <b>Acquisition SW Version</b> | 6200 series TOF/6500<br>series Q-TOF B.05.01<br>(B5125) |              |   |

### Compound Table

| Compound Label         | RT    | Mass     | Abund | Formula         | Tgt Mass | Diff (ppm) | MFG Formula     | DB Formula      |
|------------------------|-------|----------|-------|-----------------|----------|------------|-----------------|-----------------|
| Cpd 1: C25 H28 F N3 O5 | 1.849 | 469.2003 | 18016 | C25 H28 F N3 O5 | 469.2013 | -2.07      | C25 H28 F N3 O5 | C25 H28 F N3 O5 |

| Compound Label         | m/z      | RT    | Algorithm       | Mass     |
|------------------------|----------|-------|-----------------|----------|
| Cpd 1: C25 H28 F N3 O5 | 470.2075 | 1.849 | Find By Formula | 469.2003 |

### MS Zoomed Spectrum

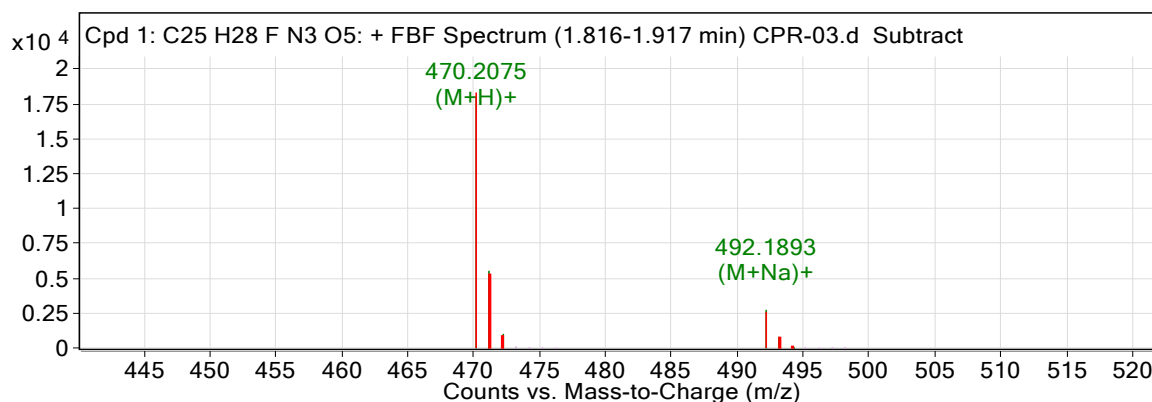

### MS Spectrum Peak List

| m/z      | z | Abund    | Formula       | Ion     |
|----------|---|----------|---------------|---------|
| 470.2075 | 1 | 18015.81 | C25H29FN3O5   | (M+H)+  |
| 471.2111 | 1 | 5512.48  | C25H29FN3O5   | (M+H)+  |
| 472.2142 | 1 | 975.06   | C25H29FN3O5   | (M+H)+  |
| 492.1893 | 1 | 2698.42  | C25H28FN3NaO5 | (M+Na)+ |
| 493.193  | 1 | 749.99   | C25H28FN3NaO5 | (M+Na)+ |
| 494.1997 | 1 | 51.79    | C25H28FN3NaO5 | (M+Na)+ |

--- End Of Report ---

<sup>1</sup>H-NMR spectrum of compound 6

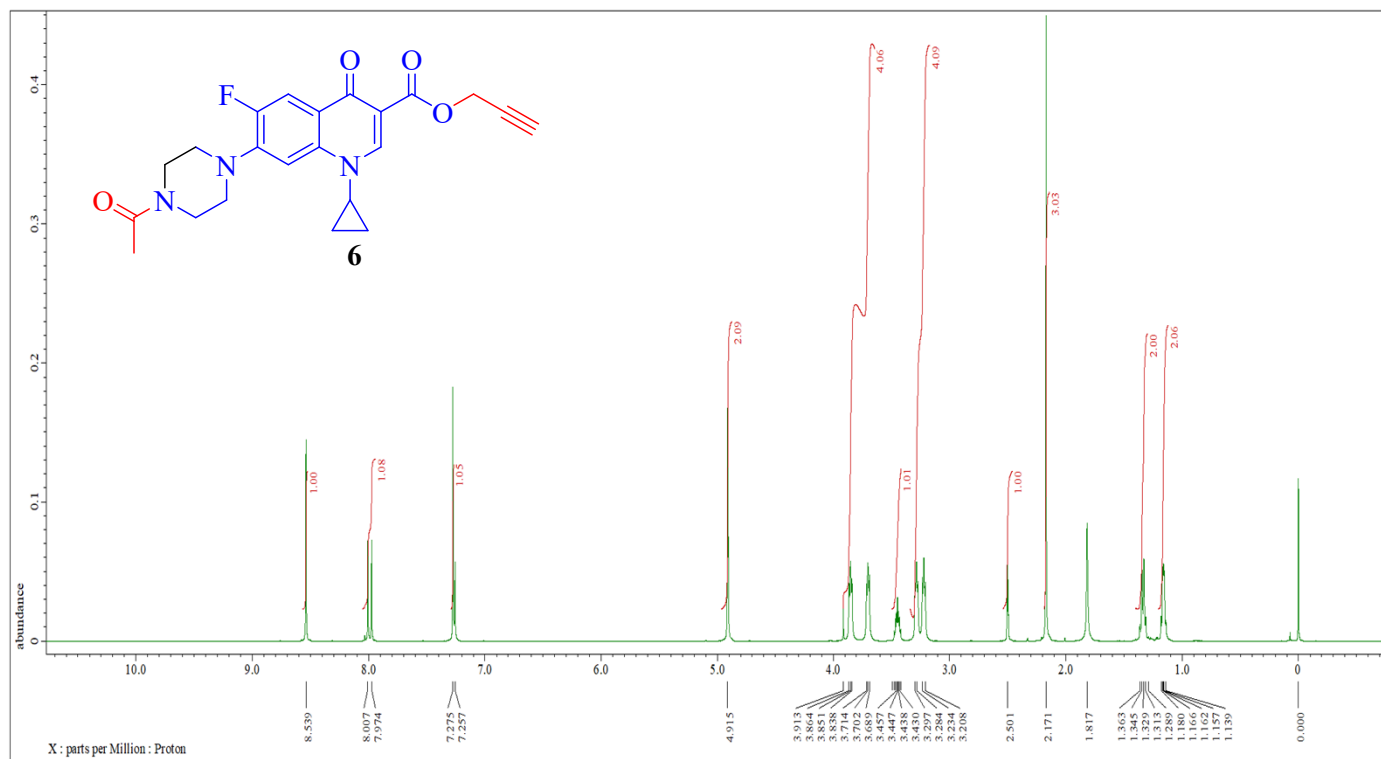

<sup>13</sup>C-NMR spectrum of compound 6

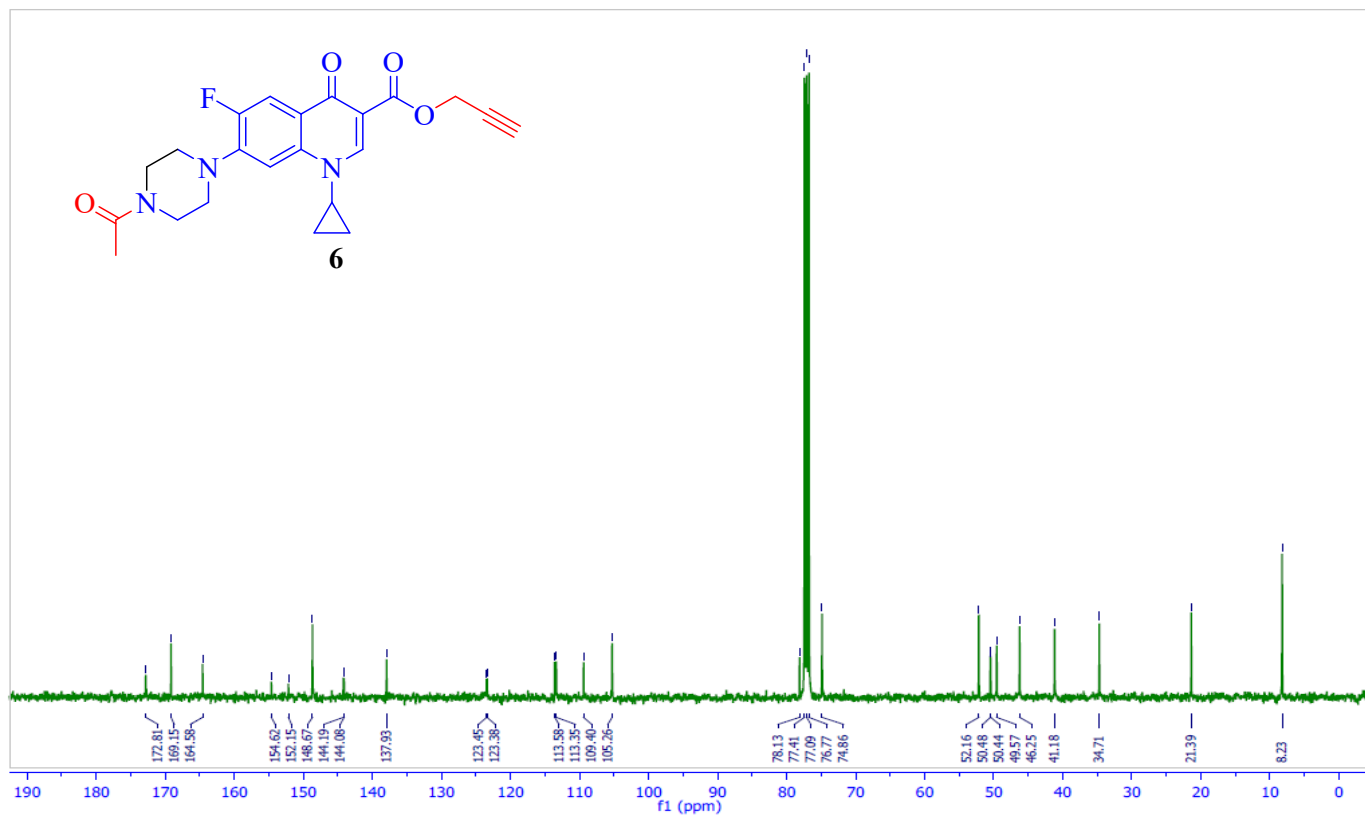



$^{19}\text{F}$ -NMR spectrum of compound **6**

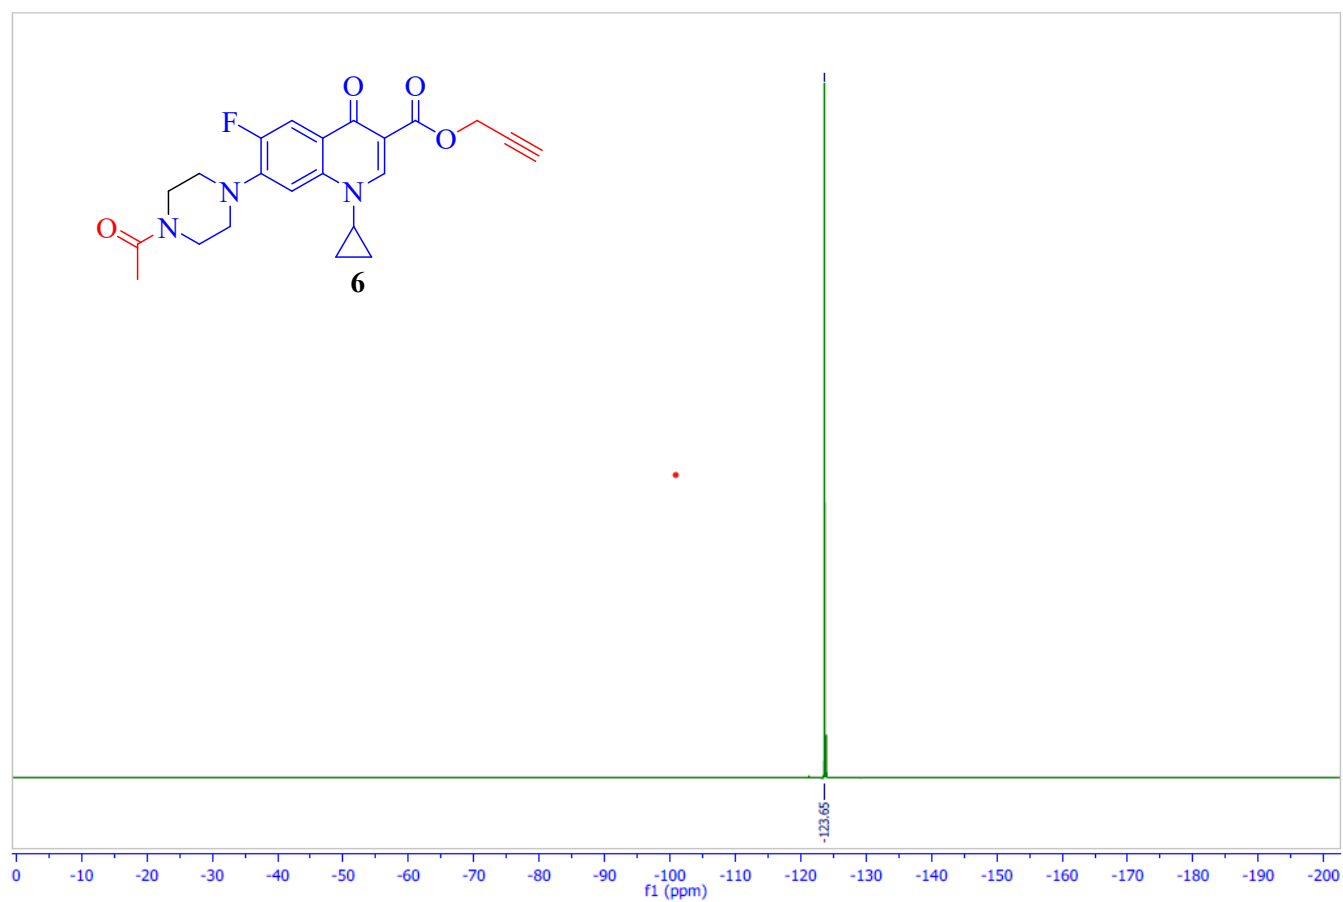

## HRMS of compound 6

|                               |              |                      |                        |
|-------------------------------|--------------|----------------------|------------------------|
| <b>Data File</b>              | CPR-18.d     | <b>Sample Name</b>   | CPR-18                 |
| <b>Sample Type</b>            | Sample       | <b>Position</b>      | P1-C3                  |
| <b>Instrument Name</b>        | Instrument 1 | <b>User Name</b>     |                        |
| <b>Acq Method</b>             | MS Scan.m    | <b>Acquired Time</b> | 24-05-2023<br>13:50:37 |
| <b>IRM Calibration Status</b> | Success      | <b>DA Method</b>     | Default.m              |
| <b>Comment</b>                |              |                      |                        |

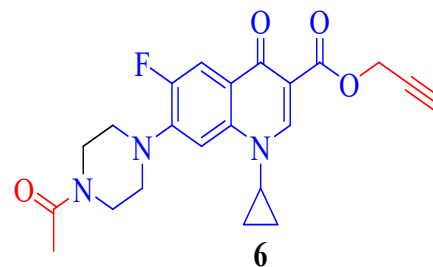

|                               |                                                             |              |   |
|-------------------------------|-------------------------------------------------------------|--------------|---|
| <b>Sample Group</b>           |                                                             | <b>Info.</b> | 3 |
| <b>Acquisition SW Version</b> | 6200 series<br>TOF/6500 series Q-<br>TOF B.05.01<br>(B5125) |              |   |

### Compound Table

| Compound Label         | RT    | Mass     | Abund | Formula         | Tgt Mass | Diff (ppm) | MFG Formula     | DB Formula      |
|------------------------|-------|----------|-------|-----------------|----------|------------|-----------------|-----------------|
| Cpd 1: C22 H22 F N3 O4 | 0.137 | 411.1578 | 41486 | C22 H22 F N3 O4 | 411.1594 | -3.95      | C22 H22 F N3 O4 | C22 H22 F N3 O4 |

| Compound Label         | m/z      | RT    | Algorithm       | Mass     |
|------------------------|----------|-------|-----------------|----------|
| Cpd 1: C22 H22 F N3 O4 | 434.1471 | 0.137 | Find By Formula | 411.1578 |

### MS Zoomed Spectrum

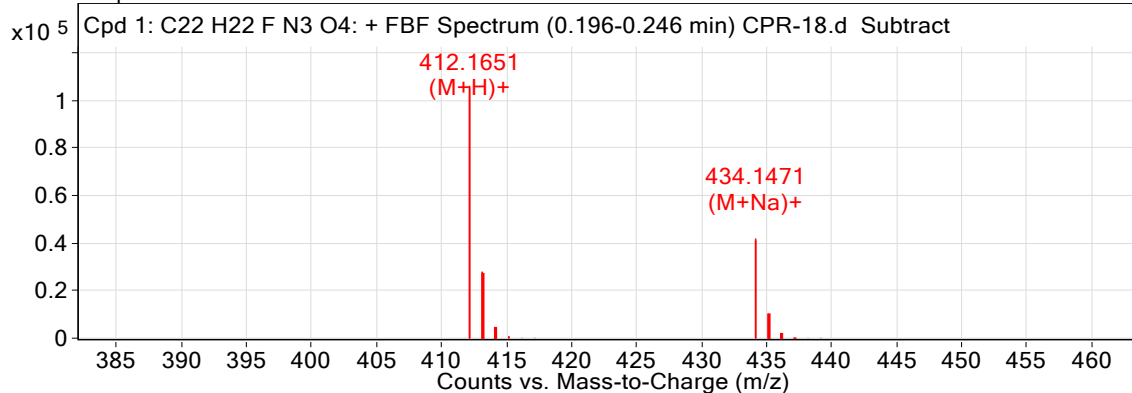

### MS Spectrum Peak List

| m/z      | z | Abund     | Formula       | Ion     |
|----------|---|-----------|---------------|---------|
| 412.1651 | 1 | 105651.67 | C22H23FN3O4   | (M+H)+  |
| 413.1683 | 1 | 27719.85  | C22H23FN3O4   | (M+H)+  |
| 414.1706 | 1 | 3926.74   | C22H23FN3O4   | (M+H)+  |
| 415.1746 | 1 | 436.17    | C22H23FN3O4   | (M+H)+  |
| 434.1471 | 1 | 41485.79  | C22H22FN3NaO4 | (M+Na)+ |
| 435.1499 | 1 | 10222.06  | C22H22FN3NaO4 | (M+Na)+ |
| 436.1522 | 1 | 1431.65   | C22H22FN3NaO4 | (M+Na)+ |
| 437.1556 | 1 | 87.13     | C22H22FN3NaO4 | (M+Na)+ |

--- End Of Report ---

<sup>1</sup>H-NMR spectrum of compound 7

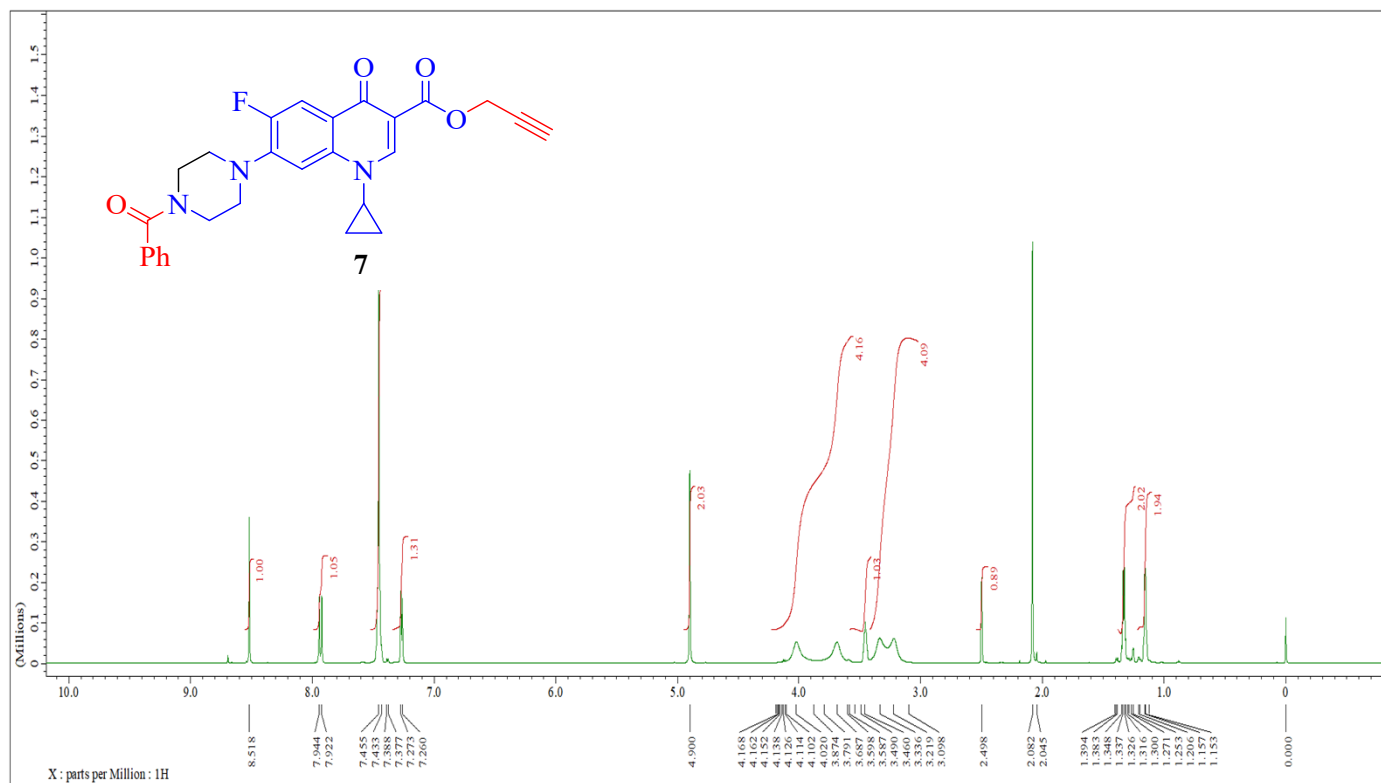

<sup>13</sup>C-NMR spectrum of compound 7

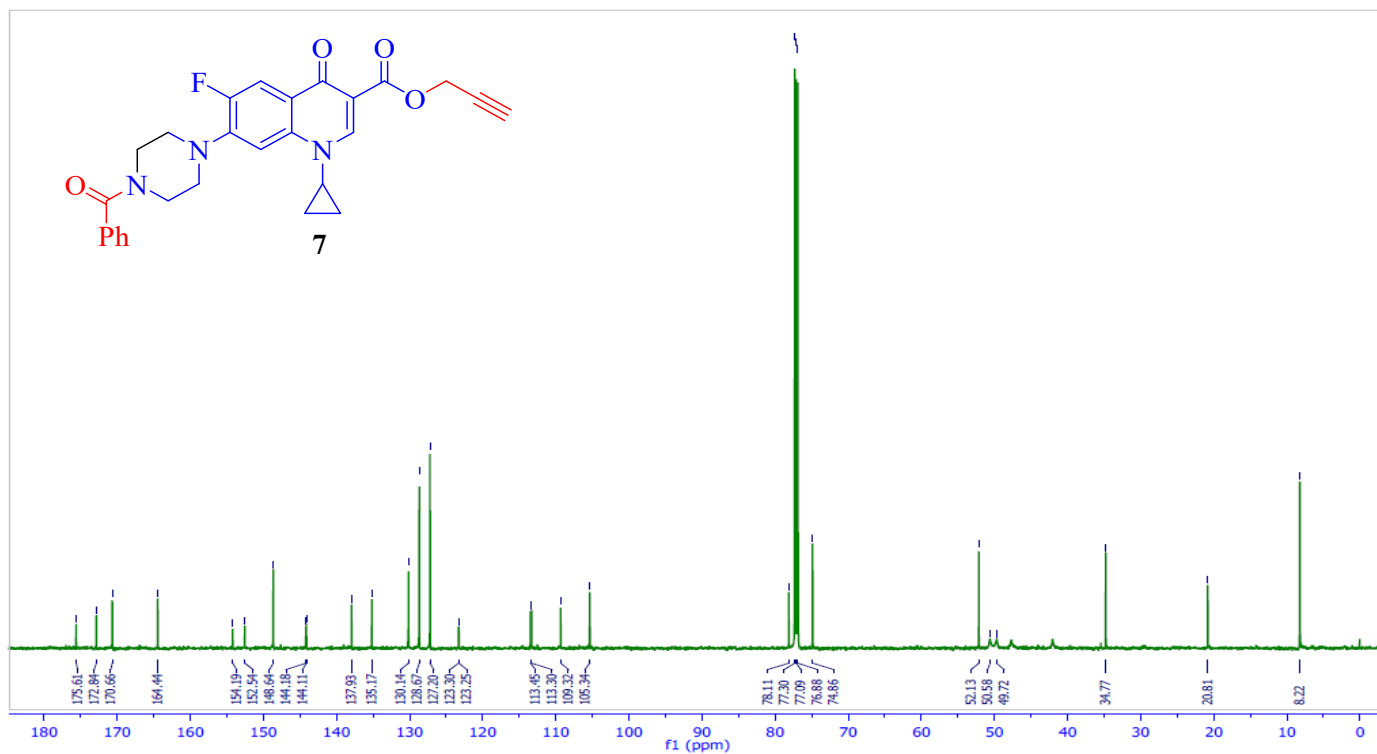

$^{19}\text{F}$ -NMR spectrum of compound 7

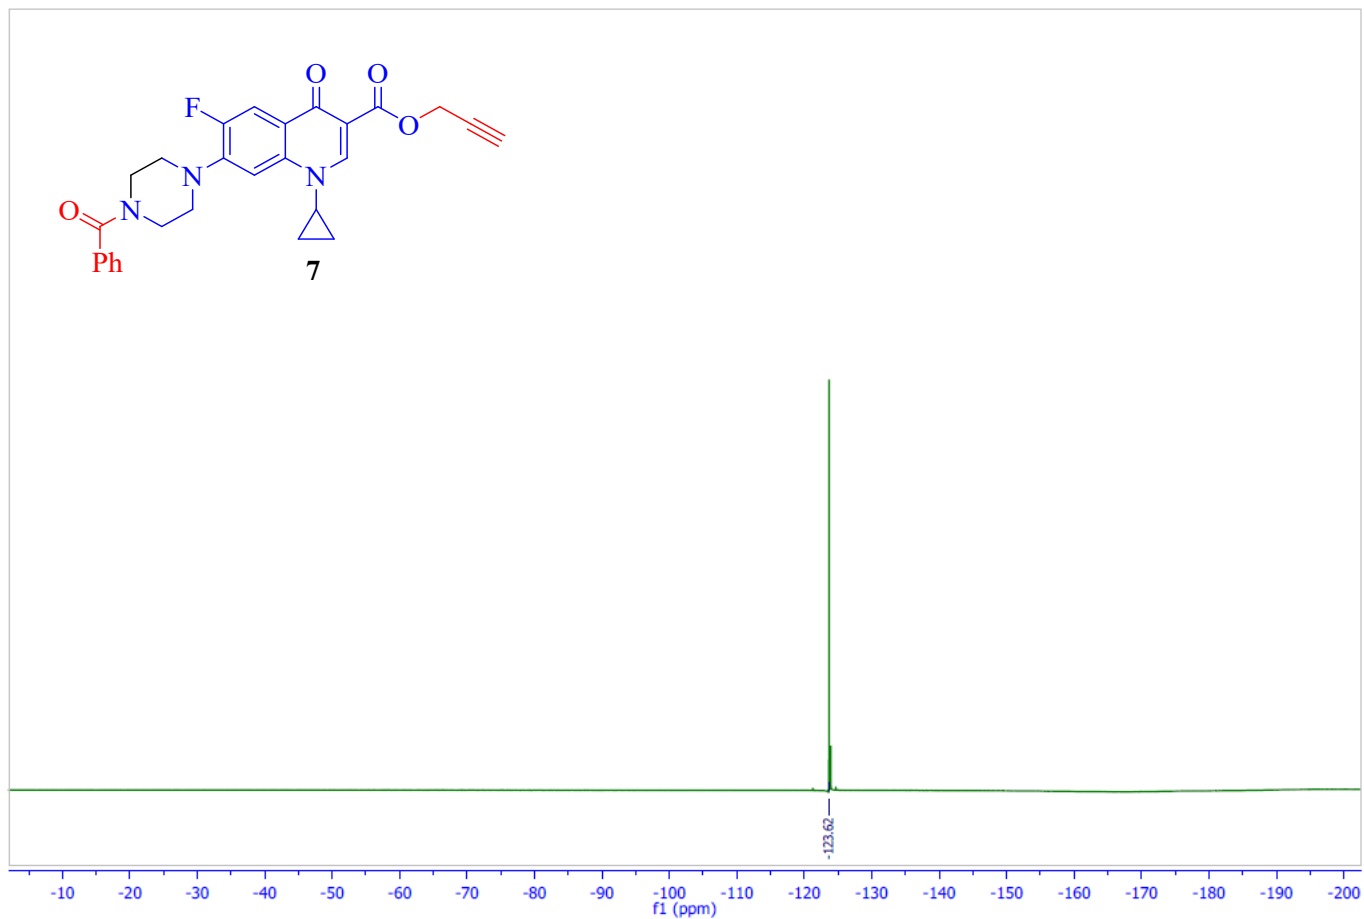

## HRMS of compound 7

|                               |              |                      |                        |
|-------------------------------|--------------|----------------------|------------------------|
| <b>Data File</b>              | CPR-26.d     | <b>Sample Name</b>   | CPR-26                 |
| <b>Sample Type</b>            | Sample       | <b>Position</b>      | P1-E7                  |
| <b>Instrument Name</b>        | Instrument 1 | <b>User Name</b>     |                        |
| <b>Acq Method</b>             | MS Scan.m    | <b>Acquired Time</b> | 01-06-2023<br>16:39:20 |
| <b>IRM Calibration Status</b> | Success      | <b>DA Method</b>     | Default.m              |
| <b>Comment</b>                |              |                      |                        |

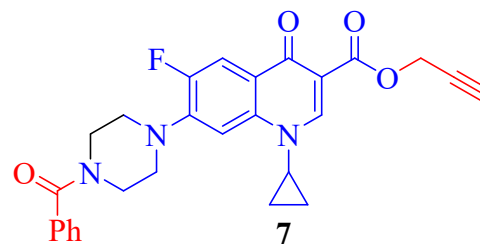

|                               |                                                             |              |   |
|-------------------------------|-------------------------------------------------------------|--------------|---|
| <b>Sample Group</b>           |                                                             | <b>Info.</b> | 3 |
| <b>Acquisition SW Version</b> | 6200 series<br>TOF/6500 series Q-<br>TOF B.05.01<br>(B5125) |              |   |

### Compound Table

| Compound Label         | RT    | Mass     | Abund | Formula         | Tgt Mass | Diff (ppm) | MFG Formula     | DB Formula      |
|------------------------|-------|----------|-------|-----------------|----------|------------|-----------------|-----------------|
| Cpd 1: C27 H24 F N3 O4 | 0.106 | 473.1766 | 91189 | C27 H24 F N3 O4 | 473.1751 | 3.26       | C27 H24 F N3 O4 | C27 H24 F N3 O4 |

| Compound Label         | m/z     | RT    | Algorithm       | Mass     |
|------------------------|---------|-------|-----------------|----------|
| Cpd 1: C27 H24 F N3 O4 | 474.184 | 0.106 | Find By Formula | 473.1766 |

### MS Zoomed Spectrum

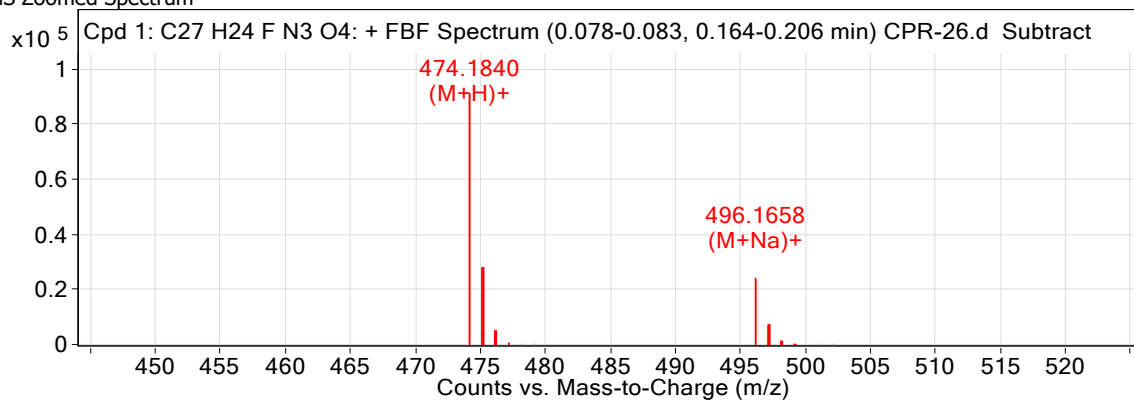

### MS Spectrum Peak List

| m/z      | z | Abund    | Formula       | Ion     |
|----------|---|----------|---------------|---------|
| 474.184  | 1 | 91188.99 | C27H25FN3O4   | (M+H)+  |
| 475.1871 | 1 | 28074.91 | C27H25FN3O4   | (M+H)+  |
| 476.1896 | 1 | 4533.76  | C27H25FN3O4   | (M+H)+  |
| 477.192  | 1 | 569.29   | C27H25FN3O4   | (M+H)+  |
| 496.1658 | 1 | 24142.34 | C27H24FN3NaO4 | (M+Na)+ |
| 497.1687 | 1 | 6712     | C27H24FN3NaO4 | (M+Na)+ |
| 498.1718 | 1 | 1075.6   | C27H24FN3NaO4 | (M+Na)+ |
| 499.1744 | 1 | 82.46    | C27H24FN3NaO4 | (M+Na)+ |

--- End Of Report ---

# <sup>1</sup>H-NMR spectrum of compound 9a

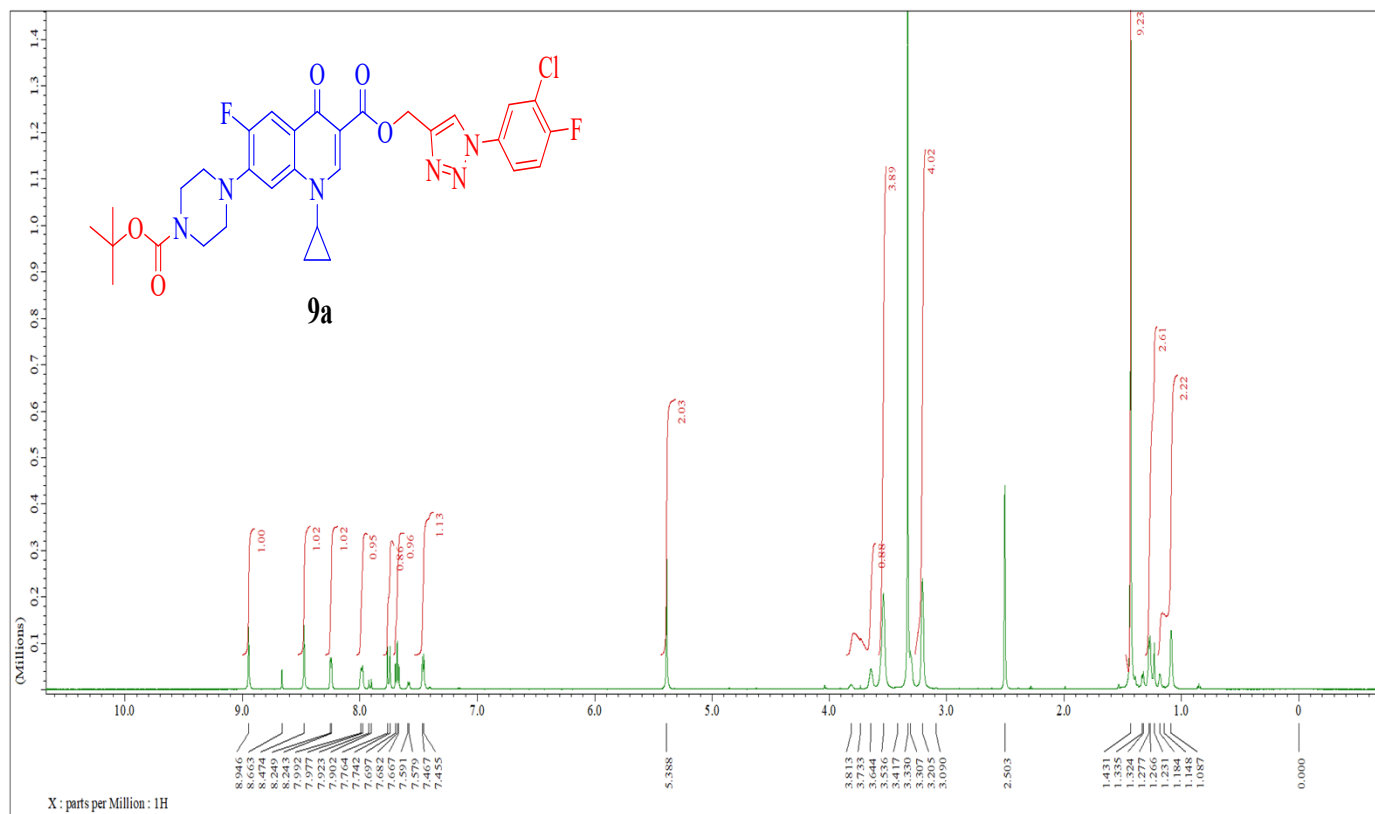

# <sup>13</sup>C-NMR spectrum of compound 9a

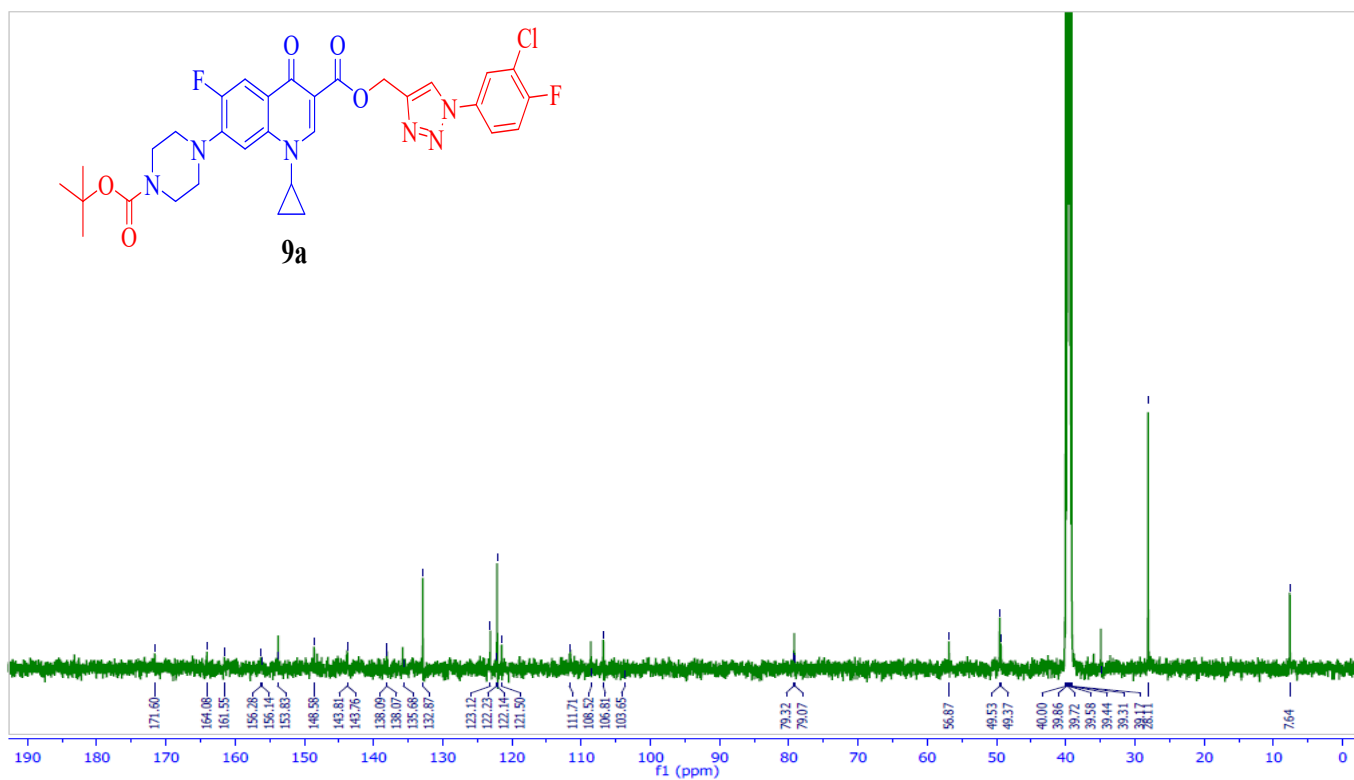

## HRMS of compound 9a

|                               |              |                      |                        |
|-------------------------------|--------------|----------------------|------------------------|
| <b>Data File</b>              | CPR-04.d     | <b>Sample Name</b>   | CPR-04                 |
| <b>Sample Type</b>            | Sample       | <b>Position</b>      | P1-B8                  |
| <b>Instrument Name</b>        | Instrument 1 | <b>User Name</b>     |                        |
| <b>Acq Method</b>             | MS Scan.m    | <b>Acquired Time</b> | 24-05-2023<br>13:43:17 |
| <b>IRM Calibration Status</b> | Success      | <b>DA Method</b>     | Default.m              |
| <b>Comment</b>                |              |                      |                        |

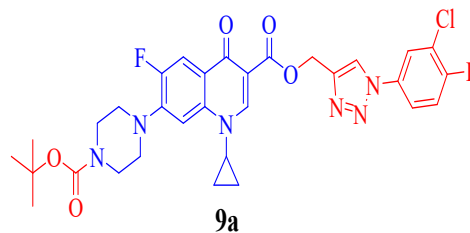

|                               |                                                      |              |   |
|-------------------------------|------------------------------------------------------|--------------|---|
| <b>Sample Group</b>           |                                                      | <b>Info.</b> | 3 |
| <b>Acquisition SW Version</b> | 6200 series TOF/6500 series<br>Q-TOF B.05.01 (B5125) |              |   |

### Compound Table

| Compound Label             | RT  | Mass    | Abund | Formula             | Tgt Mass | Diff (ppm) | MFG Formula         | DB Formula          |
|----------------------------|-----|---------|-------|---------------------|----------|------------|---------------------|---------------------|
| Cpd 1: C31 H31 Cl F2 N6 O5 | 0.1 | 640.199 | 89395 | C31 H31 Cl F2 N6 O5 | 640.2013 | -3.55      | C31 H31 Cl F2 N6 O5 | C31 H31 Cl F2 N6 O5 |

| Compound Label             | m/z      | RT  | Algorithm       | Mass    |
|----------------------------|----------|-----|-----------------|---------|
| Cpd 1: C31 H31 Cl F2 N6 O5 | 641.2063 | 0.1 | Find By Formula | 640.199 |

### MS Zoomed Spectrum

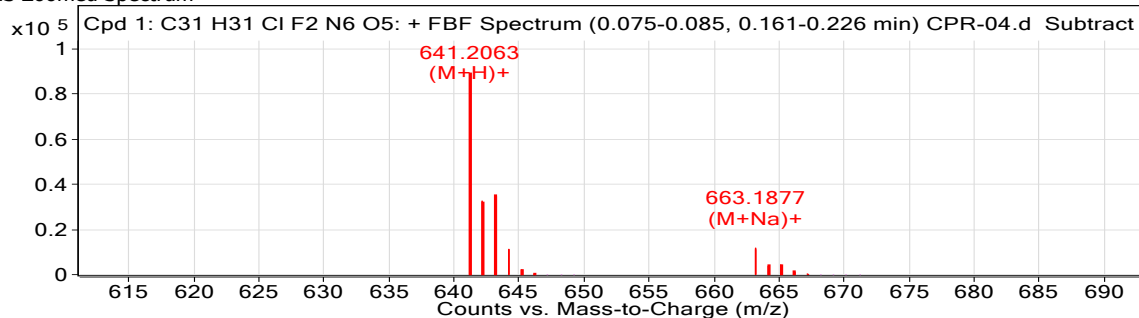

### MS Spectrum Peak List

| m/z      | z | Abund    | Formula          | Ion     |
|----------|---|----------|------------------|---------|
| 641.2063 | 1 | 89395.34 | C31H32ClF2N6O5   | (M+H)+  |
| 642.2095 | 1 | 32762.94 | C31H32ClF2N6O5   | (M+H)+  |
| 643.2052 | 1 | 34802.82 | C31H32ClF2N6O5   | (M+H)+  |
| 644.2067 | 1 | 11105.19 | C31H32ClF2N6O5   | (M+H)+  |
| 645.2089 | 1 | 2049.92  | C31H32ClF2N6O5   | (M+H)+  |
| 646.2106 | 1 | 242.11   | C31H32ClF2N6O5   | (M+H)+  |
| 663.1877 | 1 | 11554.72 | C31H31ClF2N6NaO5 | (M+Na)+ |
| 664.1904 | 1 | 3927.82  | C31H31ClF2N6NaO5 | (M+Na)+ |
| 665.1861 | 1 | 4251.23  | C31H31ClF2N6NaO5 | (M+Na)+ |
| 666.1878 | 1 | 1250.41  | C31H31ClF2N6NaO5 | (M+Na)+ |
| 667.1898 | 1 | 235.08   | C31H31ClF2N6NaO5 | (M+Na)+ |

--- End Of Report ---

$^1\text{H-NMR}$  spectrum of compound **9b**

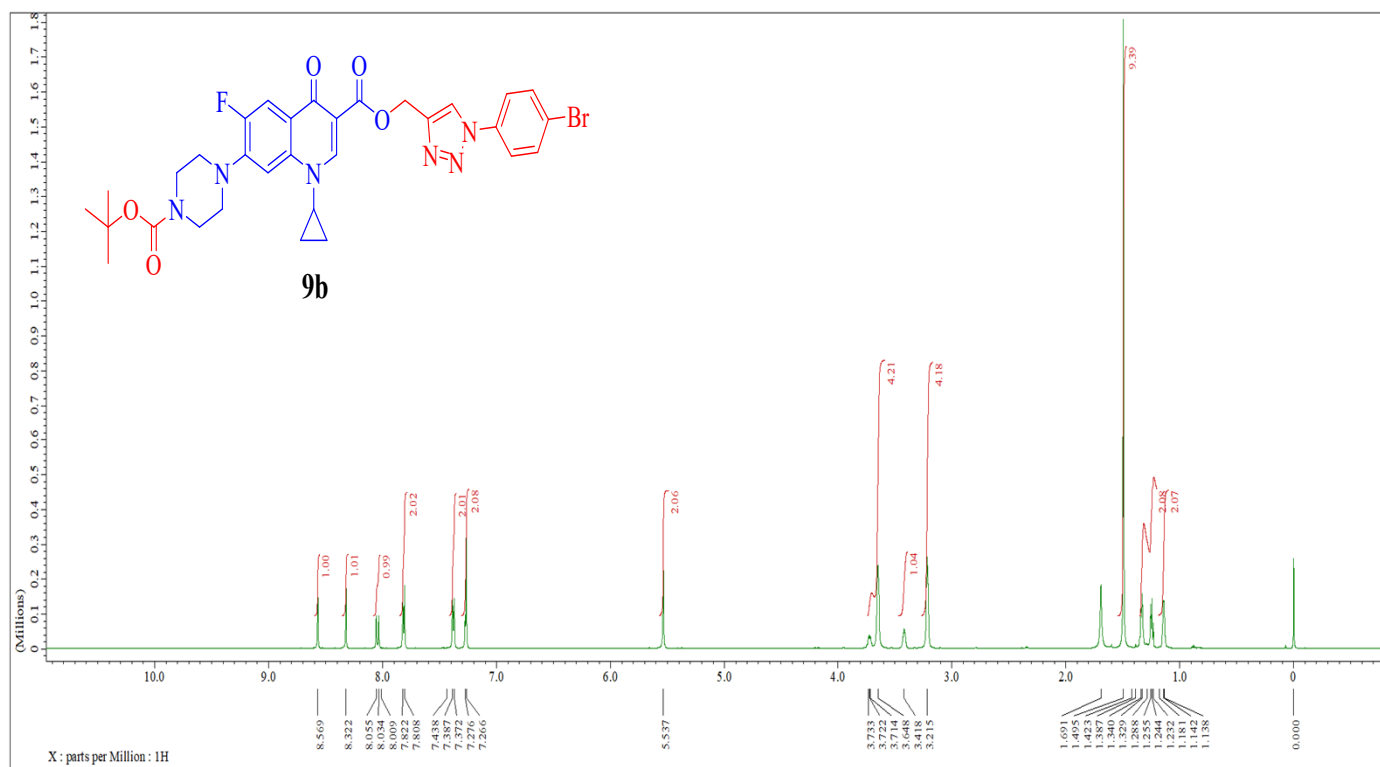

$^{13}\text{C-NMR}$  spectrum of compound **9b**

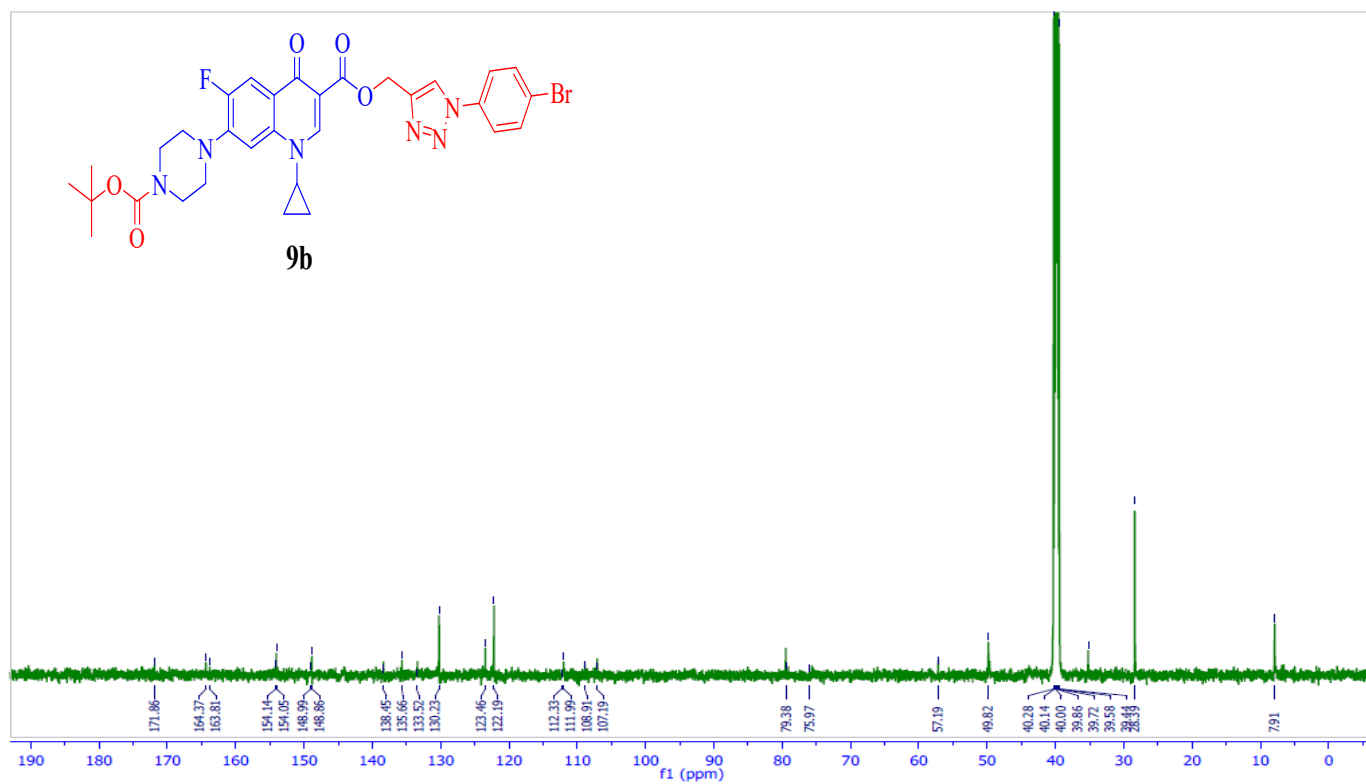



## HRMS of compound 9b

|                               |              |                      |                                     |
|-------------------------------|--------------|----------------------|-------------------------------------|
| <b>Data File</b>              | CPR-05.d     | <b>Sample Name</b>   | CPR-05                              |
| <b>Sample Type</b>            | Sample       | <b>Position</b>      | P1-D6                               |
| <b>Instrument Name</b>        | Instrument 1 | <b>User Name</b>     |                                     |
| <b>Acq Method</b>             | MS Scan.m    | <b>Acquired Time</b> | 14-12-2022<br>15:08:40<br>Default.m |
| <b>IRM Calibration Status</b> | Success      | <b>DA Method</b>     |                                     |
| <b>Comment</b>                |              |                      |                                     |

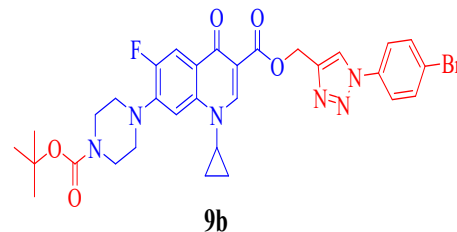

|                     |                              |              |   |
|---------------------|------------------------------|--------------|---|
| <b>Sample Group</b> |                              | <b>Info.</b> | 3 |
| <b>Acquisition</b>  | 6200 series TOF/6500         |              |   |
| <b>SW Version</b>   | series Q-TOF B.05.01 (B5125) |              |   |

### Compound Table

| Compound Label            | RT    | Mass     | Abund | Formula            | Tgt Mass | Diff (ppm) | MFG Formula        | DB Formula         |
|---------------------------|-------|----------|-------|--------------------|----------|------------|--------------------|--------------------|
| Cpd 1: C31 H32 Br F N6 O5 | 0.525 | 666.1591 | 7827  | C31 H32 Br F N6 O5 | 666.1602 | -1.64      | C31 H32 Br F N6 O5 | C31 H32 Br F N6 O5 |

| Compound Label            | m/z      | RT    | Algorithm       | Mass     |
|---------------------------|----------|-------|-----------------|----------|
| Cpd 1: C31 H32 Br F N6 O5 | 669.1645 | 0.525 | Find By Formula | 666.1591 |

### MS Zoomed Spectrum

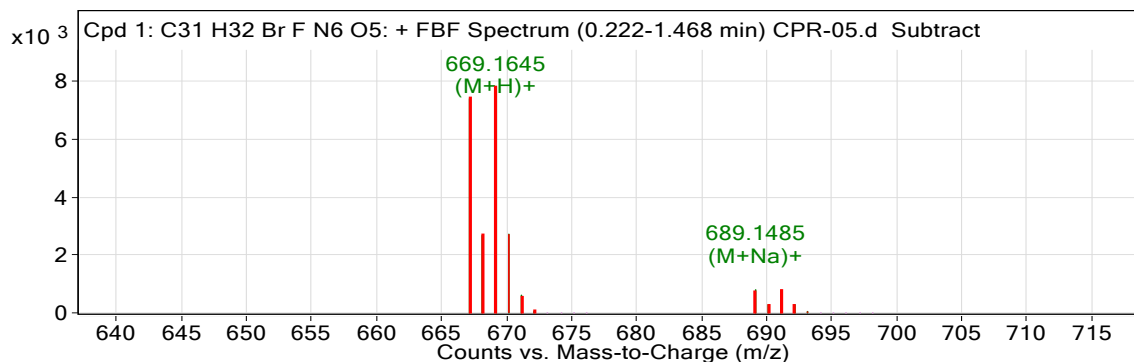

### MS Spectrum Peak List

| m/z      | z | Abund   | Formula         | Ion     |
|----------|---|---------|-----------------|---------|
| 667.166  | 1 | 7412.58 | C31H33BrFN6O5   | (M+H)+  |
| 668.1694 | 1 | 2682.78 | C31H33BrFN6O5   | (M+H)+  |
| 669.1645 | 1 | 7827.28 | C31H33BrFN6O5   | (M+H)+  |
| 670.1675 | 1 | 2733.04 | C31H33BrFN6O5   | (M+H)+  |
| 671.1732 | 1 | 624.4   | C31H33BrFN6O5   | (M+H)+  |
| 672.1624 | 1 | 31.42   | C31H33BrFN6O5   | (M+H)+  |
| 689.1485 | 1 | 788.61  | C31H32BrFN6NaO5 | (M+Na)+ |
| 690.1544 | 1 | 270.97  | C31H32BrFN6NaO5 | (M+Na)+ |
| 691.1485 | 1 | 752.61  | C31H32BrFN6NaO5 | (M+Na)+ |
| 692.1497 | 1 | 285.21  | C31H32BrFN6NaO5 | (M+Na)+ |
| 693.172  | 1 | 32.4    | C31H32BrFN6NaO5 | (M+Na)+ |

--- End Of Report ---

### <sup>1</sup>H-NMR spectrum of compound **9c**

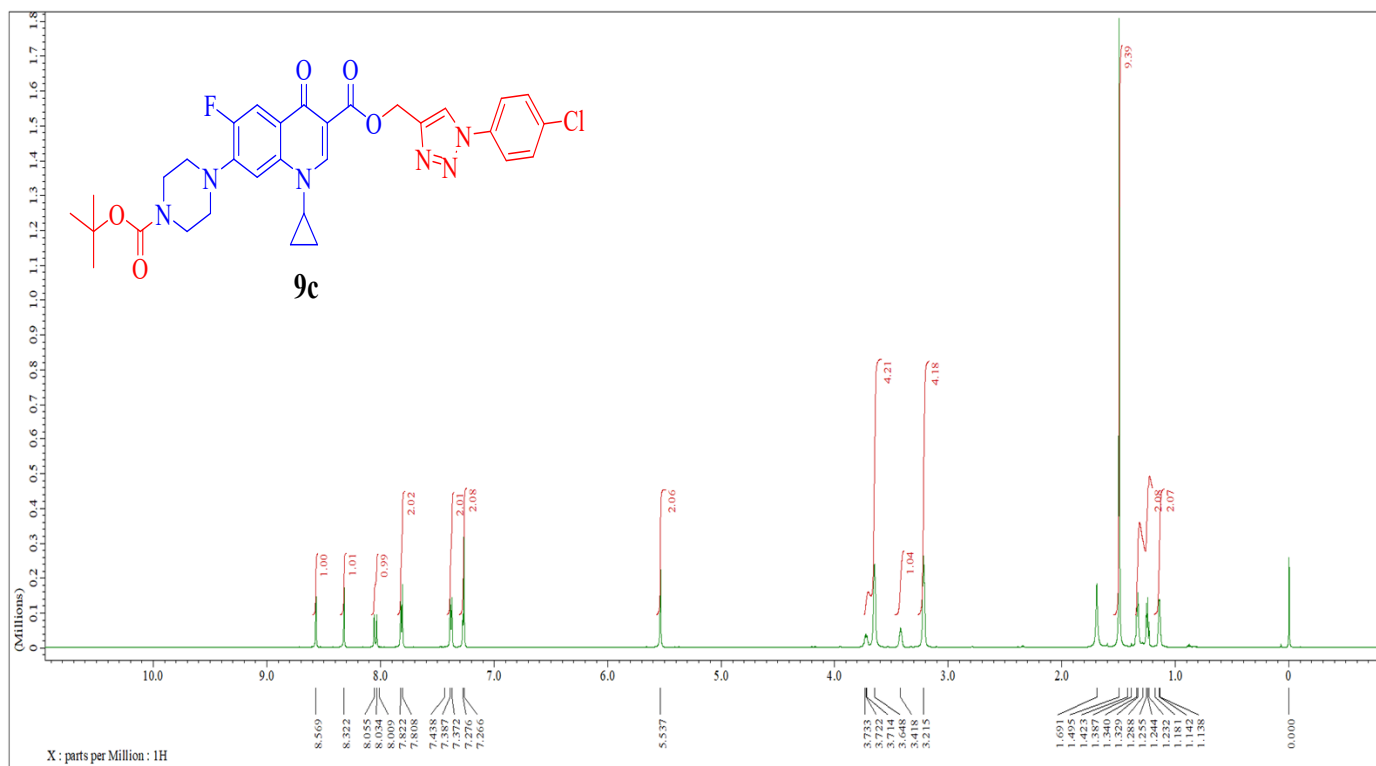

### <sup>13</sup>C-NMR spectrum of compound **9c**

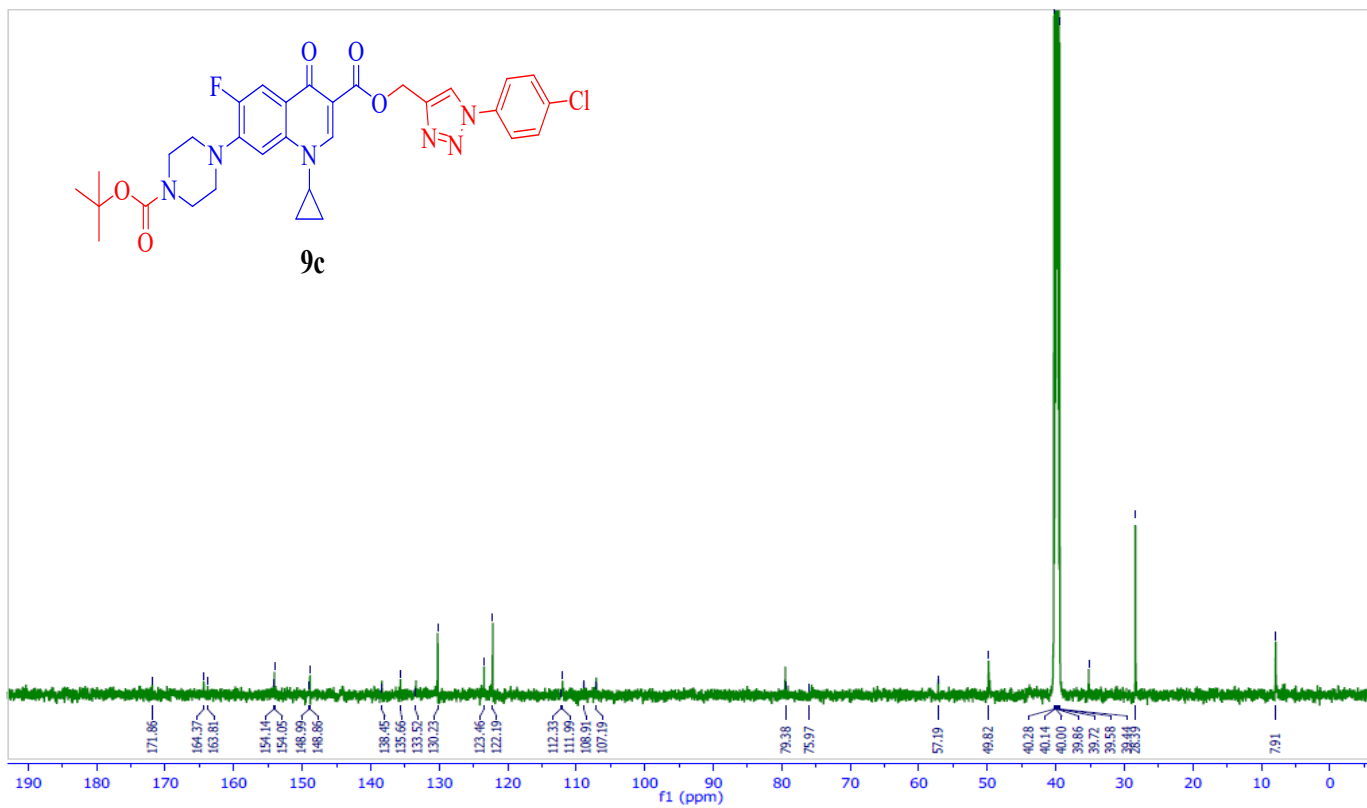

<sup>1</sup>H-NMR spectrum of compound 9d

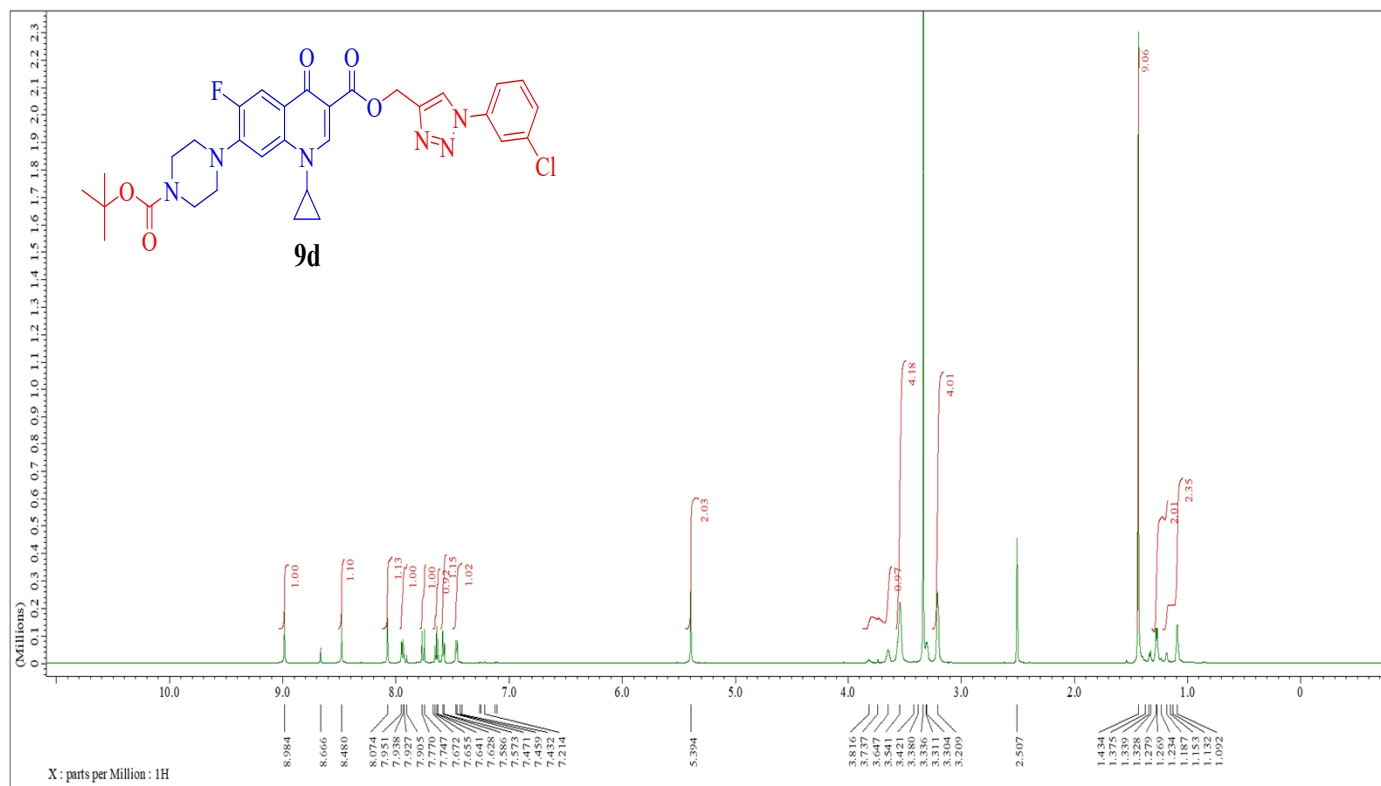

<sup>13</sup>C-NMR spectrum of compound 9d

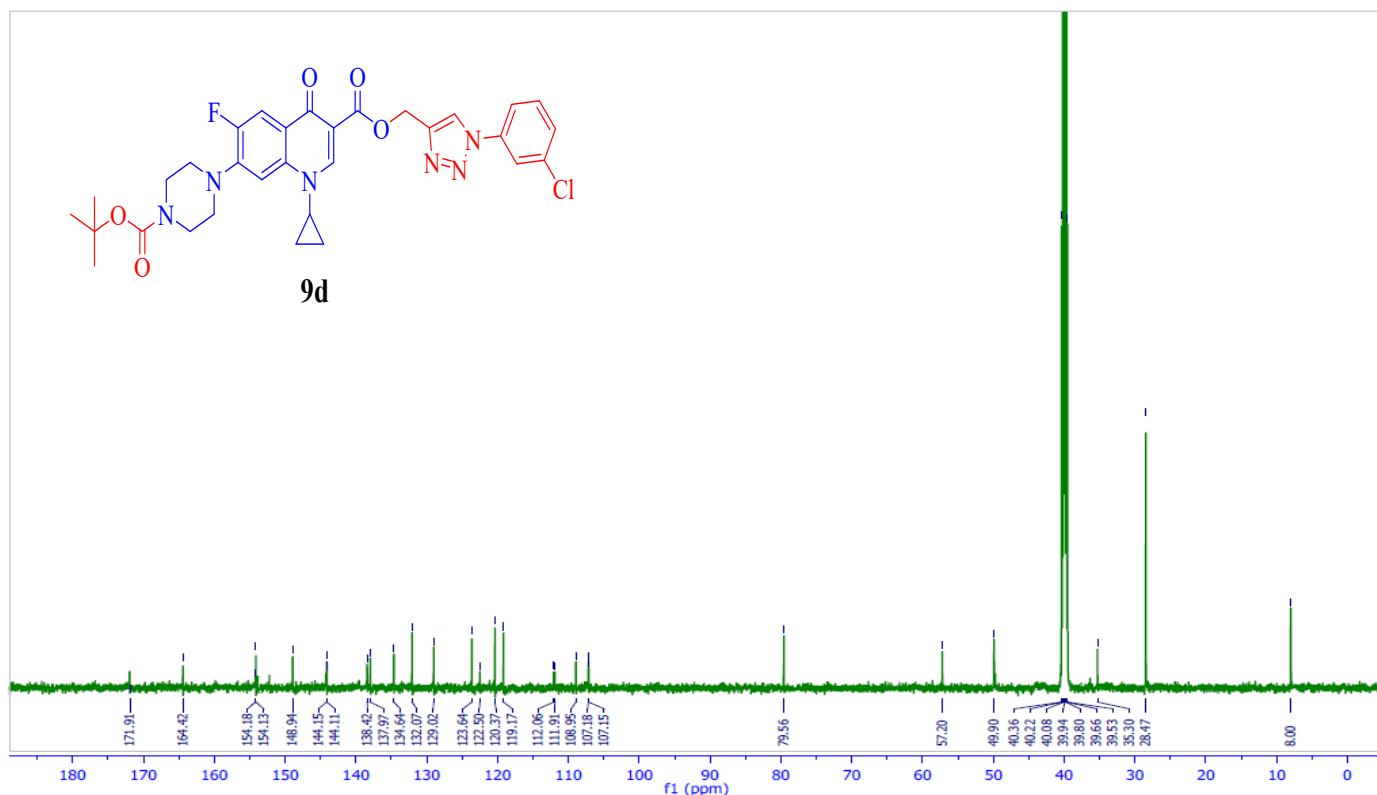

### HRMS of compound 9d

|                               |              |                      |                        |
|-------------------------------|--------------|----------------------|------------------------|
| <b>Data File</b>              | CPR-07.d     | <b>Sample Name</b>   | CPR-07                 |
| <b>Sample Type</b>            | Sample       | <b>Position</b>      | P1-D3                  |
| <b>Instrument Name</b>        | Instrument 1 | <b>User Name</b>     |                        |
| <b>Acq Method</b>             | MS Scan.m    | <b>Acquired Time</b> | 28-12-2022<br>16:37:36 |
| <b>IRM Calibration Status</b> | Success      | <b>DA Method</b>     | Default.m              |

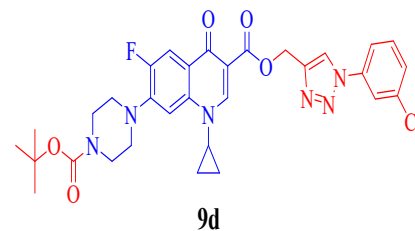

|                               |                                                         |              |   |
|-------------------------------|---------------------------------------------------------|--------------|---|
| <b>Sample Group</b>           |                                                         | <b>Info.</b> | 3 |
| <b>Acquisition SW Version</b> | 6200 series TOF/6500<br>series Q-TOF B.05.01<br>(B5125) |              |   |

### Compound Table

| Compound Label            | RT    | Mass     | Abund | Formula            | Tgt Mass | Diff (ppm) | MFG Formula        | DB Formula         |
|---------------------------|-------|----------|-------|--------------------|----------|------------|--------------------|--------------------|
| Cpd 1: C31 H32 Cl F N6 O5 | 0.193 | 622.2145 | 45475 | C31 H32 Cl F N6 O5 | 622.2107 | 6.16       | C31 H32 Cl F N6 O5 | C31 H32 Cl F N6 O5 |

| Compound Label            | m/z      | RT    | Algorithm       | Mass     |
|---------------------------|----------|-------|-----------------|----------|
| Cpd 1: C31 H32 Cl F N6 O5 | 645.2029 | 0.193 | Find By Formula | 622.2145 |

MS Zoomed Spectrum

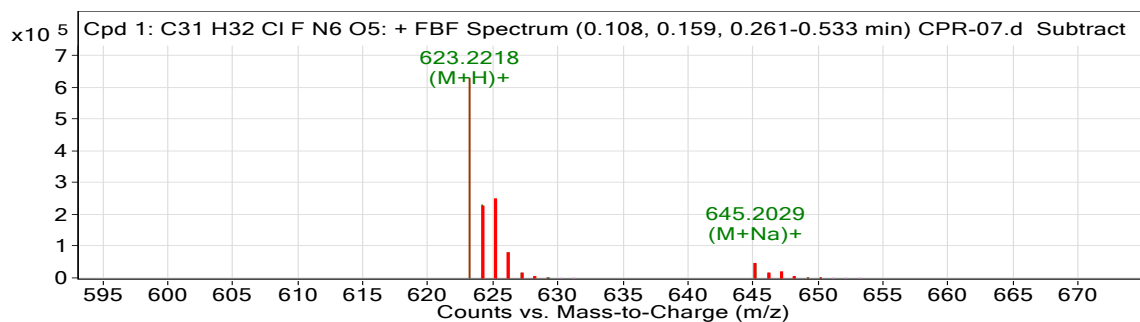

### MS Spectrum Peak List

| <i>m/z</i> | <i>z</i> | Abund     | Formula         | Ion     |
|------------|----------|-----------|-----------------|---------|
| 623.2218   | 1        | 630233.25 | C31H33ClFN6O5   | (M+H)+  |
| 624.2251   | 1        | 228400.81 | C31H33ClFN6O5   | (M+H)+  |
| 625.2207   | 1        | 246488.89 | C31H33ClFN6O5   | (M+H)+  |
| 626.2222   | 1        | 79270.67  | C31H33ClFN6O5   | (M+H)+  |
| 627.2242   | 1        | 15238.84  | C31H33ClFN6O5   | (M+H)+  |
| 628.2269   | 1        | 2054.51   | C31H33ClFN6O5   | (M+H)+  |
| 629.2251   | 1        | 362.38    | C31H33ClFN6O5   | (M+H)+  |
| 645.2029   | 1        | 45474.88  | C31H32ClFN6NaO5 | (M+Na)+ |
| 646.2057   | 1        | 15853.03  | C31H32ClFN6NaO5 | (M+Na)+ |
| 647.2015   | 1        | 16617.12  | C31H32ClFN6NaO5 | (M+Na)+ |
| 648.2037   | 1        | 5387.89   | C31H32ClFN6NaO5 | (M+Na)+ |
| 649.2059   | 1        | 1126.82   | C31H32ClFN6NaO5 | (M+Na)+ |
| 650.2034   | 1        | 158.21    | C31H32ClFN6NaO5 | (M+Na)+ |

--- End Of Report ---

<sup>1</sup>H-  
compound **9e**

NMR spectrum of

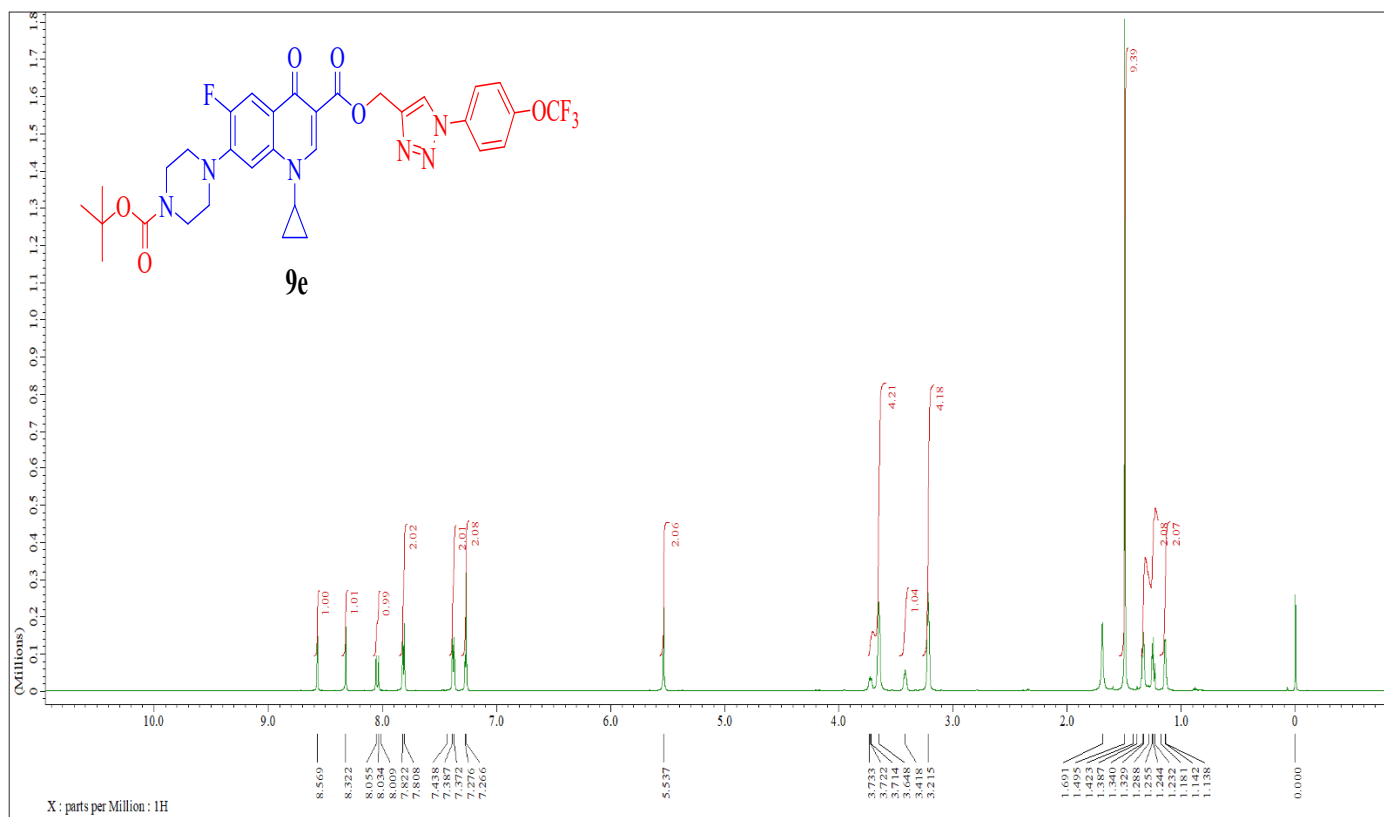

**<sup>13</sup>C-NMR spectrum of compound 9e**

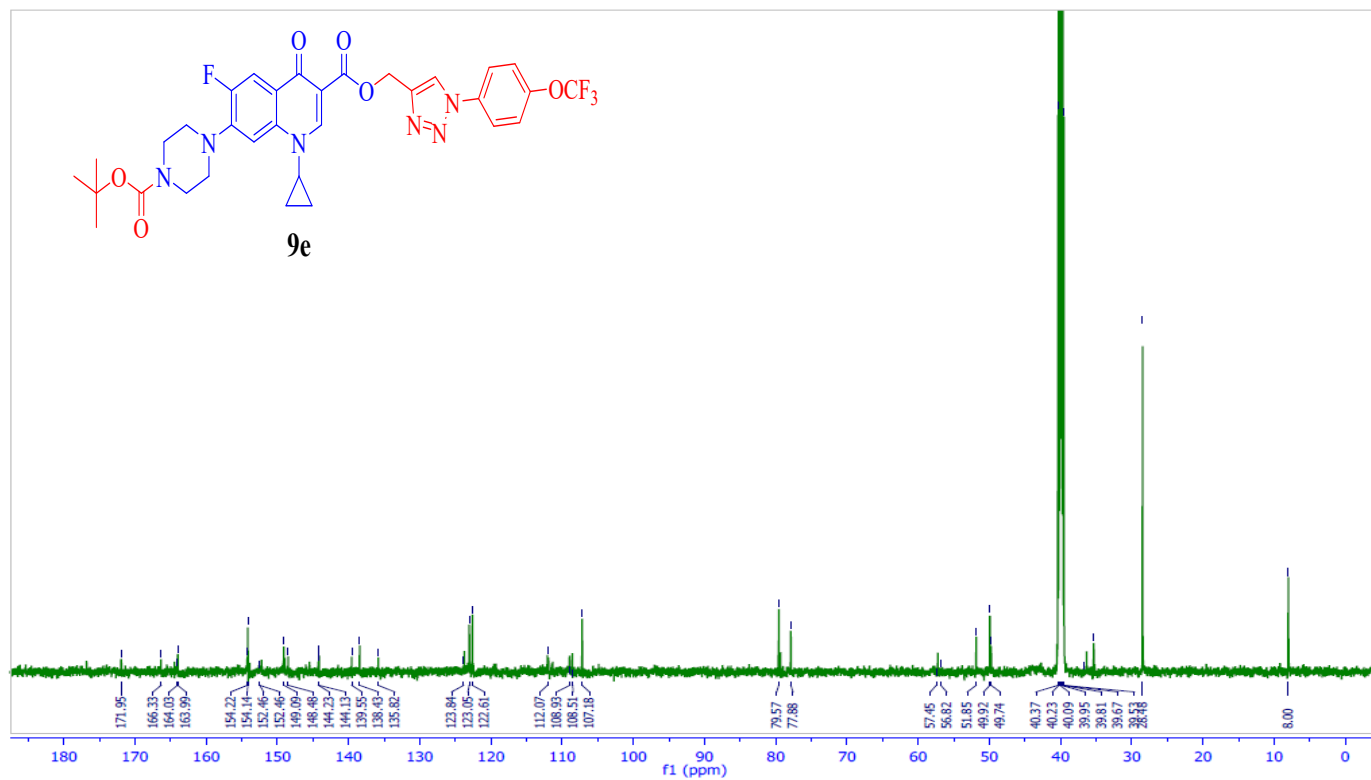

**HRMS of compound 9e**

|                               |              |                      |                        |
|-------------------------------|--------------|----------------------|------------------------|
| <b>Data File</b>              | CPR-08.d     | <b>Sample Name</b>   | CPR-08                 |
| <b>Sample Type</b>            | Sample       | <b>Position</b>      | P1-D4                  |
| <b>Instrument Name</b>        | Instrument 1 | <b>User Name</b>     |                        |
| <b>Acq Method</b>             | MS Scan.m    | <b>Acquired Time</b> | 28-12-2022<br>16:38:20 |
| <b>IRM Calibration Status</b> | Success      | <b>DA Method</b>     | Default.m              |
| <b>Comment</b>                |              |                      |                        |

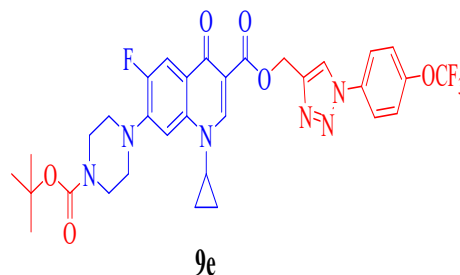

|                               |                                                         |              |   |
|-------------------------------|---------------------------------------------------------|--------------|---|
| <b>Sample Group</b>           |                                                         | <b>Info.</b> | 3 |
| <b>Acquisition SW Version</b> | 6200 series TOF/6500<br>series Q-TOF B.05.01<br>(B5125) |              |   |

### Compound Table

| Compound Label          | RT    | Mass    | Abund | Formula          | Tgt Mass | Diff (ppm) | MFG Formula      | DB Formula       |
|-------------------------|-------|---------|-------|------------------|----------|------------|------------------|------------------|
| Cpd 1: C32 H32 F4 N6 O6 | 0.205 | 672.236 | 14339 | C32 H32 F4 N6 O6 | 672.2319 | 5.98       | C32 H32 F4 N6 O6 | C32 H32 F4 N6 O6 |

| Compound Label          | m/z      | RT    | Algorithm       | Mass    |
|-------------------------|----------|-------|-----------------|---------|
| Cpd 1: C32 H32 F4 N6 O6 | 695.2243 | 0.205 | Find By Formula | 672.236 |

### MS Zoomed Spectrum

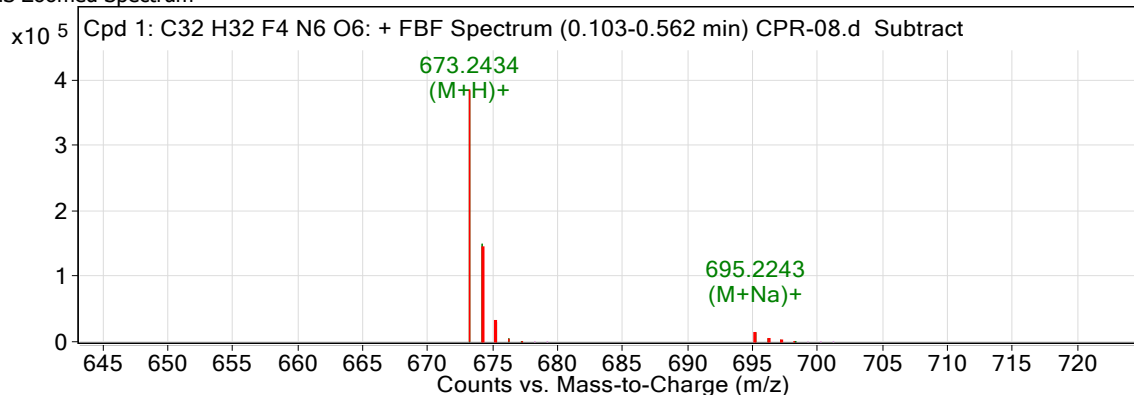

### MS Spectrum Peak List

| m/z      | z | Abund     | Formula        | Ion     |
|----------|---|-----------|----------------|---------|
| 673.2434 | 1 | 383980.75 | C32H33F4N6O6   | (M+H)+  |
| 674.2461 | 1 | 148412.72 | C32H33F4N6O6   | (M+H)+  |
| 675.2483 | 1 | 29916.4   | C32H33F4N6O6   | (M+H)+  |
| 676.2509 | 1 | 4662.44   | C32H33F4N6O6   | (M+H)+  |
| 677.2529 | 1 | 625.35    | C32H33F4N6O6   | (M+H)+  |
| 695.2243 | 1 | 14338.55  | C32H32F4N6NaO6 | (M+Na)+ |
| 696.2271 | 1 | 5335.1    | C32H32F4N6NaO6 | (M+Na)+ |
| 697.2317 | 1 | 1204.33   | C32H32F4N6NaO6 | (M+Na)+ |
| 698.2398 | 1 | 185.15    | C32H32F4N6NaO6 | (M+Na)+ |

--- End Of Report ---

<sup>1</sup>H-NMR spectrum of compound **9f**

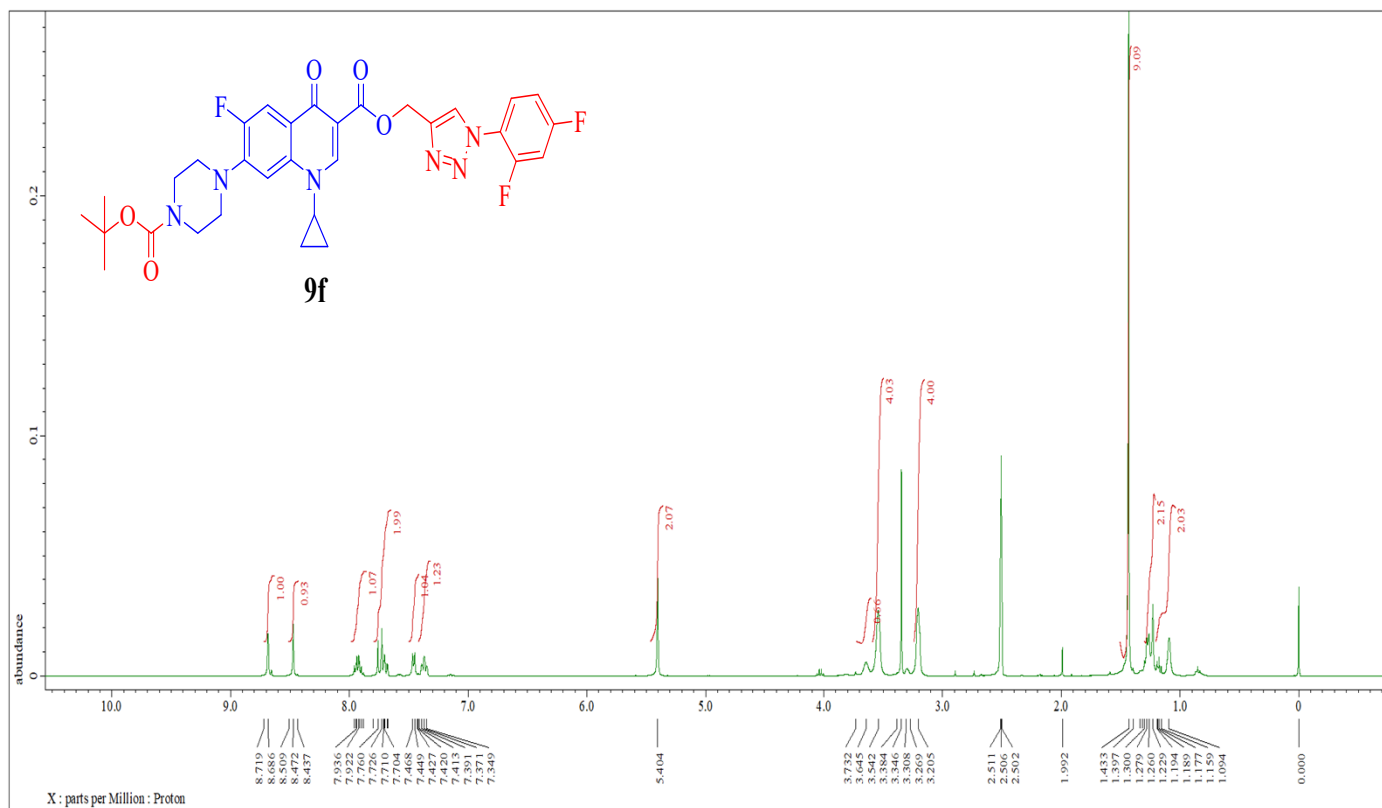

<sup>13</sup>C-NMR spectrum of compound **9f**

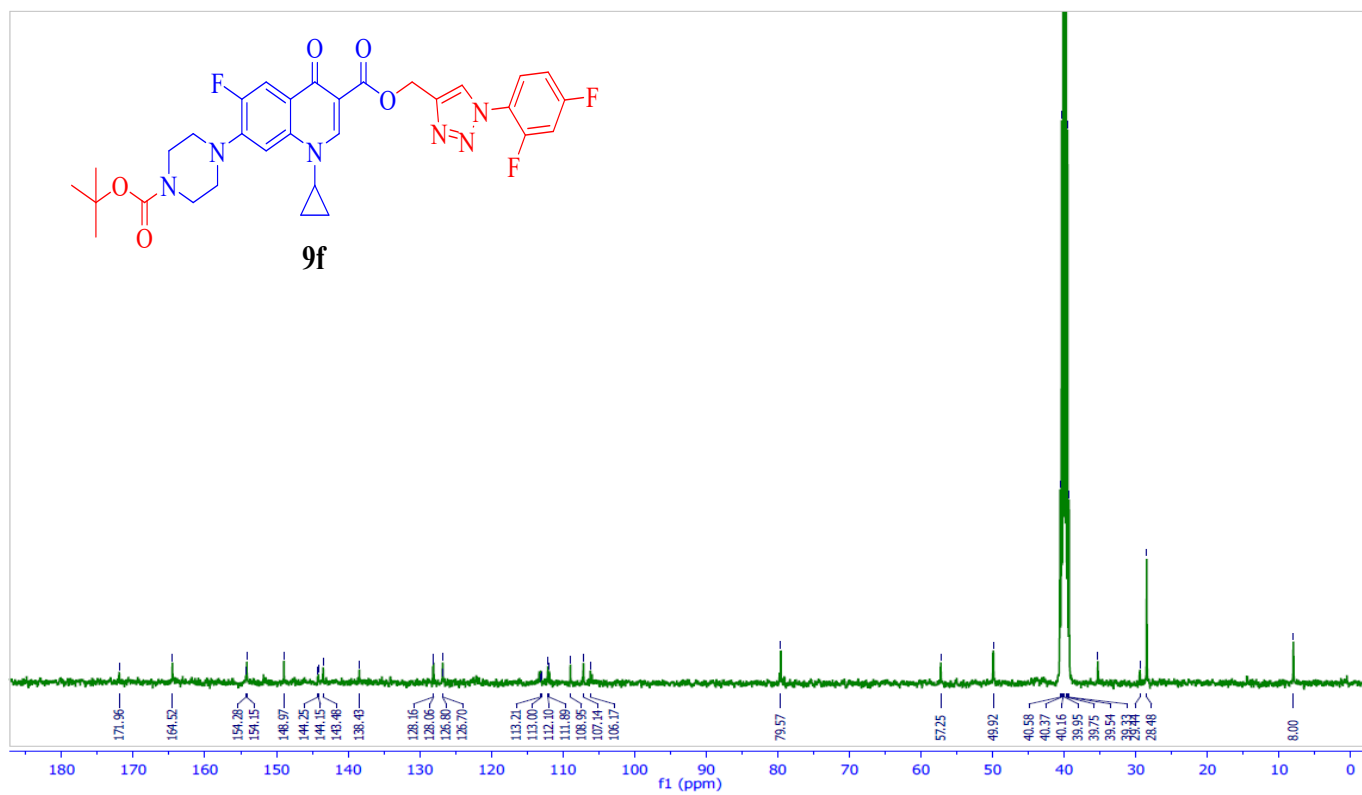

HRMS of compound **9f**



|                               |              |                      |                        |
|-------------------------------|--------------|----------------------|------------------------|
| <b>Data File</b>              | CPR-09.d     | <b>Sample Name</b>   | CPR-09                 |
| <b>Sample Type</b>            | Sample       | <b>Position</b>      | P1-B9                  |
| <b>Instrument Name</b>        | Instrument 1 | <b>User Name</b>     |                        |
| <b>Acq Method</b>             | MS Scan.m    | <b>Acquired Time</b> | 24-05-2023<br>13:45:33 |
| <b>IRM Calibration Status</b> | Success      | <b>DA Method</b>     | Default.m              |
| <b>Comment</b>                |              |                      |                        |

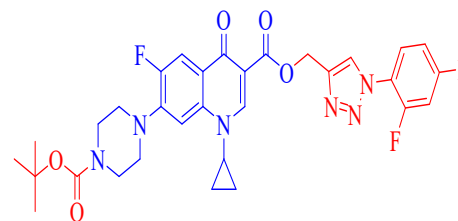

9f

|                               |                                                   |              |   |
|-------------------------------|---------------------------------------------------|--------------|---|
| <b>Sample Group</b>           |                                                   | <b>Info.</b> | 3 |
| <b>Acquisition SW Version</b> | 6200 series TOF/6500 series Q-TOF B.05.01 (B5125) |              |   |

### Compound Table

| Compound Label          | RT    | Mass     | Abund  | Formula          | Tgt Mass | Diff (ppm) | MFG Formula      | DB Formula       |
|-------------------------|-------|----------|--------|------------------|----------|------------|------------------|------------------|
| Cpd 1: C31 H31 F3 N6 O5 | 0.098 | 624.2284 | 110742 | C31 H31 F3 N6 O5 | 624.2308 | -3.87      | C31 H31 F3 N6 O5 | C31 H31 F3 N6 O5 |

| Compound Label          | m/z      | RT    | Algorithm       | Mass     |
|-------------------------|----------|-------|-----------------|----------|
| Cpd 1: C31 H31 F3 N6 O5 | 625.2357 | 0.098 | Find By Formula | 624.2284 |

### MS Zoomed Spectrum

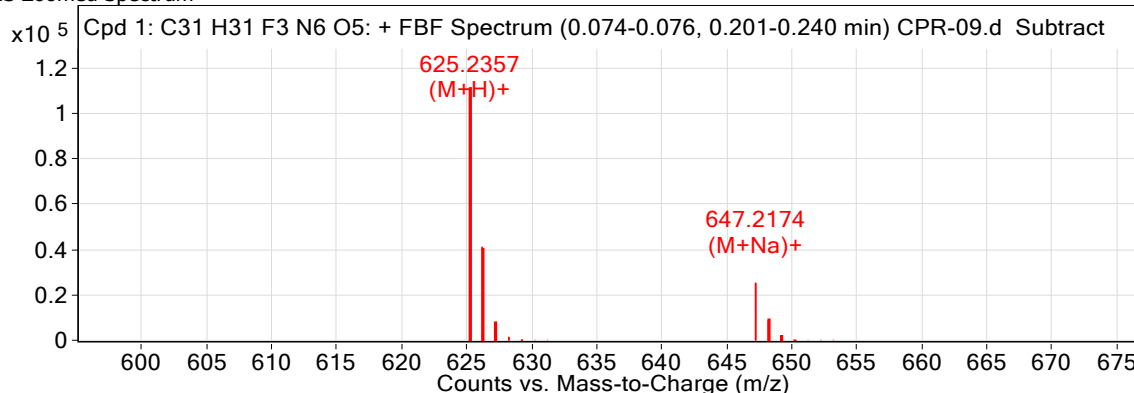

### MS Spectrum Peak List

| m/z      | z | Abund     | Formula        | Ion                 |
|----------|---|-----------|----------------|---------------------|
| 625.2357 | 1 | 110742.09 | C31H32F3N6O5   | (M+H) <sup>+</sup>  |
| 626.239  | 1 | 40953.04  | C31H32F3N6O5   | (M+H) <sup>+</sup>  |
| 627.2412 | 1 | 7987.41   | C31H32F3N6O5   | (M+H) <sup>+</sup>  |
| 628.2438 | 1 | 1142.87   | C31H32F3N6O5   | (M+H) <sup>+</sup>  |
| 629.2457 | 1 | 71.75     | C31H32F3N6O5   | (M+H) <sup>+</sup>  |
| 647.2174 | 1 | 25471.64  | C31H31F3N6NaO5 | (M+Na) <sup>+</sup> |
| 648.2201 | 1 | 8874.06   | C31H31F3N6NaO5 | (M+Na) <sup>+</sup> |
| 649.2228 | 1 | 1592.32   | C31H31F3N6NaO5 | (M+Na) <sup>+</sup> |
| 650.2248 | 1 | 221.78    | C31H31F3N6NaO5 | (M+Na) <sup>+</sup> |

--- End Of Report ---

<sup>1</sup>H-NMR spectrum of compound 10

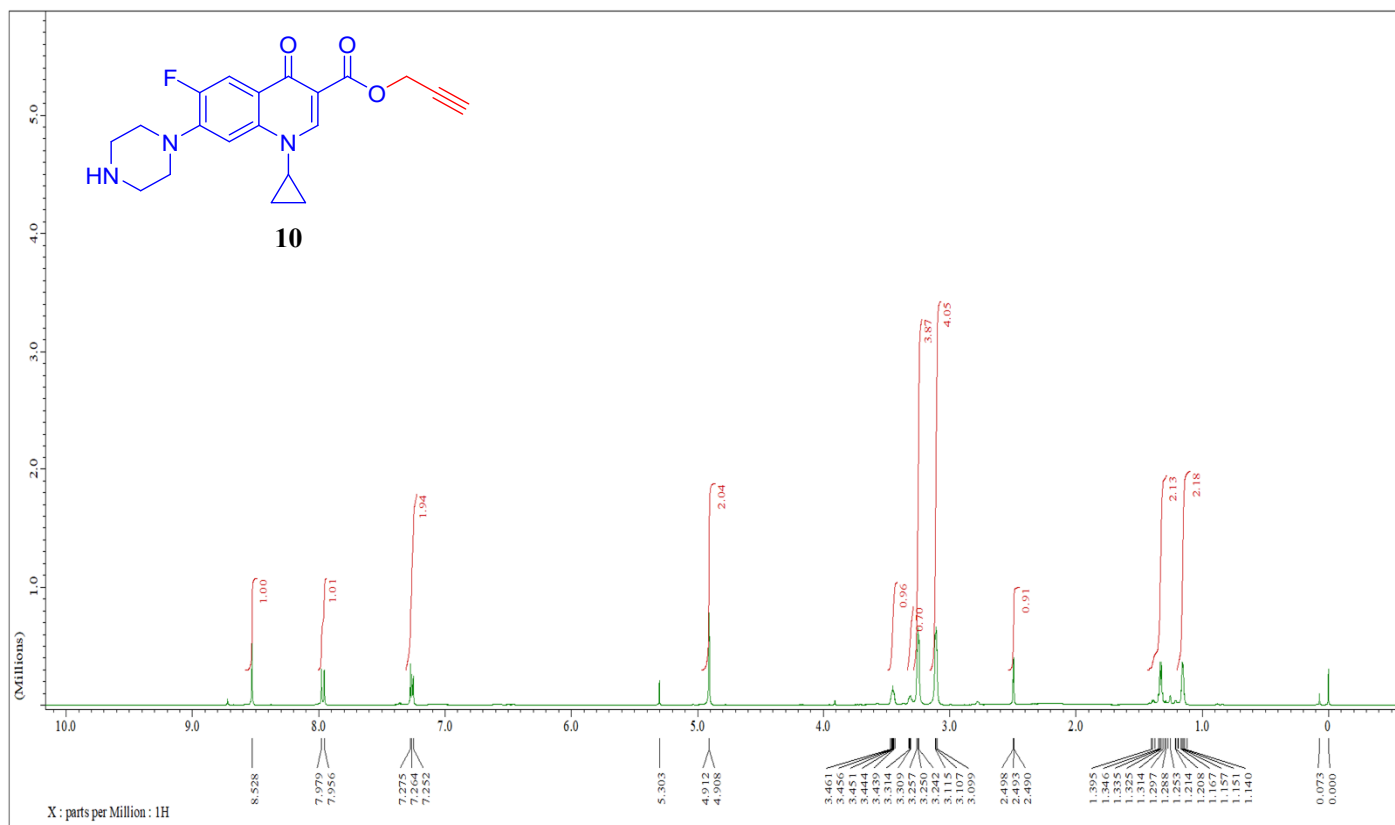

<sup>13</sup>C-NMR spectrum of compound **10**

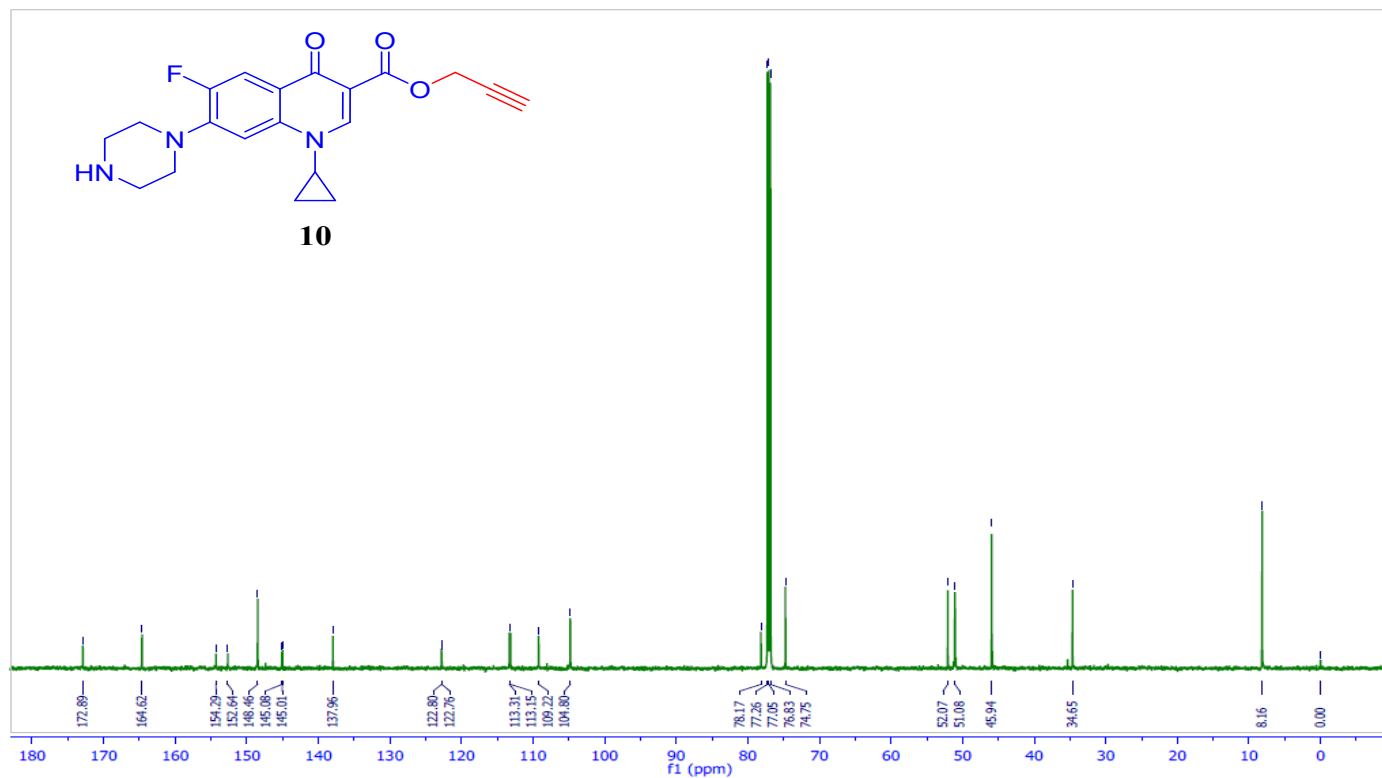

<sup>19</sup>F-NMR spectrum of compound **10**

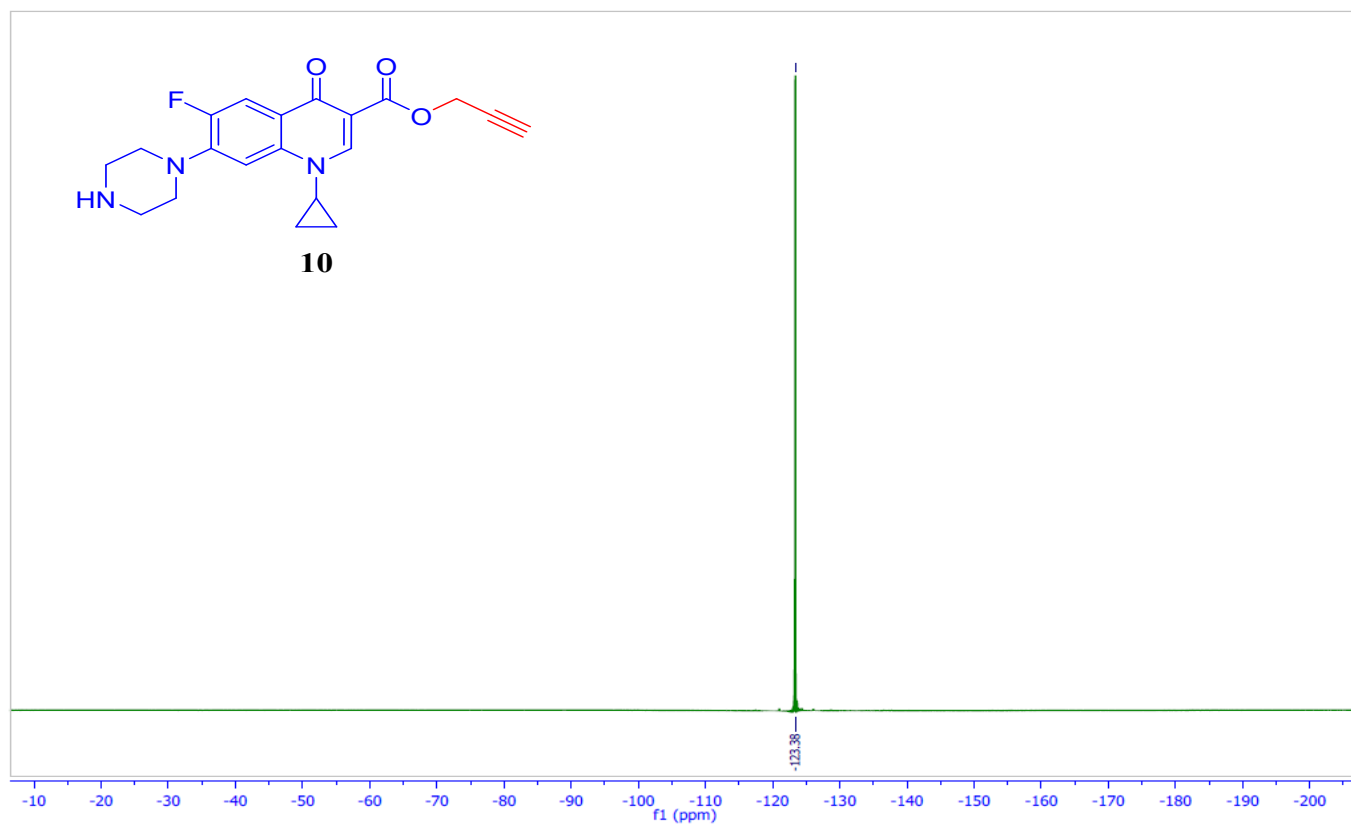

IR spectrum of compound **10**

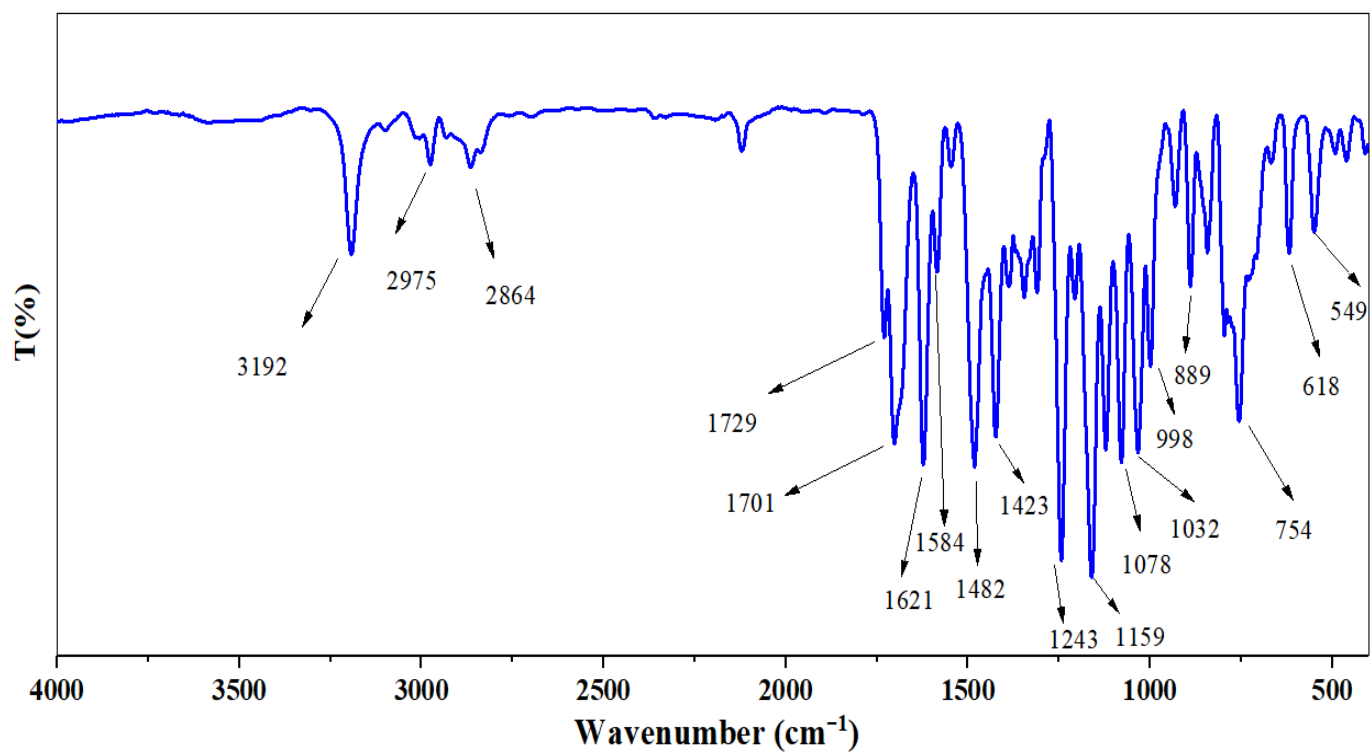

HRMS spectrum of compound **10**

|                               |              |                      |                     |
|-------------------------------|--------------|----------------------|---------------------|
| <b>Data File</b>              | CPR-10.d     | <b>Sample Name</b>   | CPR-10              |
| <b>Sample Type</b>            | Sample       | <b>Position</b>      | P1-E9               |
| <b>Instrument Name</b>        | Instrument 1 | <b>User Name</b>     |                     |
| <b>Acq Method</b>             | MS Scan.m    | <b>Acquired Time</b> | 28-12-2022 17:12:39 |
| <b>IRM Calibration Status</b> | Success      | <b>DA Method</b>     | Default.m           |

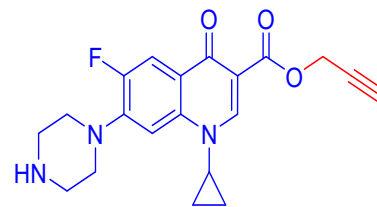

**10**

|                               |                                                             |              |   |
|-------------------------------|-------------------------------------------------------------|--------------|---|
| <b>Sample Group</b>           |                                                             | <b>Info.</b> | 3 |
| <b>Acquisition SW Version</b> | 6200 series<br>TOF/6500 series Q-<br>TOF B.05.01<br>(B5125) |              |   |

**Compound Table**

| Compound Label         | RT   | Mass     | Abund | Formula         | Tgt Mass | Diff (ppm) | MFG Formula     | DB Formula      |
|------------------------|------|----------|-------|-----------------|----------|------------|-----------------|-----------------|
| Cpd 1: C20 H20 F N3 O3 | 0.14 | 369.1509 | 86939 | C20 H20 F N3 O3 | 369.1489 | 5.6        | C20 H20 F N3 O3 | C20 H20 F N3 O3 |

| Compound Label         | m/z      | RT   | Algorithm       | Mass     |
|------------------------|----------|------|-----------------|----------|
| Cpd 1: C20 H20 F N3 O3 | 392.1397 | 0.14 | Find By Formula | 369.1509 |

MS Zoomed Spectrum

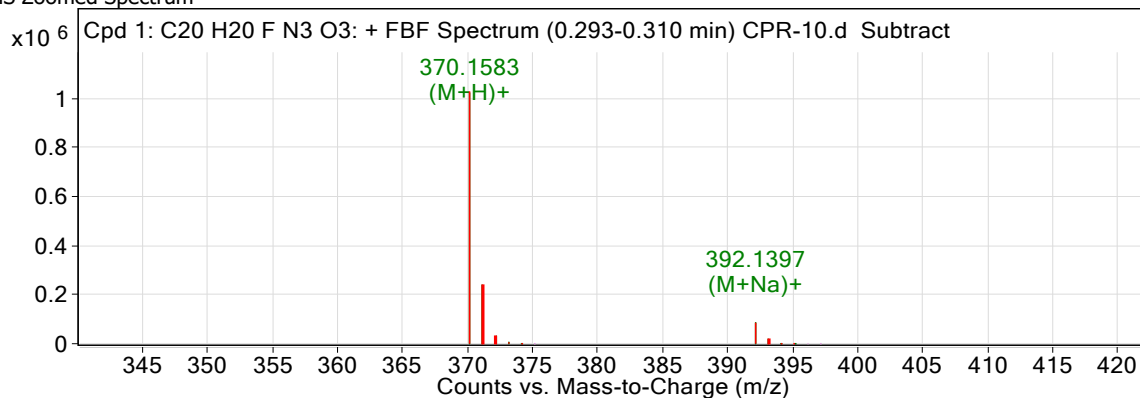

**MS Spectrum Peak List**

| m/z      | z | Abund      | Formula       | Ion     |
|----------|---|------------|---------------|---------|
| 370.1583 | 1 | 1024152.25 | C20H21FN3O3   | (M+H)+  |
| 371.1613 | 1 | 241879.64  | C20H21FN3O3   | (M+H)+  |
| 372.1636 | 1 | 32302.36   | C20H21FN3O3   | (M+H)+  |
| 373.1653 | 1 | 3716.09    | C20H21FN3O3   | (M+H)+  |
| 374.16   | 1 | 635.4      | C20H21FN3O3   | (M+H)+  |
| 392.1397 | 1 | 86939.17   | C20H20FN3NaO3 | (M+Na)+ |
| 393.1429 | 1 | 18818.83   | C20H20FN3NaO3 | (M+Na)+ |
| 394.1443 | 1 | 2822.77    | C20H20FN3NaO3 | (M+Na)+ |
| 395.1512 | 1 | 334.69     | C20H20FN3NaO3 | (M+Na)+ |

--- End Of Report ---

<sup>1</sup>H-NMR spectrum of compound **10a**

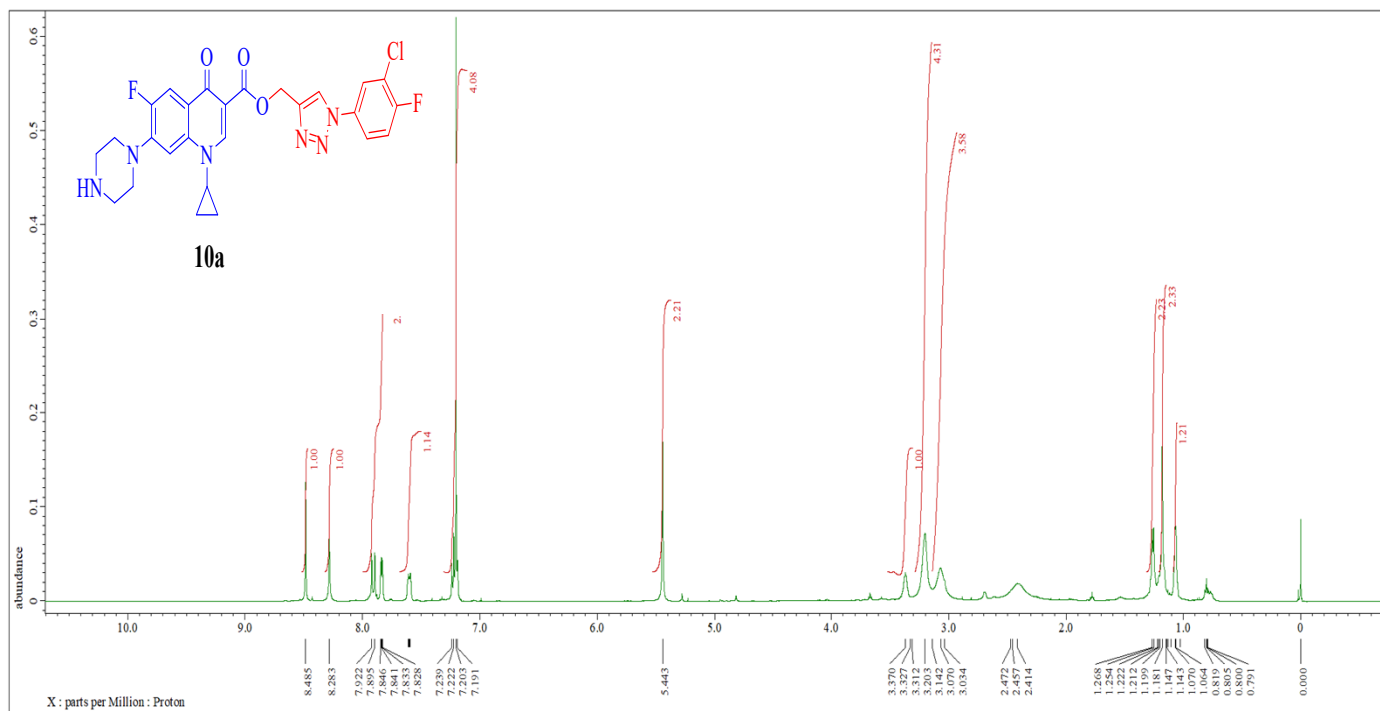

<sup>13</sup>C-NMR spectrum of compound 10a

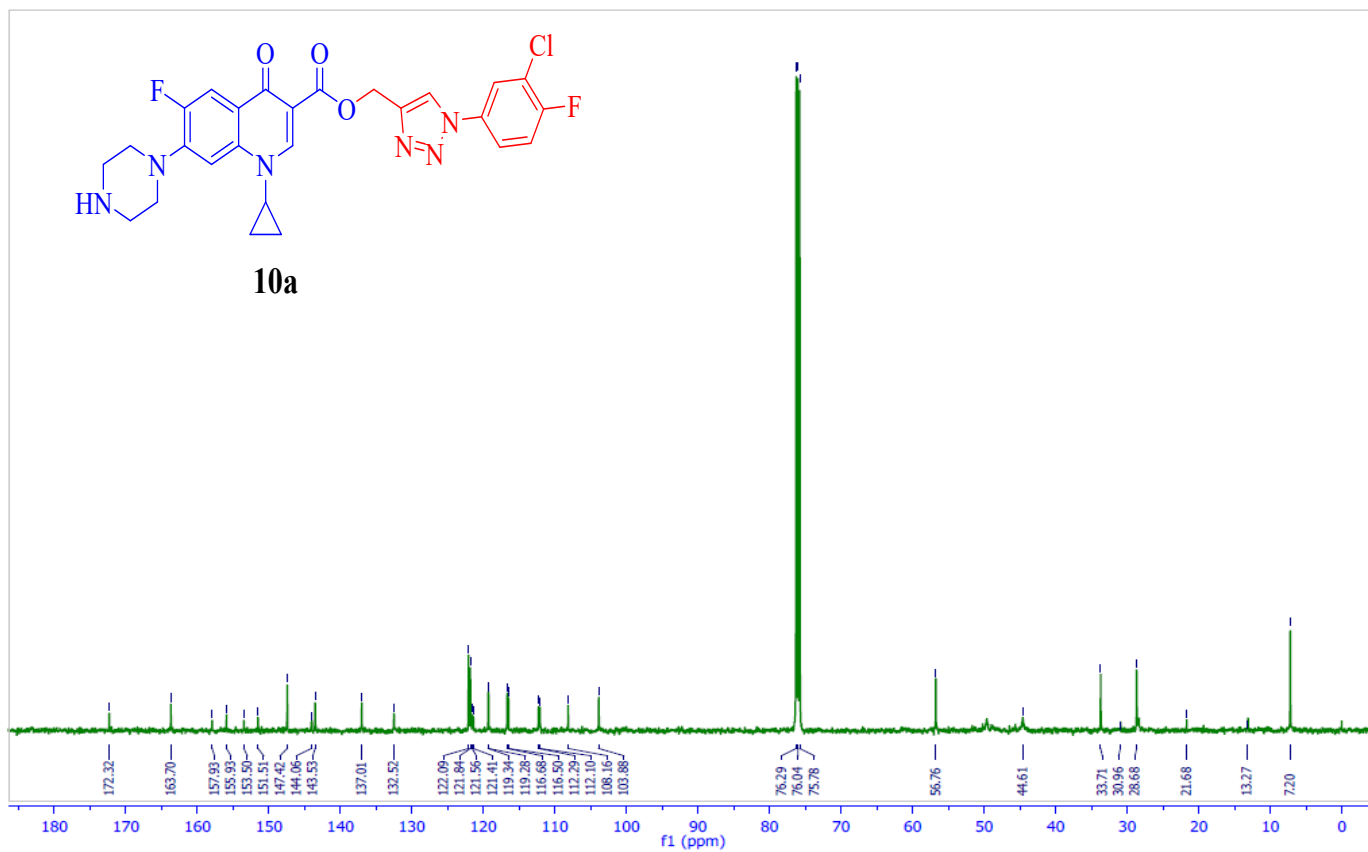

<sup>19</sup>F-NMR spectrum of compound 10a

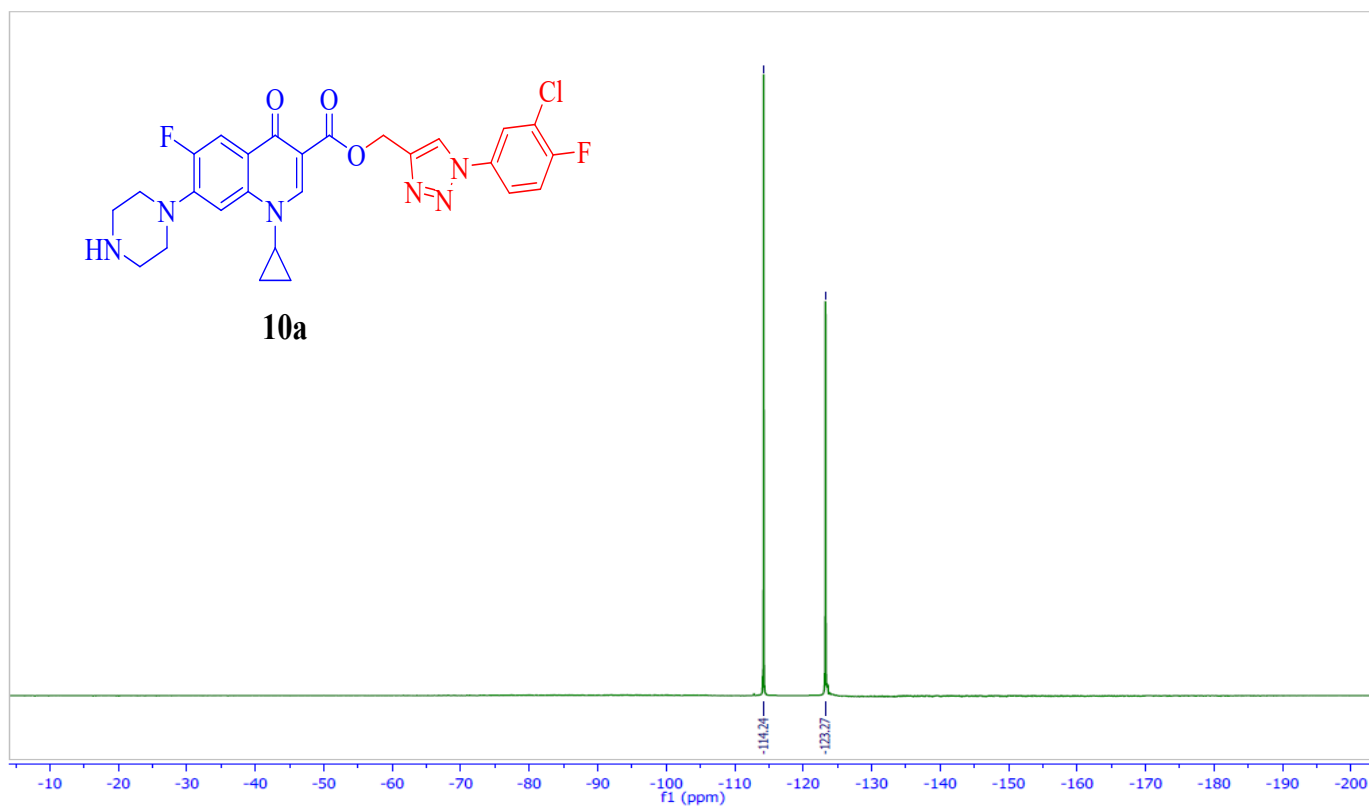

IR spectrum of compound **10a**

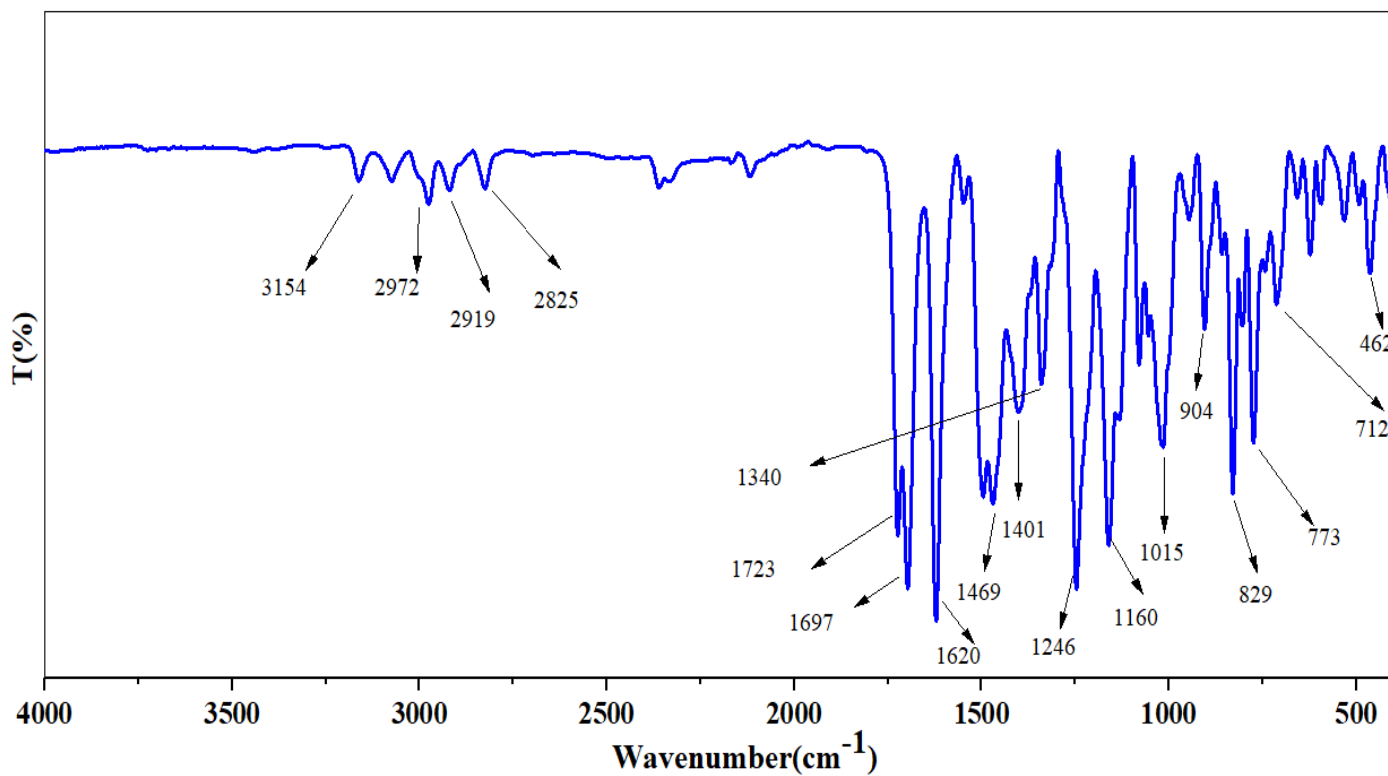

HRMS spectrum of compound **10a**

**Data File** CPR-11.d  
**Sample Type** Sample  
**Instrument Name** Instrument 1  
**Acq Method** MS Scan.m  
**IRM Calibration Status** Success  
**Comment**

**Sample Name** CPR-11  
**Position** P1-F1  
**User Name**  
**Acquired Time** 28-12-2022 17:13:25  
**DA** Default.m  
**Method**

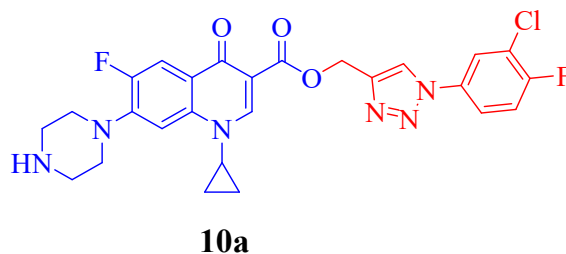

**Sample Group** Info. 3  
**Acquisition** 6200 series  
**SW Version** TOF/6500 series Q-TOF B.05.01 (B5125)

### Compound Table

| Compound Label             | RT    | Mass     | Abund | Formula             | Tgt Mass | Diff (ppm) | MFG Formula        | DB Formula         |
|----------------------------|-------|----------|-------|---------------------|----------|------------|--------------------|--------------------|
| Cpd 1: C26 H23 Cl F2 N6 O3 | 0.142 | 540.1509 | 41520 | C26 H23 Cl F2 N6 O3 | 540.1488 | 3.91       | C26 H23 Cl F2 N6O3 | C26 H23 Cl F2N6 O3 |

| Compound Label             | m/z      | RT    | Algorithm       | Mass     |
|----------------------------|----------|-------|-----------------|----------|
| Cpd 1: C26 H23 Cl F2 N6 O3 | 563.1396 | 0.142 | Find By Formula | 540.1509 |

### MS Zoomed Spectrum

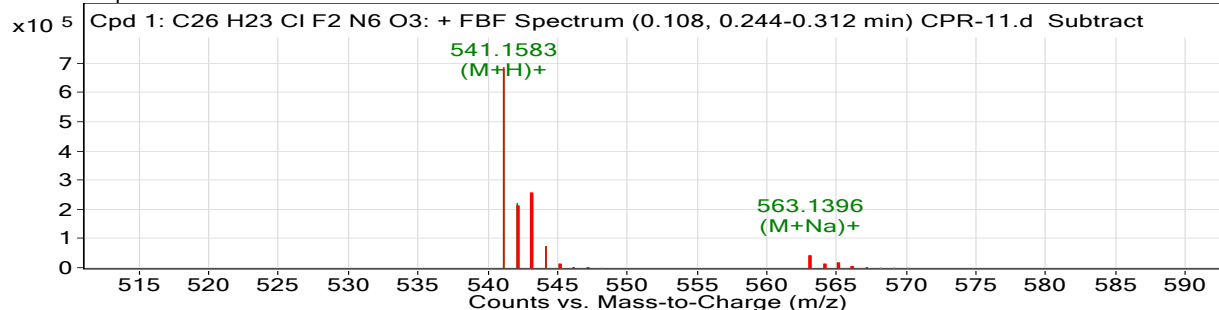

### MS Spectrum Peak List

| m/z      | z | Abund     | Formula          | Ion     |
|----------|---|-----------|------------------|---------|
| 541.1583 | 1 | 678966.5  | C26H24ClF2N6O3   | (M+H)+  |
| 542.1611 | 1 | 220922.38 | C26H24ClF2N6O3   | (M+H)+  |
| 543.1566 | 1 | 251685.33 | C26H24ClF2N6O3   | (M+H)+  |
| 544.1583 | 1 | 71574.27  | C26H24ClF2N6O3   | (M+H)+  |
| 545.1601 | 1 | 11766.89  | C26H24ClF2N6O3   | (M+H)+  |
| 546.1605 | 1 | 1391.89   | C26H24ClF2N6O3   | (M+H)+  |
| 547.1576 | 1 | 356.16    | C26H24ClF2N6O3   | (M+H)+  |
| 563.1396 | 1 | 41520.03  | C26H23ClF2N6NaO3 | (M+Na)+ |
| 564.1423 | 1 | 12342.22  | C26H23ClF2N6NaO3 | (M+Na)+ |
| 565.1376 | 1 | 14865.63  | C26H23ClF2N6NaO3 | (M+Na)+ |
| 566.1406 | 1 | 4344.81   | C26H23ClF2N6NaO3 | (M+Na)+ |
| 567.1353 | 1 | 970.44    | C26H23ClF2N6NaO3 | (M+Na)+ |

--- End Of Report ---

<sup>1</sup>H-NMR spectrum of compound 10b

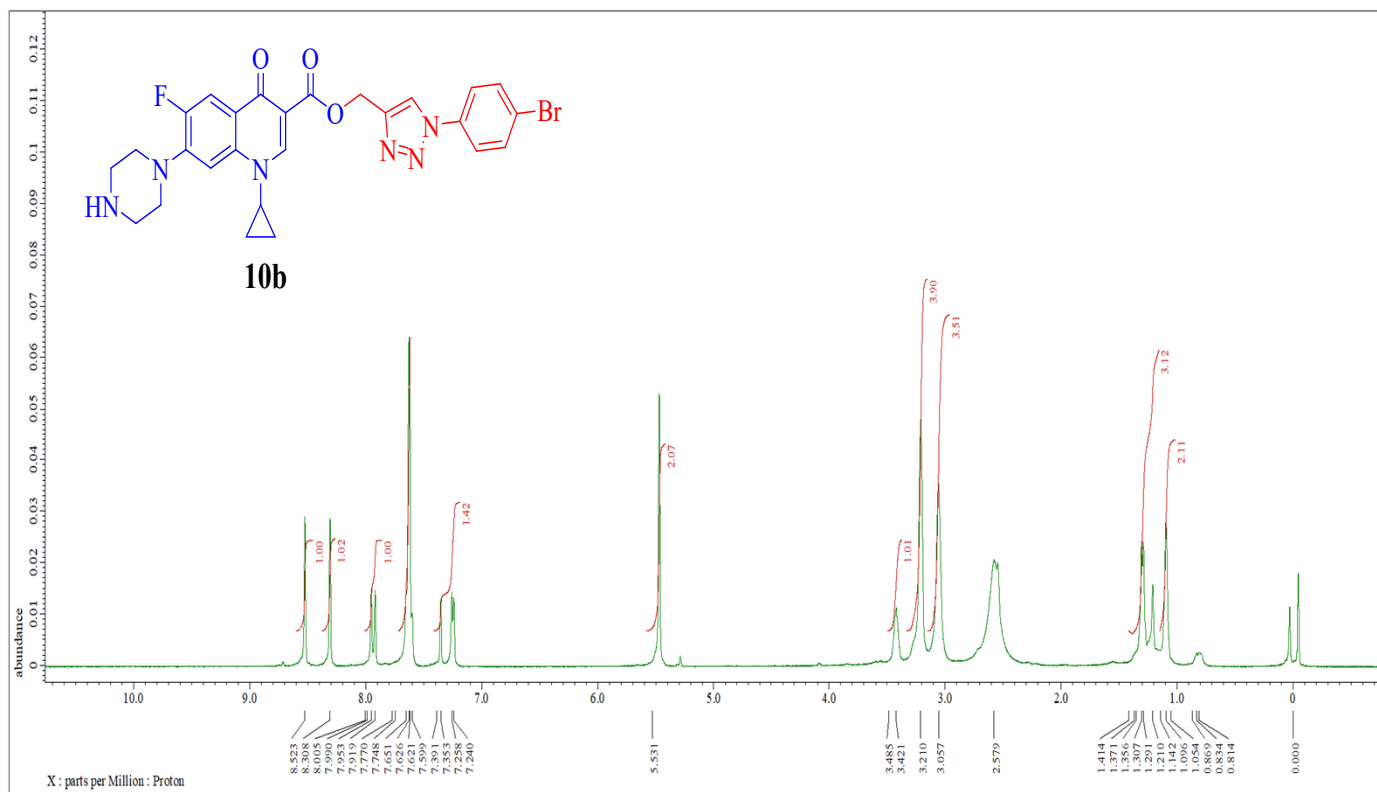

<sup>13</sup>C-NMR spectrum of compound **10b**

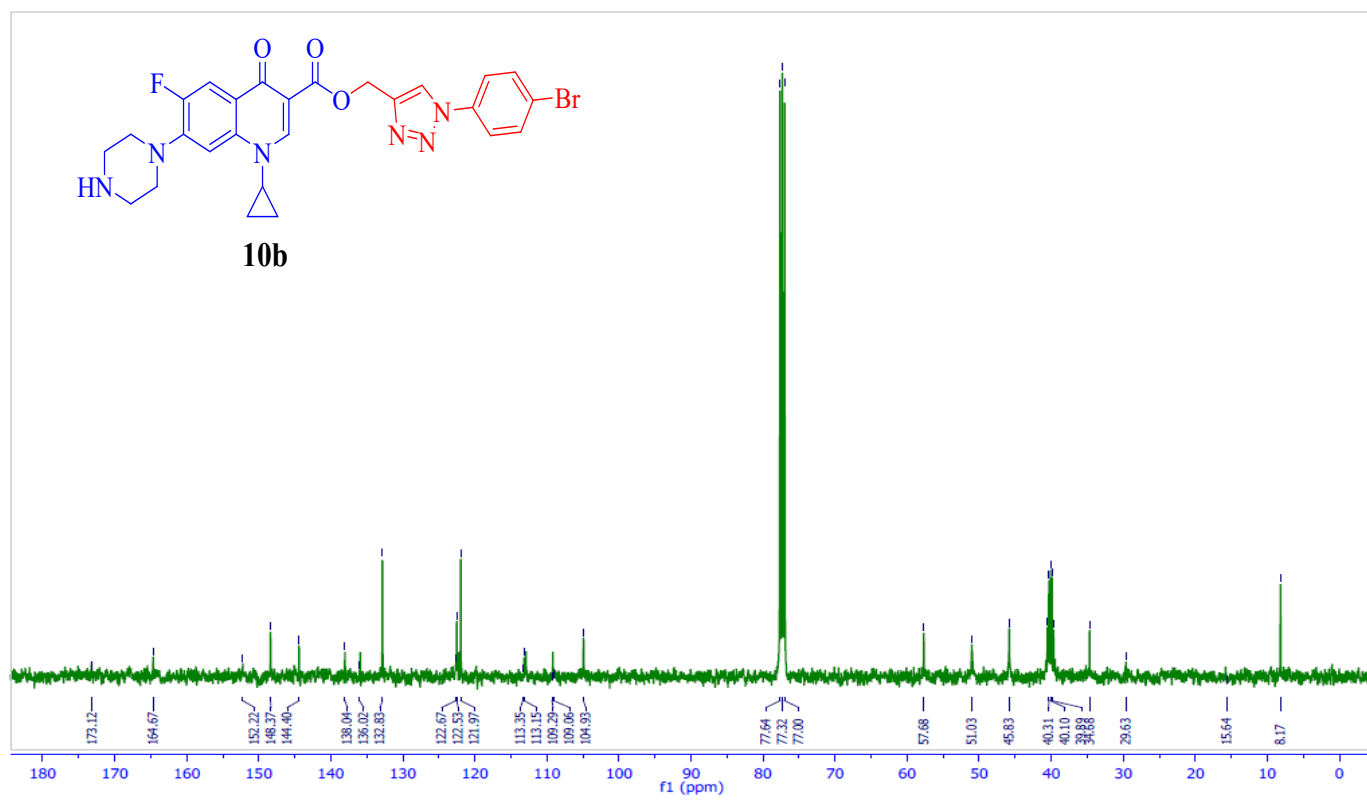

IR spectrum of compound **10b**



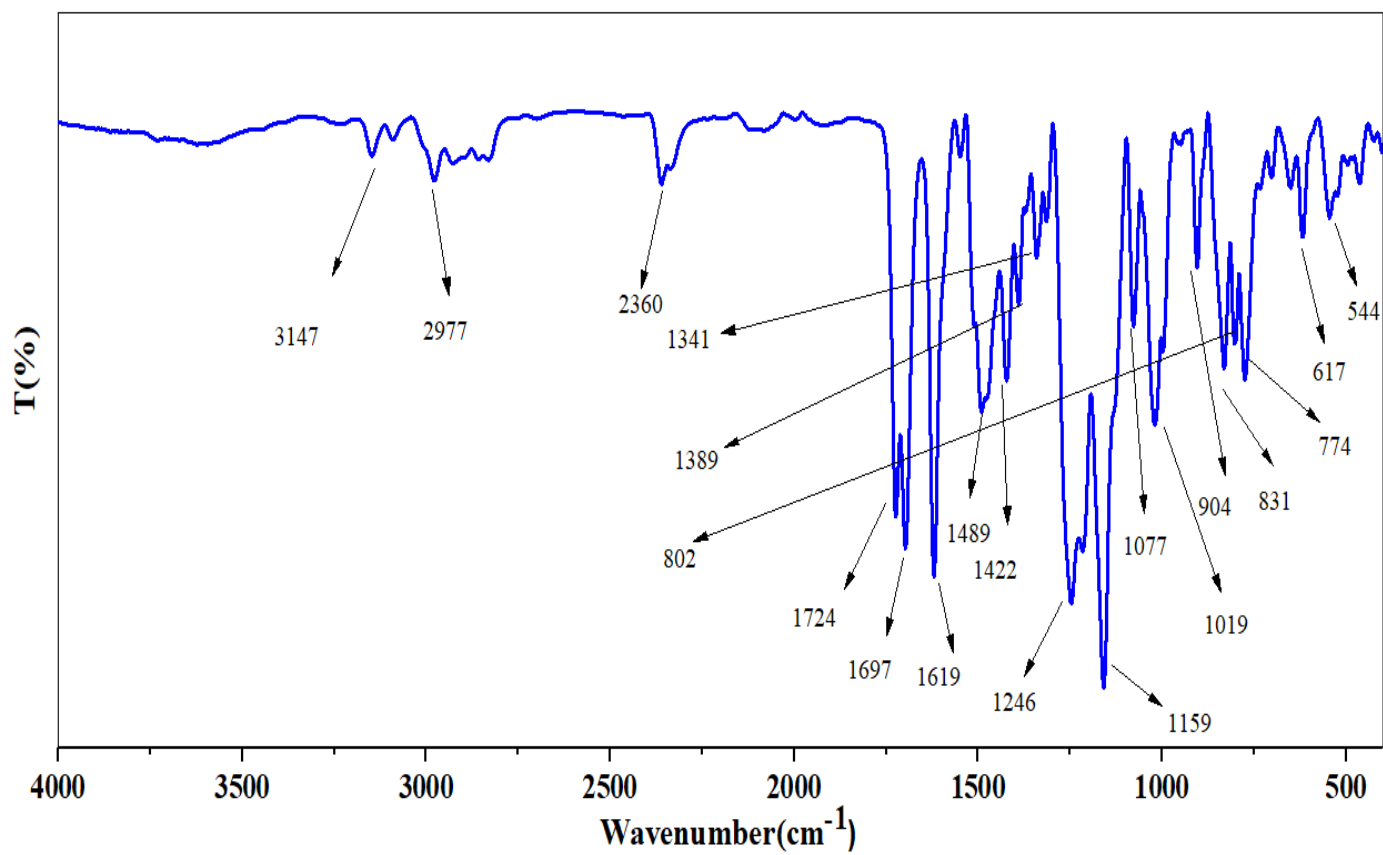

HRMS spectrum of compound **10b**

**Data File** CPR-012.d **Sample Name** CPR-012  
**Sample Type** Sample **Sample Name Position** P1-A4  
**Instrument Name** Instrument 1 **User Name**  
**Acq Method** MS Scan.m **Acquired Time** 29-12-2022 12:43:56  
**IRM Calibration Status** Success **DA Method** Default.m  
**Comment**

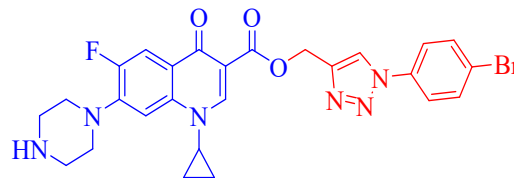

10b

**Sample Group** Info. 3  
**Acquisition SW** 6200 series  
**Version** TOF/6500 series Q-  
 TOF B.05.01  
 (B5125)

**Compound Table**

| Compound Label          | RT    | Mass     | Abund | Formula            | Tgt Mass | Diff (ppm) | MFG Formula        | DB Formula         |
|-------------------------|-------|----------|-------|--------------------|----------|------------|--------------------|--------------------|
| Cpd 1: C26 H24 Br FN6O3 | 0.179 | 566.1097 | 34994 | C26 H24 Br F N6 O3 | 566.1077 | 3.56       | C26 H24 Br F N6 O3 | C26 H24 Br F N6 O3 |

| Compound Label            | m/z      | RT    | Algorithm       | Mass     |
|---------------------------|----------|-------|-----------------|----------|
| Cpd 1: C26 H24 Br F N6 O3 | 589.0982 | 0.179 | Find By Formula | 566.1097 |

MS Zoomed Spectrum

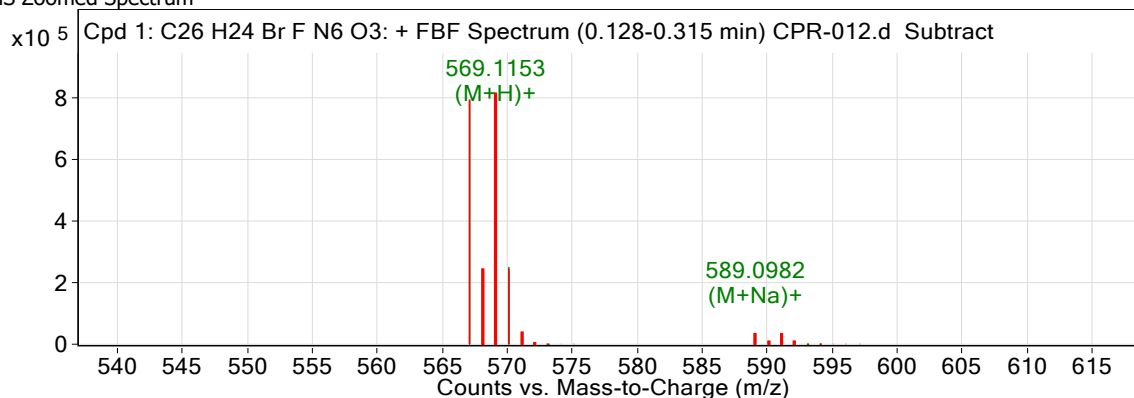

**MS Spectrum Peak List**

| m/z      | z | Abund     | Formula         | Ion     |
|----------|---|-----------|-----------------|---------|
| 567.1171 | 1 | 789732.19 | C26H25BrFN6O3   | (M+H)+  |
| 568.1202 | 1 | 245289.77 | C26H25BrFN6O3   | (M+H)+  |
| 569.1153 | 1 | 813532.44 | C26H25BrFN6O3   | (M+H)+  |
| 570.1183 | 1 | 246250.13 | C26H25BrFN6O3   | (M+H)+  |
| 571.1199 | 1 | 40486.55  | C26H25BrFN6O3   | (M+H)+  |
| 572.1206 | 1 | 4604.6    | C26H25BrFN6O3   | (M+H)+  |
| 573.1203 | 1 | 691.86    | C26H25BrFN6O3   | (M+H)+  |
| 589.0982 | 1 | 34994.23  | C26H24BrFN6NaO3 | (M+Na)+ |
| 590.1011 | 1 | 10235.79  | C26H24BrFN6NaO3 | (M+Na)+ |
| 591.0967 | 1 | 34880.57  | C26H24BrFN6NaO3 | (M+Na)+ |
| 592.099  | 1 | 10204.31  | C26H24BrFN6NaO3 | (M+Na)+ |
| 593.1005 | 1 | 1890.17   | C26H24BrFN6NaO3 | (M+Na)+ |
| 594.1004 | 1 | 400.86    | C26H24BrFN6NaO3 | (M+Na)+ |

--- End Of Report ---

<sup>1</sup>H-NMR spectrum of compound 10c

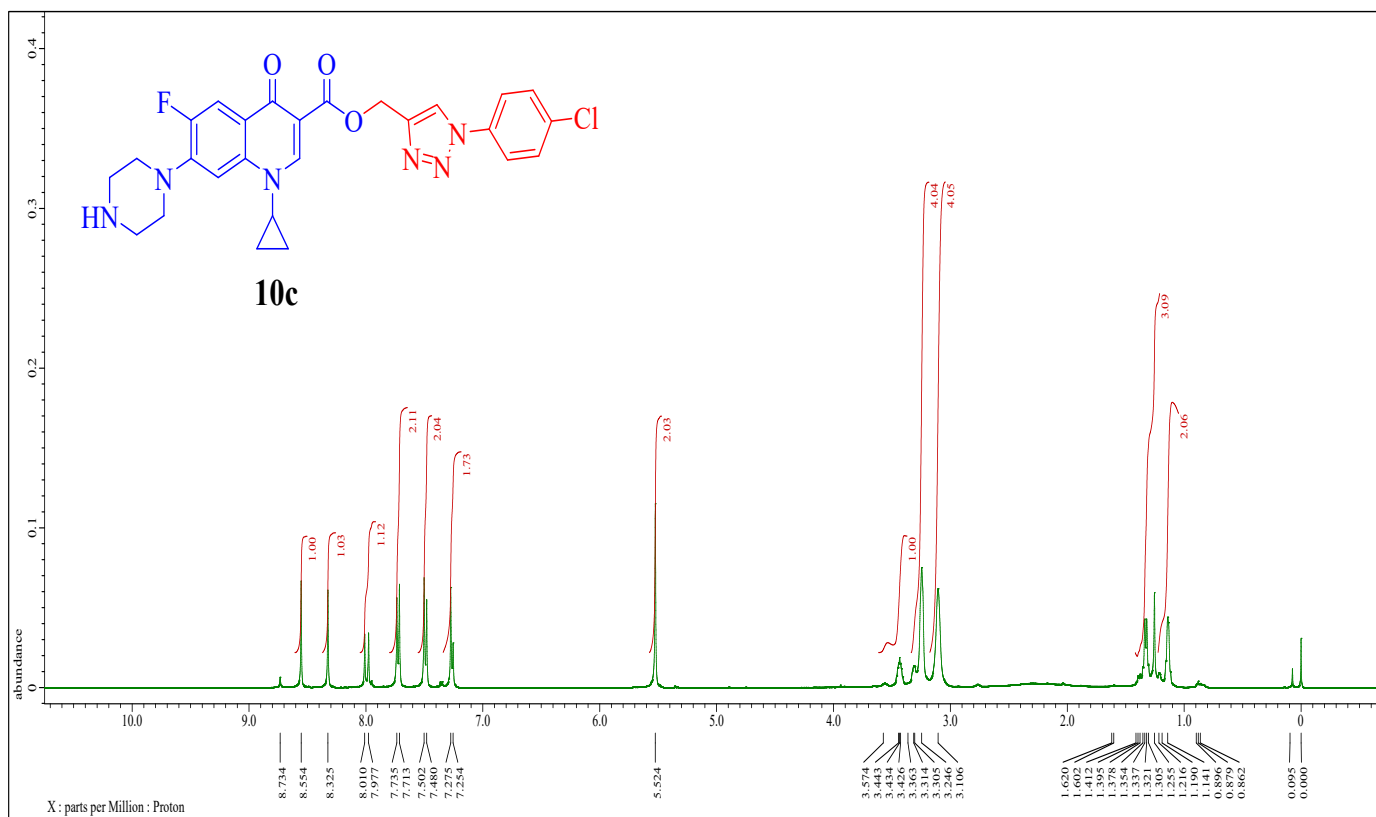

<sup>13</sup>C-NMR spectrum of compound **10c**

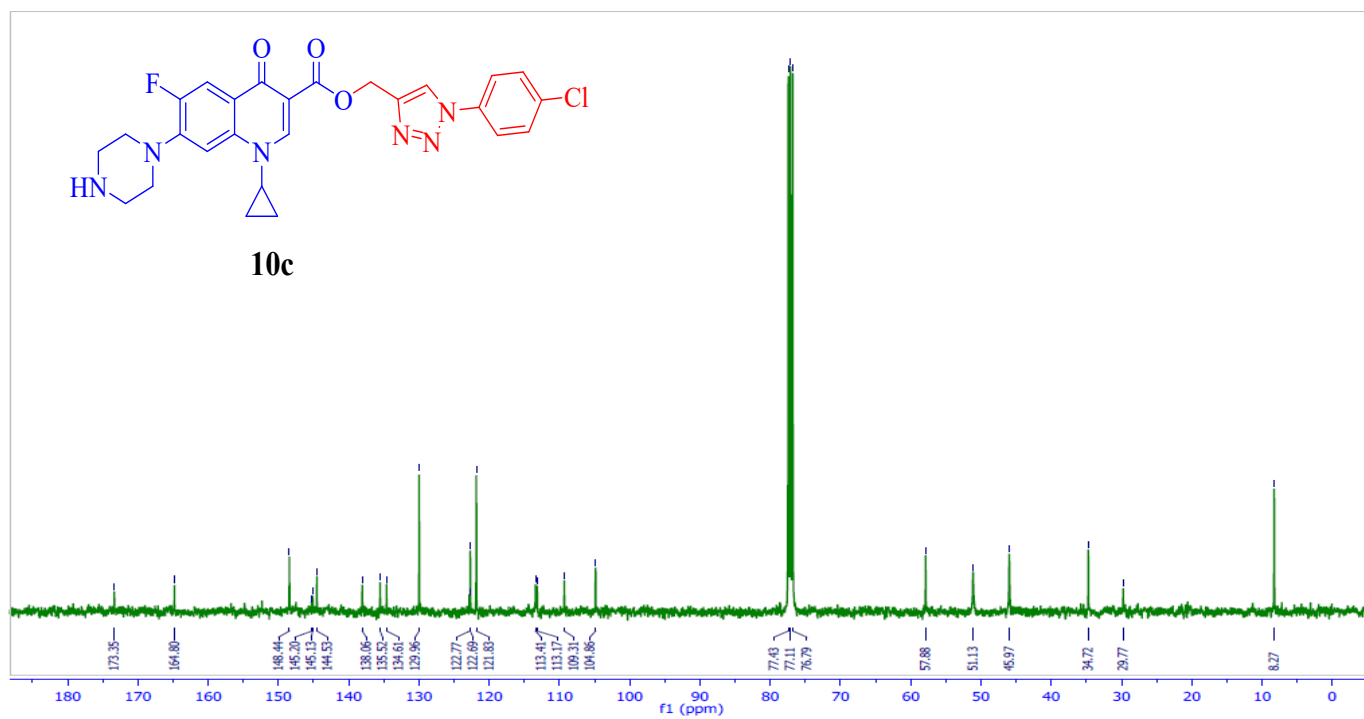

IR spectrum of compound **10c**

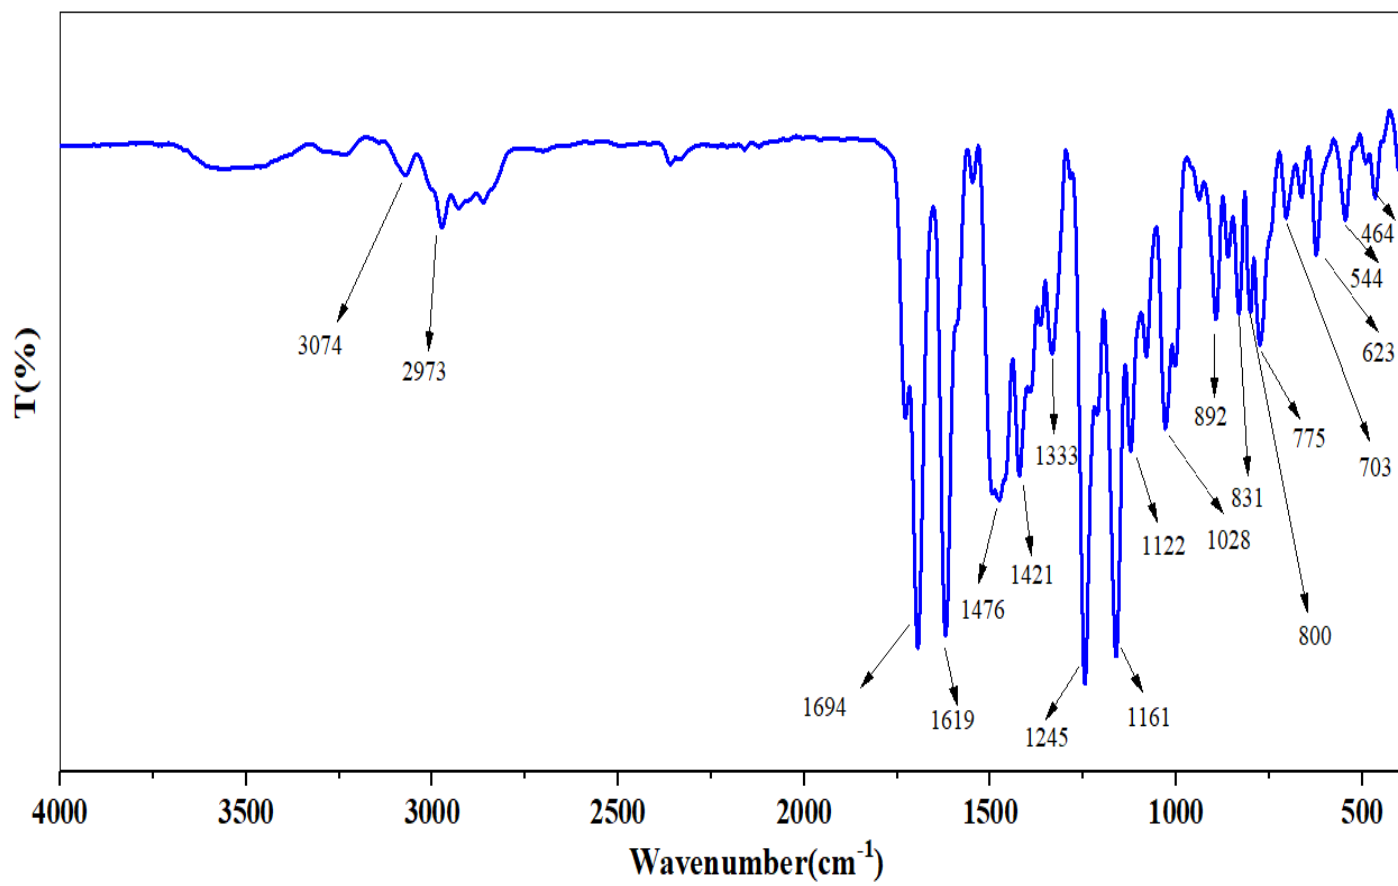

HRMS spectrum of compound **10c**

|                               |              |                      |                     |
|-------------------------------|--------------|----------------------|---------------------|
| <b>Data File</b>              | CPR-13.d     | <b>Sample Name</b>   | CPR-13              |
| <b>Sample Type</b>            | Sample       | <b>Position</b>      | P1-A5               |
| <b>Instrument Name</b>        | Instrument 1 | <b>User Name</b>     |                     |
| <b>Acq Method</b>             | MS Scan.m    | <b>Acquired Time</b> | 29-12-2022 12:46:40 |
| <b>IRM Calibration Status</b> | Success      | <b>DA Method</b>     | Default.m           |

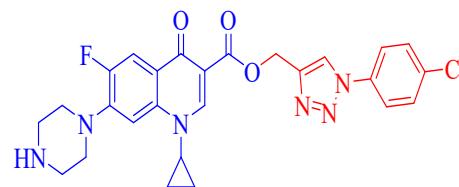

10c

|                               |                                                          |              |   |
|-------------------------------|----------------------------------------------------------|--------------|---|
| <b>Sample Group</b>           |                                                          | <b>Info.</b> | 3 |
| <b>Acquisition SW Version</b> | 6200 series<br>TOF/6500 series Q-<br>TOF B.05.01 (B5125) |              |   |

### Compound Table

| Compound Label            | RT    | Mass     | Abund | Formula            | Tgt Mass | Diff (ppm) | MFG Formula        | DB Formula         |
|---------------------------|-------|----------|-------|--------------------|----------|------------|--------------------|--------------------|
| Cpd 1: C26 H24 Cl F N6 O3 | 0.156 | 522.1611 | 43676 | C26 H24 Cl F N6 O3 | 522.1582 | 5.51       | C26 H24 Cl F N6 O3 | C26 H24 Cl F N6 O3 |

| Compound Label            | m/z      | RT    | Algorithm       | Mass     |
|---------------------------|----------|-------|-----------------|----------|
| Cpd 1: C26 H24 Cl F N6 O3 | 545.1495 | 0.156 | Find By Formula | 522.1611 |

### MS Zoomed Spectrum

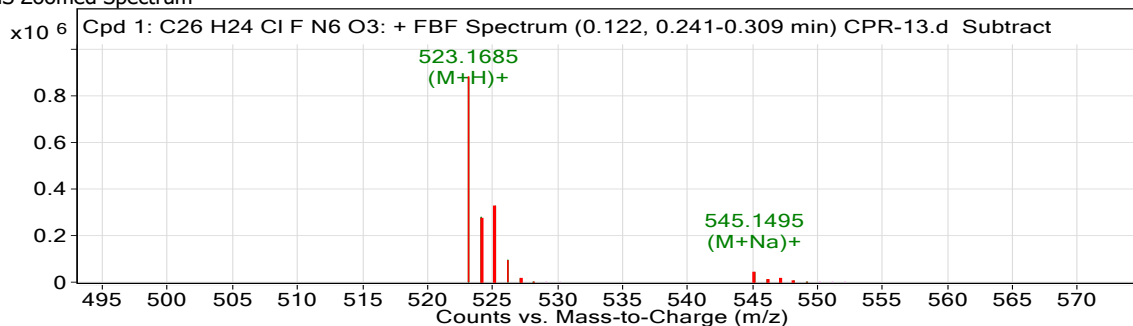

### MS Spectrum Peak List

| m/z      | z | Abund     | Formula         | Ion     |
|----------|---|-----------|-----------------|---------|
| 523.1685 | 1 | 879885.56 | C26H25ClFN6O3   | (M+H)+  |
| 524.1714 | 1 | 277010.97 | C26H25ClFN6O3   | (M+H)+  |
| 525.1668 | 1 | 327758.5  | C26H25ClFN6O3   | (M+H)+  |
| 526.1684 | 1 | 93453.57  | C26H25ClFN6O3   | (M+H)+  |
| 527.1701 | 1 | 15023.49  | C26H25ClFN6O3   | (M+H)+  |
| 528.1713 | 1 | 1774.71   | C26H25ClFN6O3   | (M+H)+  |
| 545.1495 | 1 | 43676.43  | C26H24ClFN6NaO3 | (M+Na)+ |
| 546.1528 | 1 | 12872.21  | C26H24ClFN6NaO3 | (M+Na)+ |
| 547.1478 | 1 | 15333.61  | C26H24ClFN6NaO3 | (M+Na)+ |
| 548.1499 | 1 | 4110.7    | C26H24ClFN6NaO3 | (M+Na)+ |
| 549.1527 | 1 | 854.57    | C26H24ClFN6NaO3 | (M+Na)+ |

--- End Of Report ---

### <sup>1</sup>H-NMR spectrum of compound 10d

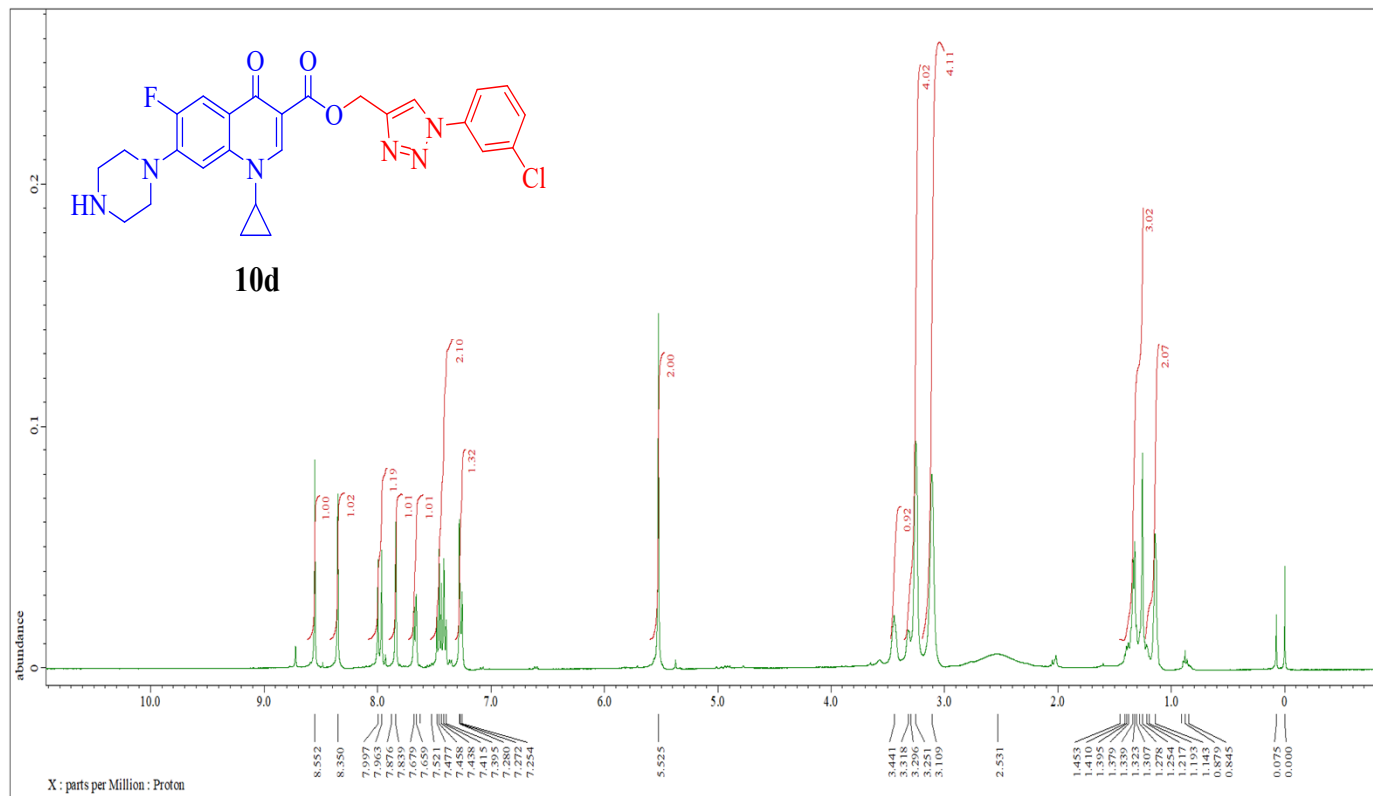

### <sup>13</sup>C-NMR spectrum of compound 10d

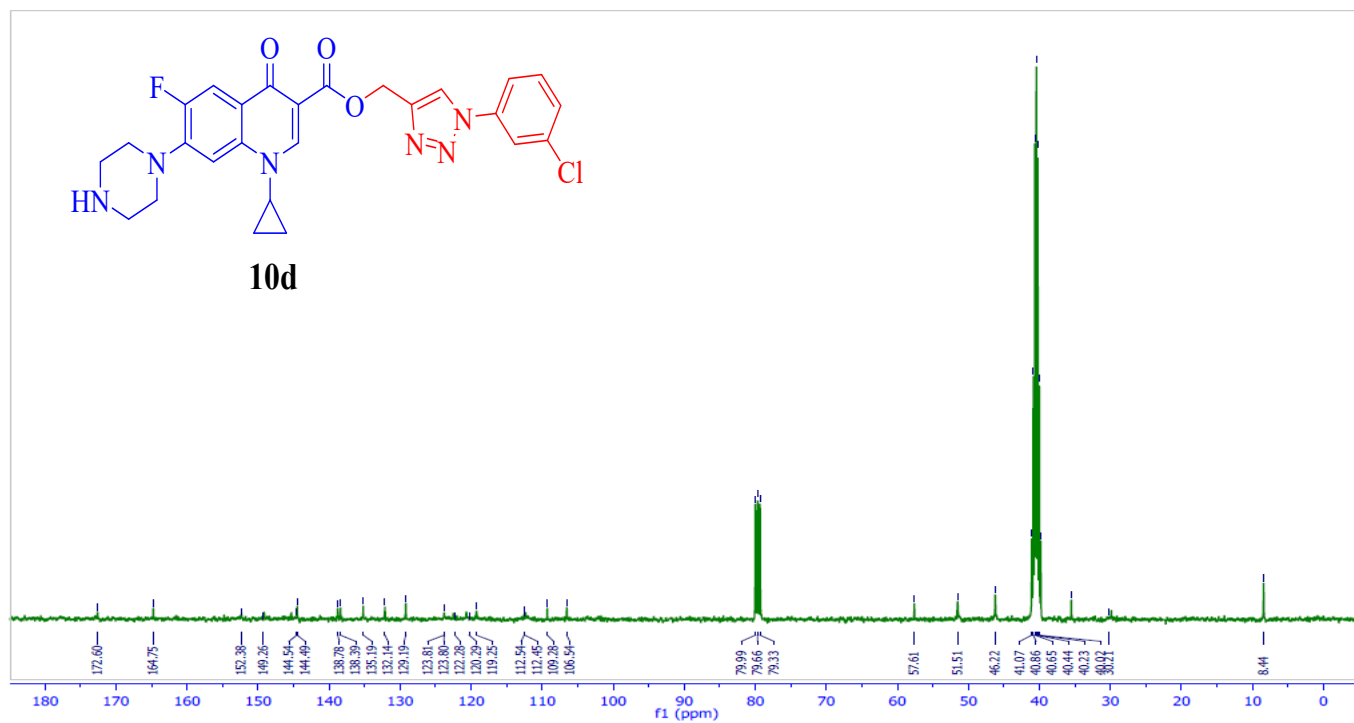

# HRMS spectrum of compound 10d

|                               |              |                      |                        |
|-------------------------------|--------------|----------------------|------------------------|
| <b>Data File</b>              | CPR-14.d     | <b>Sample Name</b>   | CPR-14                 |
| <b>Sample Type</b>            | Sample       | <b>Position</b>      | P1-A6                  |
| <b>Instrument Name</b>        | Instrument 1 | <b>User Name</b>     |                        |
| <b>Acq Method</b>             | MS Scan.m    | <b>Acquired Time</b> | 29-12-2022<br>12:51:25 |
| <b>IRM Calibration Status</b> | Success      | <b>DA Method</b>     | Default.m              |
| <b>Comment</b>                |              |                      |                        |

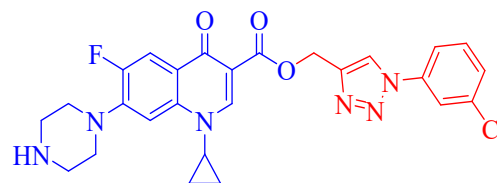

**10d**

|                               |                                                   |              |   |
|-------------------------------|---------------------------------------------------|--------------|---|
| <b>Sample Group</b>           |                                                   | <b>Info.</b> | 3 |
| <b>Acquisition SW Version</b> | 6200 series TOF/6500 series Q-TOF B.05.01 (B5125) |              |   |

## Compound Table

| Compound Label            | RT    | Mass     | Abund | Formula            | Tgt Mass | Diff (ppm) | MFG Formula       | DB Formula         |
|---------------------------|-------|----------|-------|--------------------|----------|------------|-------------------|--------------------|
| Cpd 1: C26 H24 Cl F N6 O3 | 0.186 | 522.1606 | 45346 | C26 H24 Cl F N6 O3 | 522.1582 | 4.53       | C26 H24 Cl F N6O3 | C26 H24 Cl F N6 O3 |

| Compound Label            | m/z     | RT    | Algorithm       | Mass     |
|---------------------------|---------|-------|-----------------|----------|
| Cpd 1: C26 H24 Cl F N6 O3 | 545.149 | 0.186 | Find By Formula | 522.1606 |

## MS Zoomed Spectrum

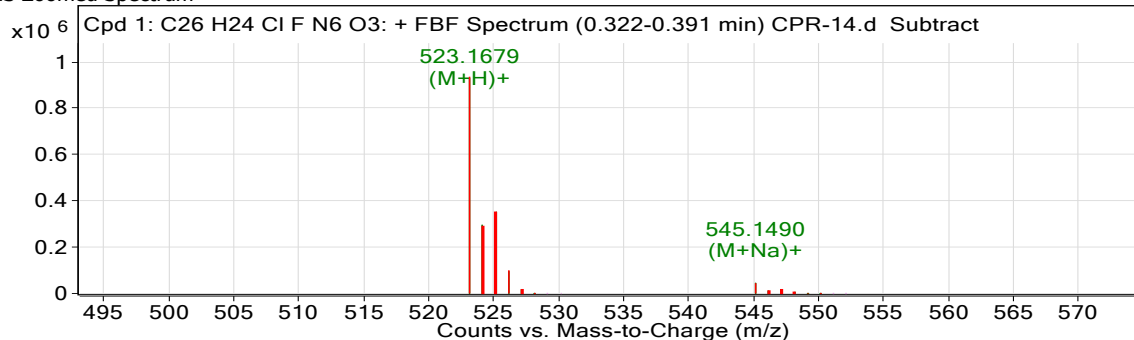

## MS Spectrum Peak List

| m/z      | z | Abund     | Formula         | Ion     |
|----------|---|-----------|-----------------|---------|
| 523.1679 | 1 | 931869.81 | C26H25ClFN6O3   | (M+H)+  |
| 524.1709 | 1 | 293209.81 | C26H25ClFN6O3   | (M+H)+  |
| 525.1664 | 1 | 349703.53 | C26H25ClFN6O3   | (M+H)+  |
| 526.1679 | 1 | 97192.2   | C26H25ClFN6O3   | (M+H)+  |
| 527.1695 | 1 | 15739     | C26H25ClFN6O3   | (M+H)+  |
| 528.1701 | 1 | 1794.84   | C26H25ClFN6O3   | (M+H)+  |
| 545.149  | 1 | 45345.54  | C26H24ClFN6NaO3 | (M+Na)+ |
| 546.1521 | 1 | 13486.66  | C26H24ClFN6NaO3 | (M+Na)+ |
| 547.1471 | 1 | 16223.66  | C26H24ClFN6NaO3 | (M+Na)+ |
| 548.149  | 1 | 4453.62   | C26H24ClFN6NaO3 | (M+Na)+ |
| 549.1542 | 1 | 877.39    | C26H24ClFN6NaO3 | (M+Na)+ |
| 550.152  | 1 | 233.16    | C26H24ClFN6NaO3 | (M+Na)+ |

--- End Of Report ---

<sup>1</sup>H-NMR spectrum of compound **10e**

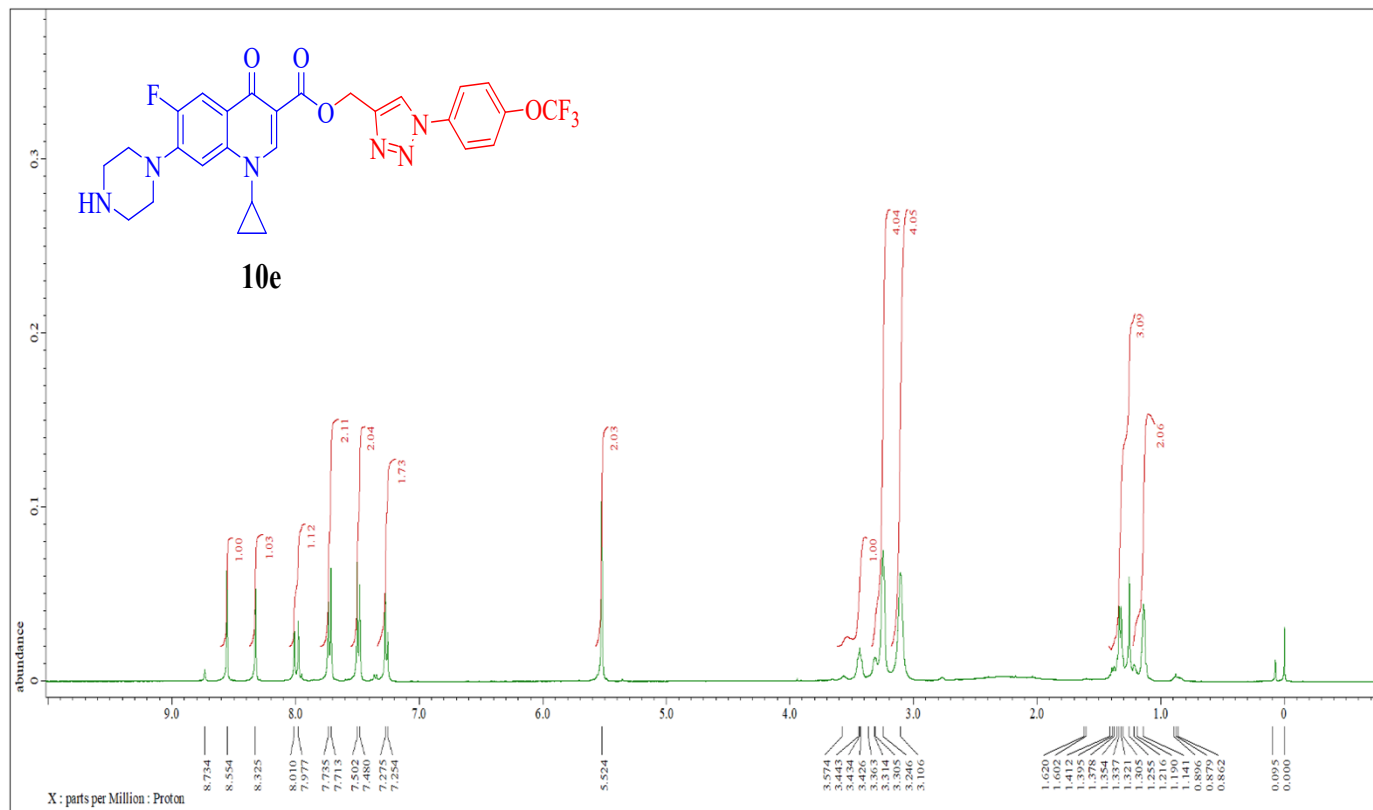

<sup>13</sup>C-NMR spectrum of compound **10e**



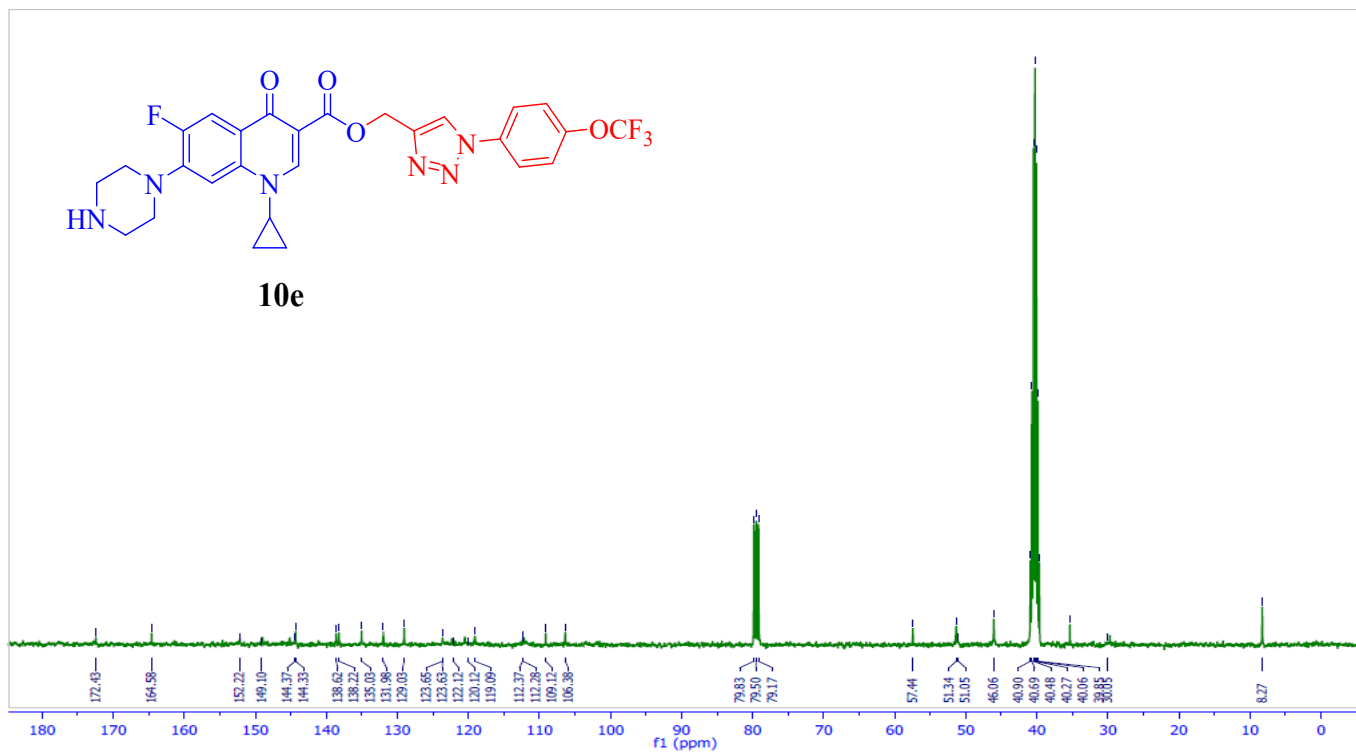

$^{19}\text{F}$ -NMR spectrum of compound **10e**

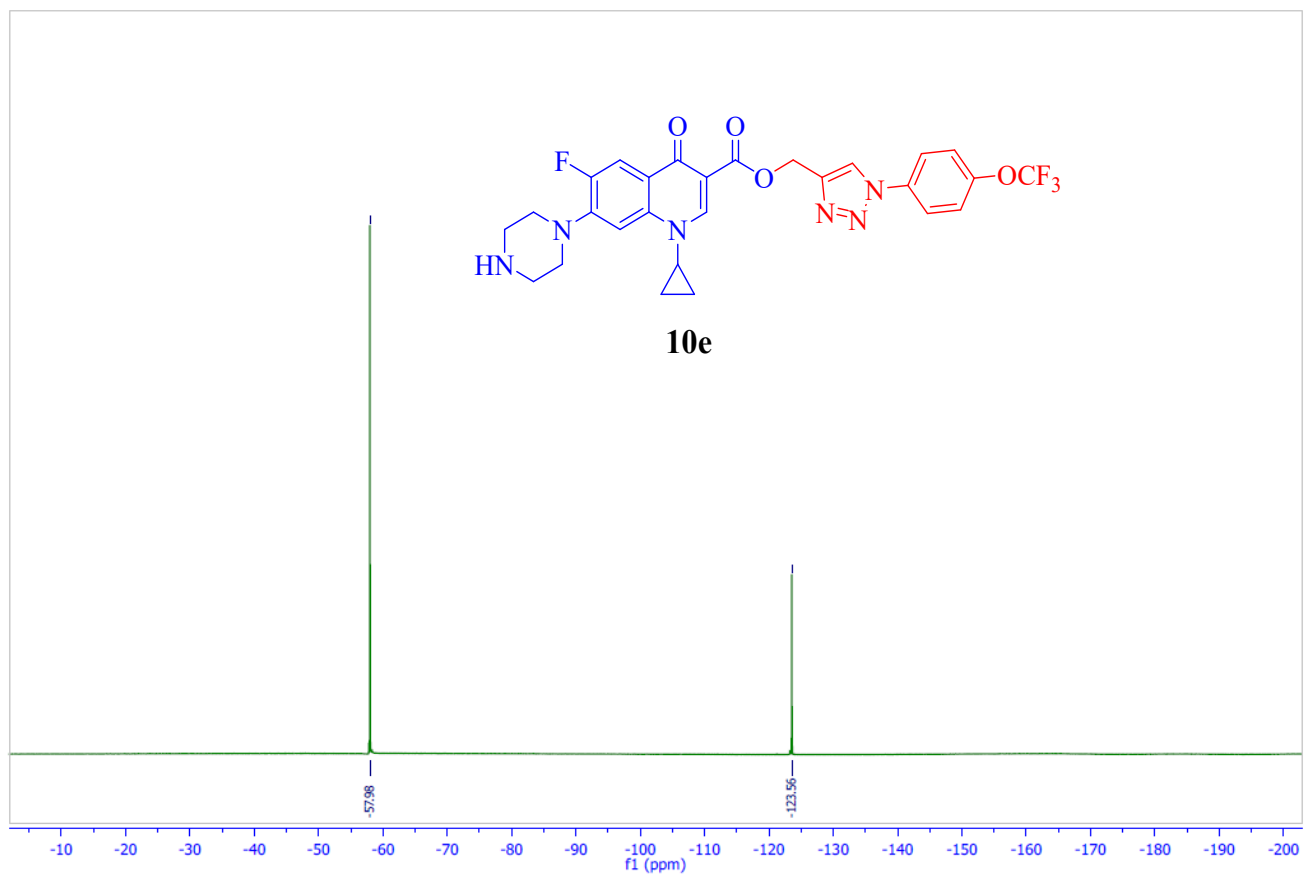

HRMS spectrum of compound **10e**

**Data File** CPR-15.d **Sample Name** CPR-15  
**Sample Type** Sample **Position** P1-C1  
**Instrument Name** Instrument 1 **User Name**  
**Acq Method** MS Scan.m **Acquired Time** 24-05-2023  
**IRM Calibration Status** Success **DA Method** Default.m  
**Comment**

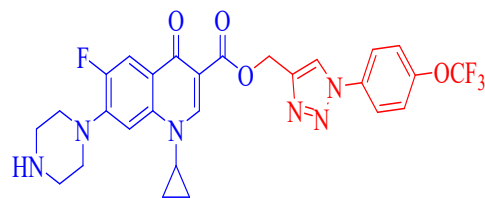

10e

**Sample Group** Info. 3  
**Acquisition SW Version** 6200 series TOF/6500  
 series Q-TOF B.05.01  
 (B5125)

### Compound Table

| Compound Label          | RT    | Mass     | Abund  | Formula          | Tgt Mass | Diff (ppm) | MFG Formula      | DB Formula       |
|-------------------------|-------|----------|--------|------------------|----------|------------|------------------|------------------|
| Cpd 1: C27 H24 F4 N6 O4 | 0.121 | 572.1774 | 110998 | C27 H24 F4 N6 O4 | 572.1795 | -3.69      | C27 H24 F4 N6 O4 | C27 H24 F4 N6 O4 |

| Compound Label          | m/z      | RT    | Algorithm       | Mass     |
|-------------------------|----------|-------|-----------------|----------|
| Cpd 1: C27 H24 F4 N6 O4 | 573.1847 | 0.121 | Find By Formula | 572.1774 |

### MS Zoomed Spectrum

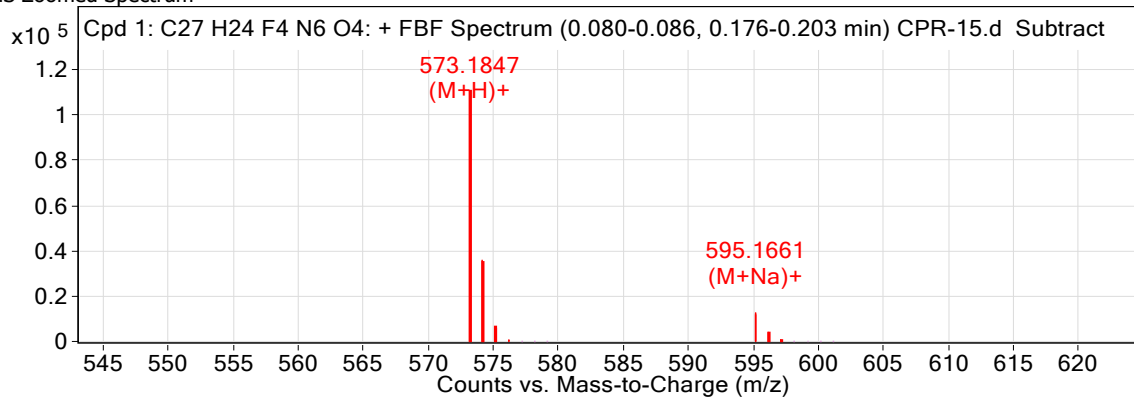

### MS Spectrum Peak List

| m/z      | z | Abund     | Formula        | Ion     |
|----------|---|-----------|----------------|---------|
| 573.1847 | 1 | 110997.91 | C27H25F4N6O4   | (M+H)+  |
| 574.188  | 1 | 35606.68  | C27H25F4N6O4   | (M+H)+  |
| 575.1893 | 1 | 6232.95   | C27H25F4N6O4   | (M+H)+  |
| 576.191  | 1 | 822.14    | C27H25F4N6O4   | (M+H)+  |
| 595.1661 | 1 | 12344.87  | C27H24F4N6NaO4 | (M+Na)+ |
| 596.1689 | 1 | 3768.71   | C27H24F4N6NaO4 | (M+Na)+ |
| 597.171  | 1 | 697.37    | C27H24F4N6NaO4 | (M+Na)+ |

--- End Of Report ---

<sup>1</sup>H-NMR spectrum of compound 10f

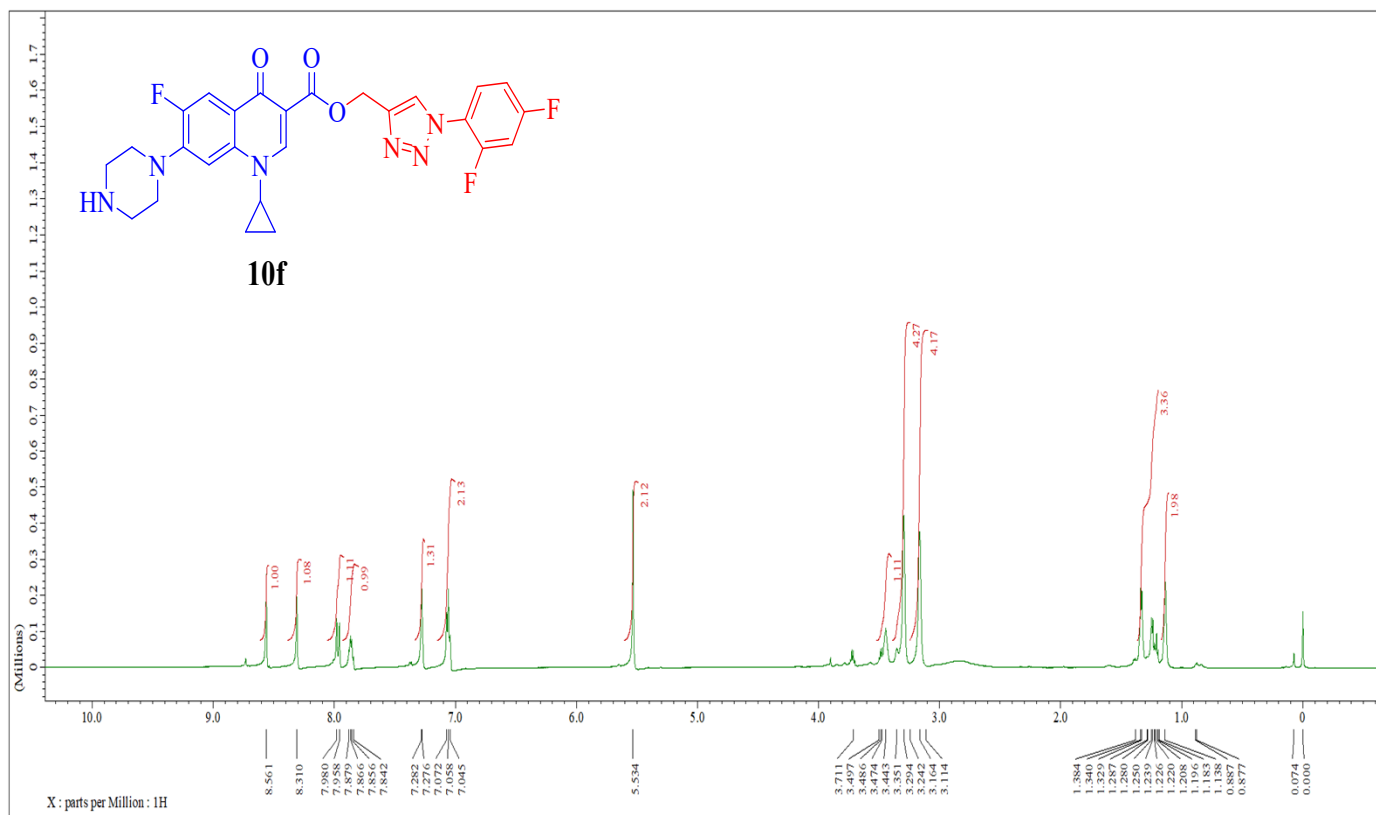

<sup>13</sup>C-NMR spectrum of compound **10f**

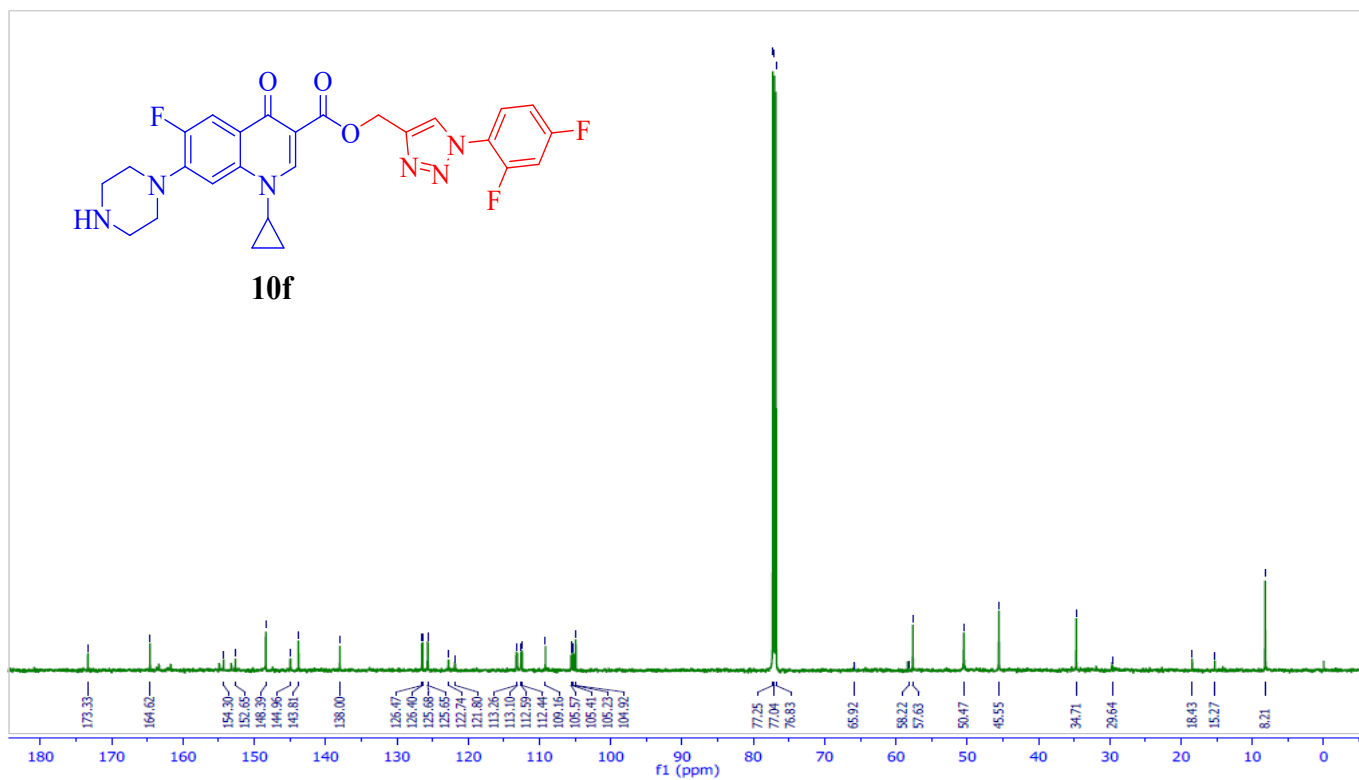

<sup>19</sup>F-NMR spectrum of compound **10f**

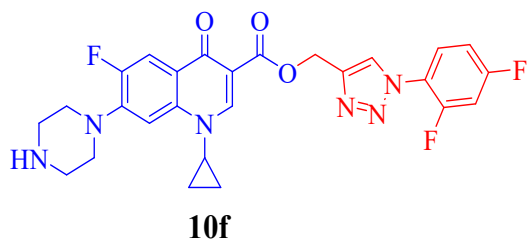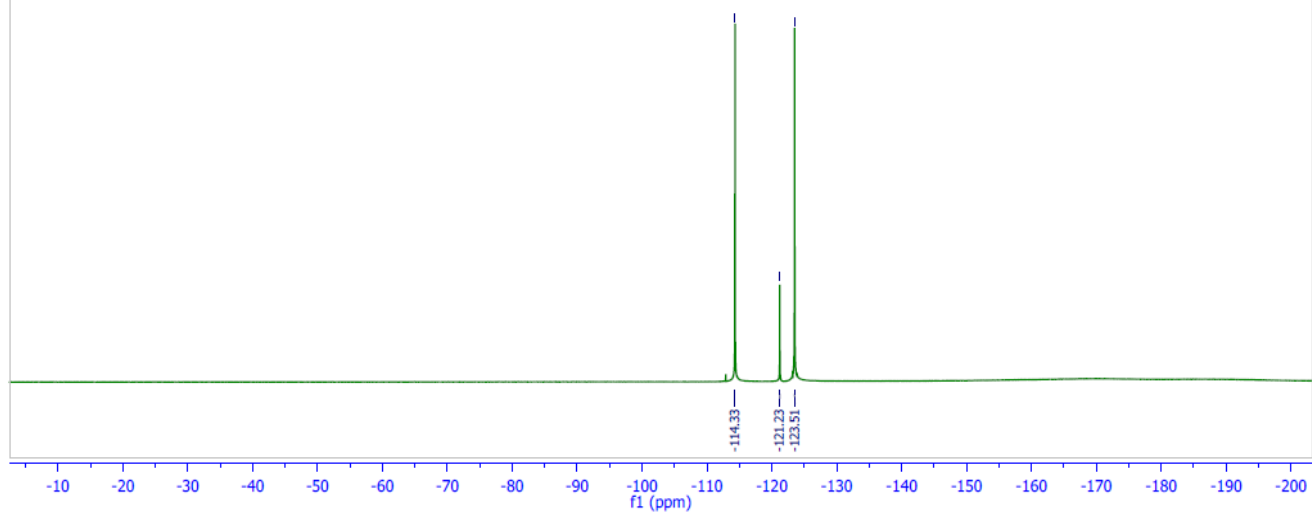

HRMS spectrum of compound **10f**

Data File

CPR-16.d

Sample Name

CPR-16

45

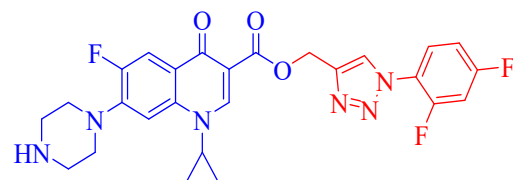

|                               |              |                      |                        |
|-------------------------------|--------------|----------------------|------------------------|
| <b>Sample Type</b>            | Sample       | <b>Position</b>      | P1-C2                  |
| <b>Instrument Name</b>        | Instrument 1 | <b>User Name</b>     |                        |
| <b>Acq Method</b>             | MS Scan.m    | <b>Acquired Time</b> | 24-05-2023<br>13:48:21 |
| <b>IRM Calibration Status</b> | Success      | <b>DA Method</b>     | Default.m              |
| <b>Comment</b>                |              |                      |                        |

|                               |                                                   |              |   |
|-------------------------------|---------------------------------------------------|--------------|---|
| <b>Sample Group</b>           |                                                   | <b>Info.</b> | 3 |
| <b>Acquisition SW Version</b> | 6200 series TOF/6500 series Q-TOF B.05.01 (B5125) |              |   |

### Compound Table

| Compound Label          | RT    | Mass     | Abund  | Formula          | Tgt Mass | Diff (ppm) | MFG Formula      | DB Formula       |
|-------------------------|-------|----------|--------|------------------|----------|------------|------------------|------------------|
| Cpd 1: C26 H23 F3 N6 O3 | 0.121 | 524.1766 | 104279 | C26 H23 F3 N6 O3 | 524.1784 | -3.47      | C26 H23 F3 N6 O3 | C26 H23 F3 N6 O3 |

| Compound Label          | m/z      | RT    | Algorithm       | Mass     |
|-------------------------|----------|-------|-----------------|----------|
| Cpd 1: C26 H23 F3 N6 O3 | 525.1839 | 0.121 | Find By Formula | 524.1766 |

### MS Zoomed Spectrum

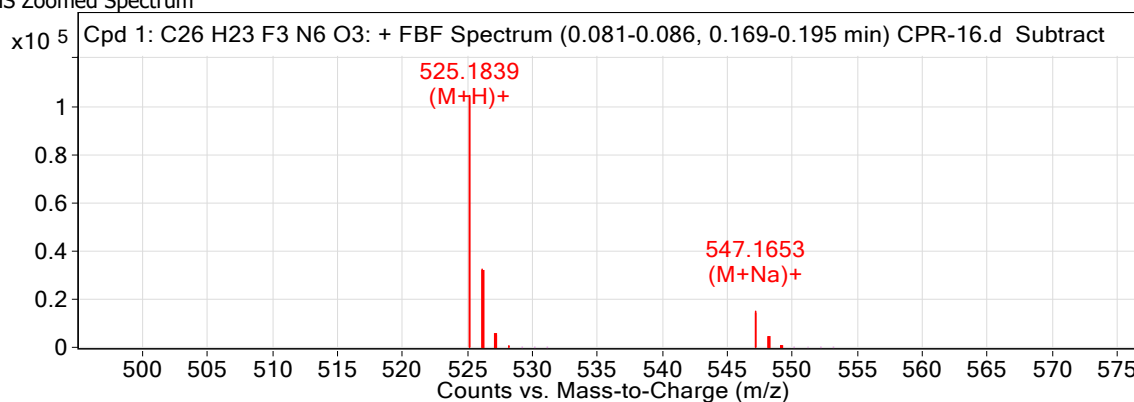

### MS Spectrum Peak List

| m/z      | z | Abund     | Formula        | Ion     |
|----------|---|-----------|----------------|---------|
| 525.1839 | 1 | 104279.28 | C26H24F3N6O3   | (M+H)+  |
| 526.1869 | 1 | 32463.12  | C26H24F3N6O3   | (M+H)+  |
| 527.1889 | 1 | 5167.76   | C26H24F3N6O3   | (M+H)+  |
| 528.1914 | 1 | 635.47    | C26H24F3N6O3   | (M+H)+  |
| 547.1653 | 1 | 14701.31  | C26H23F3N6NaO3 | (M+Na)+ |
| 548.1682 | 1 | 4322.45   | C26H23F3N6NaO3 | (M+Na)+ |
| 549.171  | 1 | 650.53    | C26H23F3N6NaO3 | (M+Na)+ |

--- End Of Report ---

<sup>1</sup>H-NMR spectrum of compound **11a**

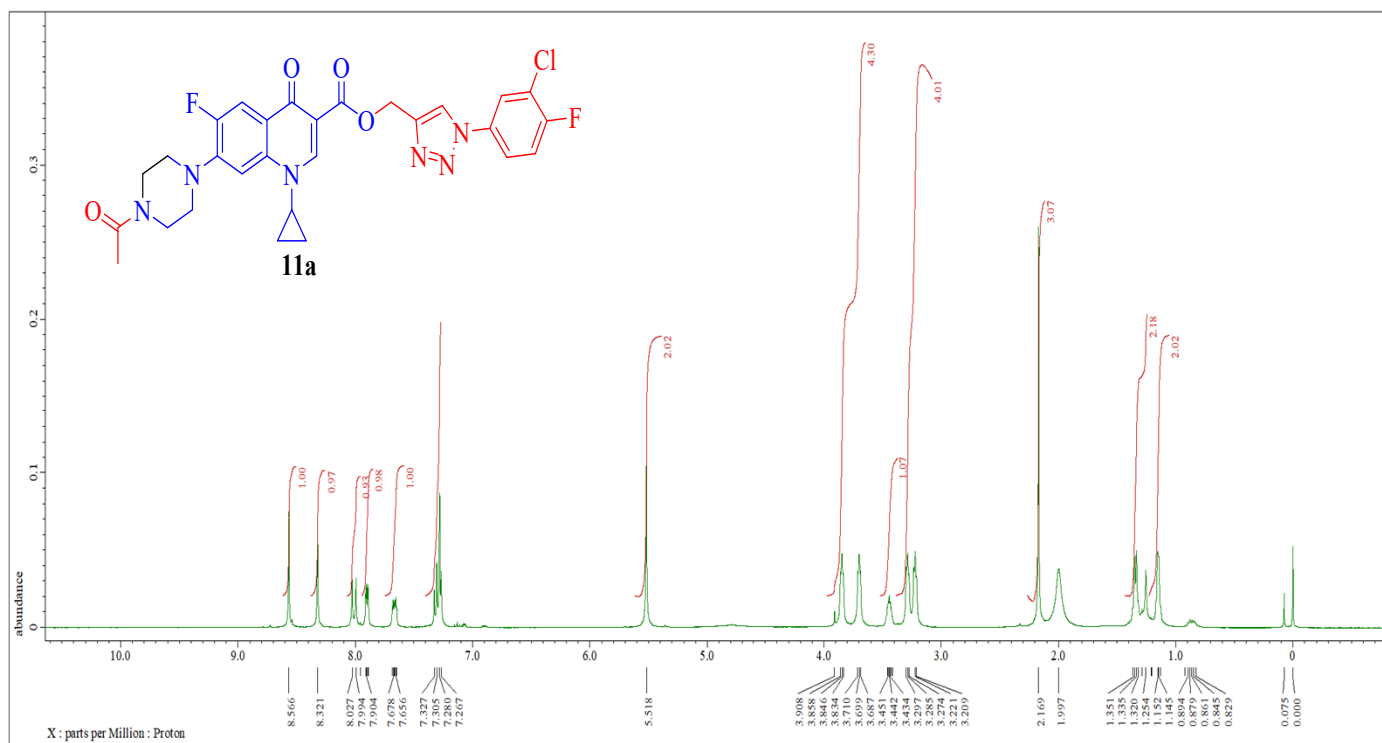

<sup>13</sup>C-NMR spectrum of compound 11a

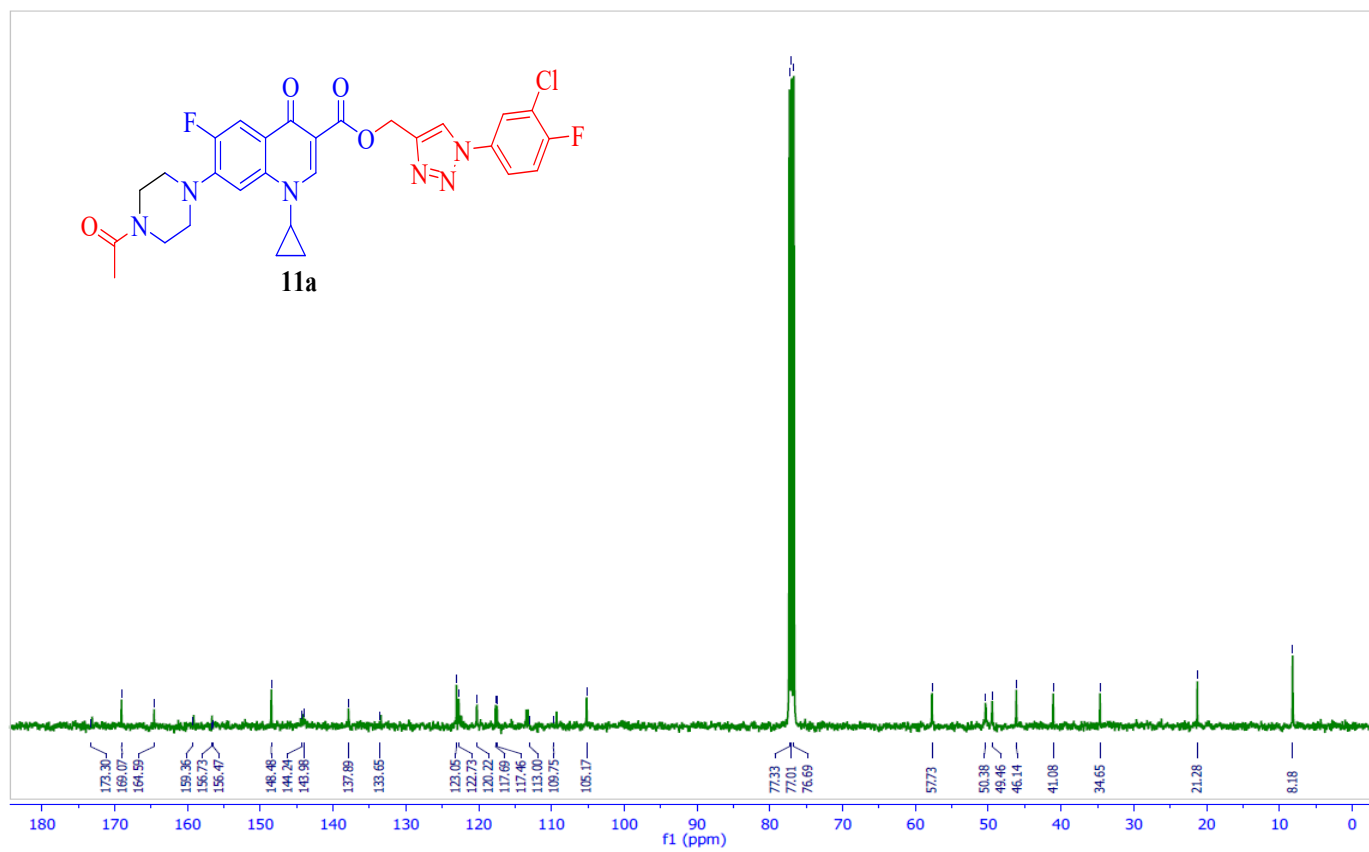

<sup>19</sup>F-NMR spectrum of compound 11a

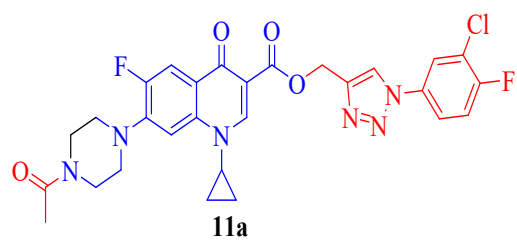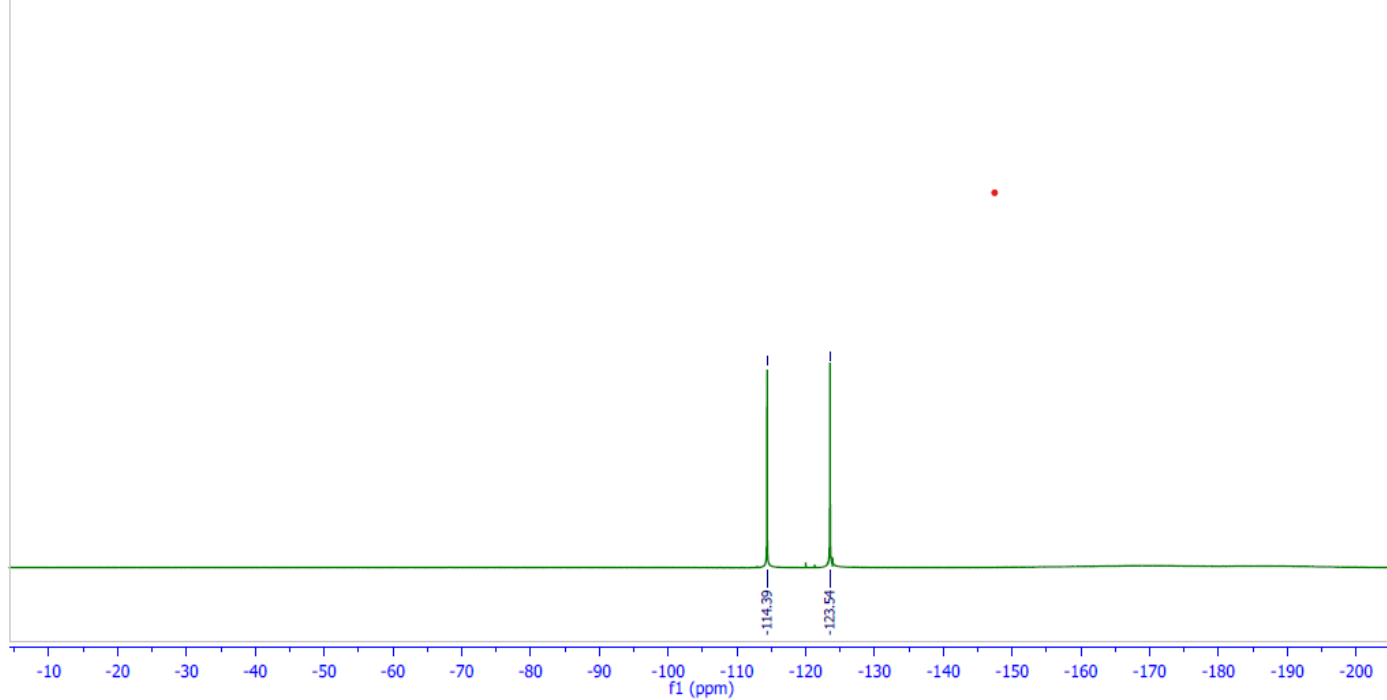

HRMS spectrum of compound **11a**



**Data File** CPR-19.d      **Sample Name** CPR-19  
**Sample Type** Sample      **Position** P1-C4  
**Instrument Name** Instrument 1      **User Name**  
**Acq Method** MS Scan.m      **Acquired Time** 24-05-2023  
**IRM Calibration Status** Success      **DA Method** Default.m  
**Comment**

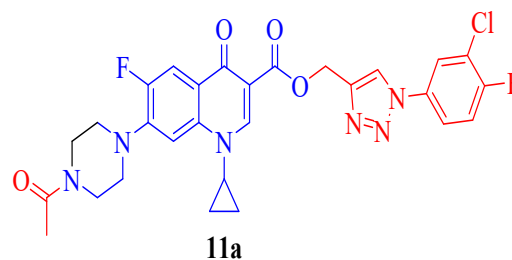

**Sample Group**  
**Acquisition SW Version** 6200 series TOF/6500 series Q-TOF B.05.01 (B5125)      **Info.** 3

### Compound Table

| Compound Label             | RT    | Mass     | Abund  | Formula             | Tgt Mass | Diff (ppm) | MFG Formula         | DB Formula          |
|----------------------------|-------|----------|--------|---------------------|----------|------------|---------------------|---------------------|
| Cpd 1: C28 H25 Cl F2 N6 O4 | 0.103 | 582.1577 | 128259 | C28 H25 Cl F2 N6 O4 | 582.1594 | -2.83      | C28 H25 Cl F2 N6 O4 | C28 H25 Cl F2 N6 O4 |

| Compound Label             | m/z      | RT    | Algorithm       | Mass     |
|----------------------------|----------|-------|-----------------|----------|
| Cpd 1: C28 H25 Cl F2 N6 O4 | 583.1649 | 0.103 | Find By Formula | 582.1577 |

### MS Zoomed Spectrum

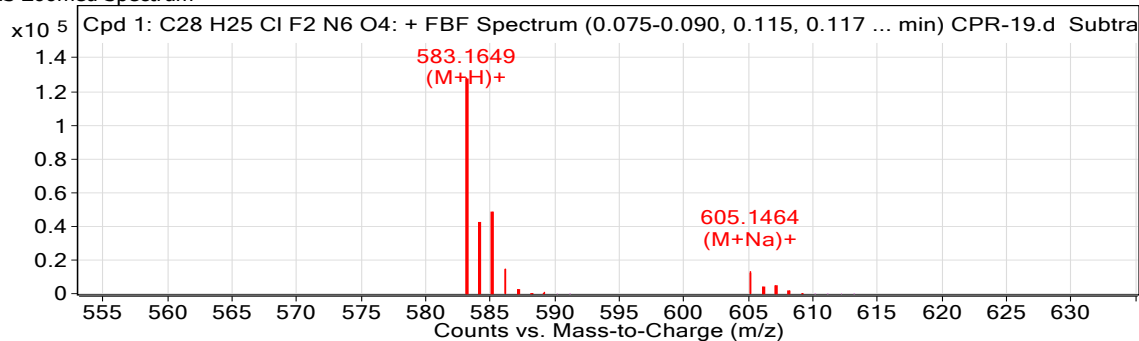

### MS Spectrum Peak List

| m/z      | z | Abund     | Formula          | Ion     |
|----------|---|-----------|------------------|---------|
| 583.1649 | 1 | 128258.55 | C28H26ClF2N6O4   | (M+H)+  |
| 584.1684 | 1 | 41568.09  | C28H26ClF2N6O4   | (M+H)+  |
| 585.1638 | 1 | 47992.46  | C28H26ClF2N6O4   | (M+H)+  |
| 586.1653 | 1 | 14645.07  | C28H26ClF2N6O4   | (M+H)+  |
| 587.1673 | 1 | 2512.5    | C28H26ClF2N6O4   | (M+H)+  |
| 588.1706 | 1 | 294.41    | C28H26ClF2N6O4   | (M+H)+  |
| 589.1749 | 1 | 555.02    | C28H26ClF2N6O4   | (M+H)+  |
| 605.1464 | 1 | 12927.59  | C28H25ClF2N6NaO4 | (M+Na)+ |
| 606.1493 | 1 | 3954.72   | C28H25ClF2N6NaO4 | (M+Na)+ |
| 607.1449 | 1 | 4460.4    | C28H25ClF2N6NaO4 | (M+Na)+ |
| 608.1471 | 1 | 1258.04   | C28H25ClF2N6NaO4 | (M+Na)+ |
| 609.1494 | 1 | 189.78    | C28H25ClF2N6NaO4 | (M+Na)+ |

--- End Of Report ---

<sup>1</sup>H-NMR spectrum of compound **11b**

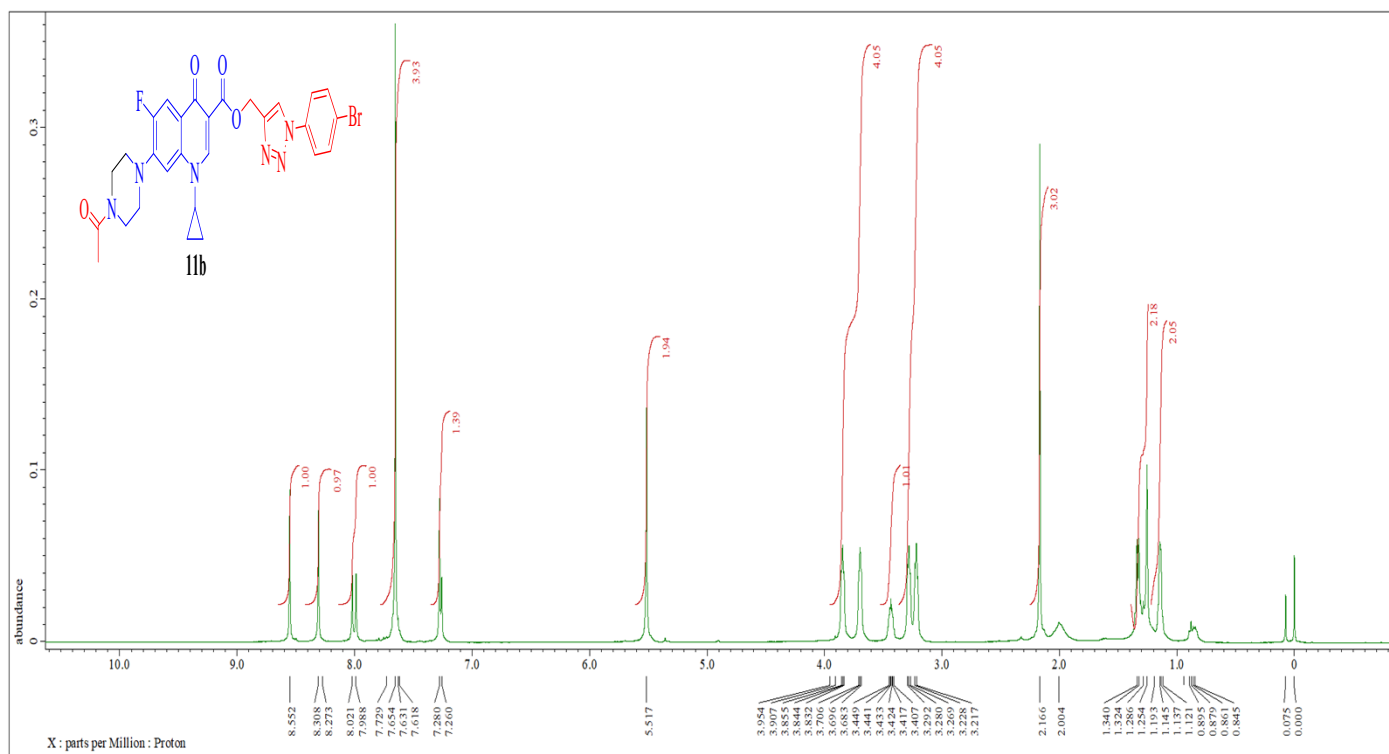

<sup>13</sup>C-NMR spectrum of compound **11b**

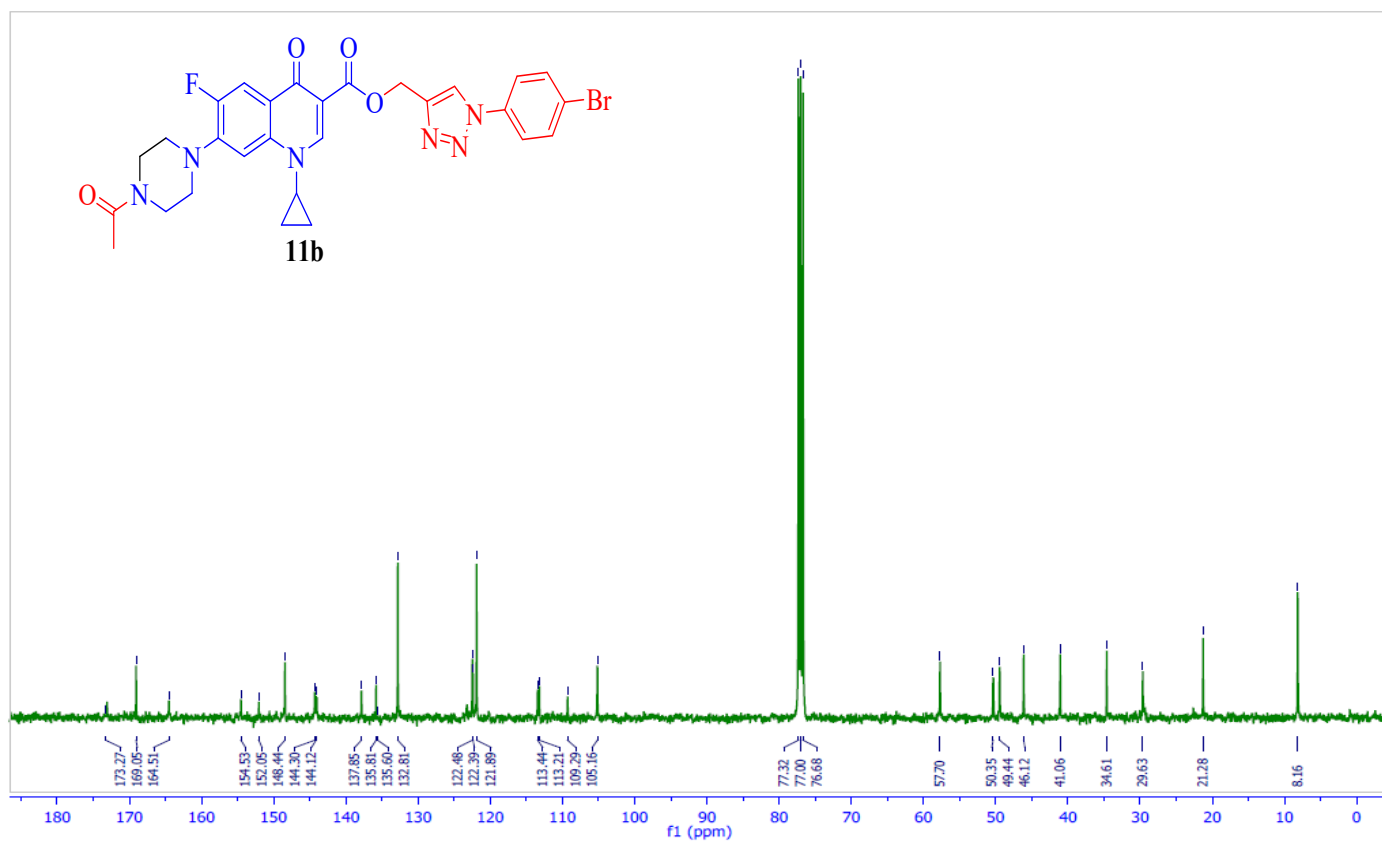

HRMS spectrum of compound **11b**

|                               |              |                      |                        |
|-------------------------------|--------------|----------------------|------------------------|
| <b>Data File</b>              | CPR-20.d     | <b>Sample Name</b>   | CPR-20                 |
| <b>Sample Type</b>            | Sample       | <b>Position</b>      | P1-E2                  |
| <b>Instrument Name</b>        | Instrument 1 | <b>User Name</b>     |                        |
| <b>Acq Method</b>             | MS Scan.m    | <b>Acquired Time</b> | 01-06-2023<br>15:52:21 |
| <b>IRM Calibration Status</b> | Success      | <b>DA Method</b>     | Default.m              |
| <b>Comment</b>                |              |                      |                        |

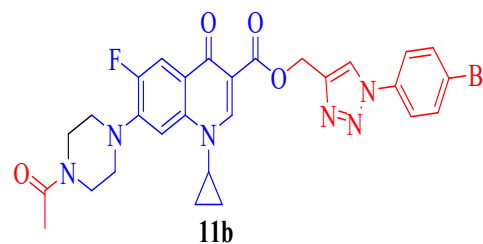

|                               |                                                         |              |   |
|-------------------------------|---------------------------------------------------------|--------------|---|
| <b>Sample Group</b>           |                                                         | <b>Info.</b> | 3 |
| <b>Acquisition SW Version</b> | 6200 series TOF/6500<br>series Q-TOF B.05.01<br>(B5125) |              |   |

### Compound Table

| Compound Label            | RT    | Mass     | Abund | Formula            | Tgt Mass | Diff (ppm) | MFG Formula        | DB Formula         |
|---------------------------|-------|----------|-------|--------------------|----------|------------|--------------------|--------------------|
| Cpd 1: C28 H26 Br F N6 O4 | 0.092 | 608.1202 | 5076  | C28 H26 Br F N6 O4 | 608.1183 | 3.14       | C28 H26 Br F N6 O4 | C28 H26 Br F N6 O4 |

| Compound Label            | m/z      | RT    | Algorithm       | Mass     |
|---------------------------|----------|-------|-----------------|----------|
| Cpd 1: C28 H26 Br F N6 O4 | 633.1071 | 0.092 | Find By Formula | 608.1202 |

### MS Zoomed Spectrum

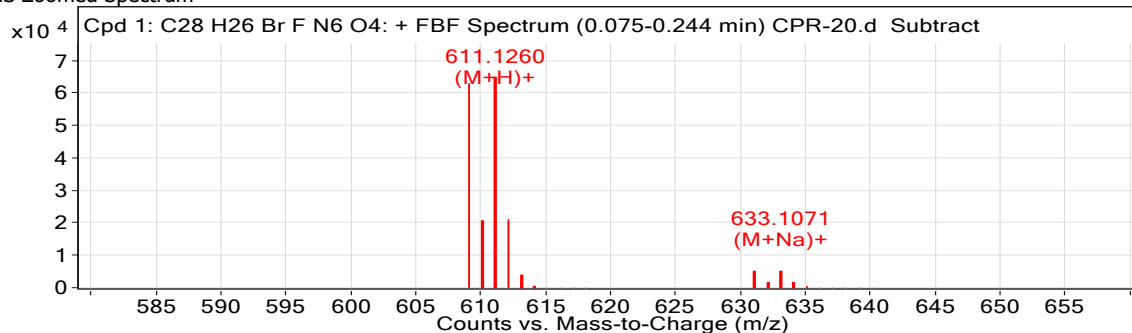

### MS Spectrum Peak List

| m/z      | z | Abund    | Formula         | Ion     |
|----------|---|----------|-----------------|---------|
| 609.1274 | 1 | 63080.1  | C28H27BrFN6O4   | (M+H)+  |
| 610.1307 | 1 | 20531.09 | C28H27BrFN6O4   | (M+H)+  |
| 611.126  | 1 | 64951.37 | C28H27BrFN6O4   | (M+H)+  |
| 612.1287 | 1 | 20913.86 | C28H27BrFN6O4   | (M+H)+  |
| 613.131  | 1 | 3481.33  | C28H27BrFN6O4   | (M+H)+  |
| 614.1345 | 1 | 424.58   | C28H27BrFN6O4   | (M+H)+  |
| 631.1086 | 1 | 5025.58  | C28H26BrFN6NaO4 | (M+Na)+ |
| 632.1115 | 1 | 1522.32  | C28H26BrFN6NaO4 | (M+Na)+ |
| 633.1071 | 1 | 5076.27  | C28H26BrFN6NaO4 | (M+Na)+ |
| 634.1093 | 1 | 1514.47  | C28H26BrFN6NaO4 | (M+Na)+ |
| 635.1118 | 1 | 230.87   | C28H26BrFN6NaO4 | (M+Na)+ |

--- End Of Report ---

<sup>1</sup>H-NMR spectrum of compound **11c**

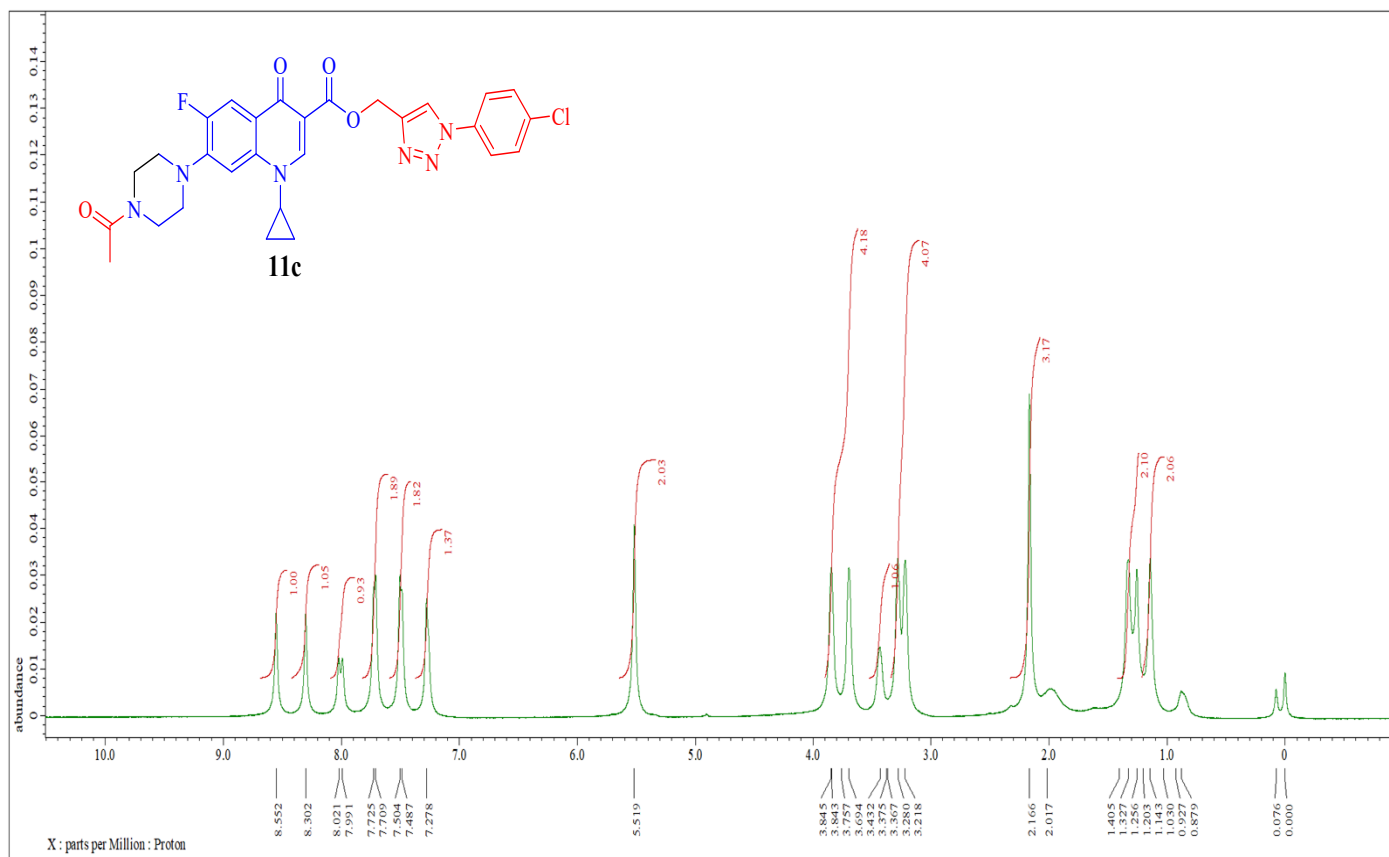

<sup>13</sup>C-NMR spectrum of compound **11c**

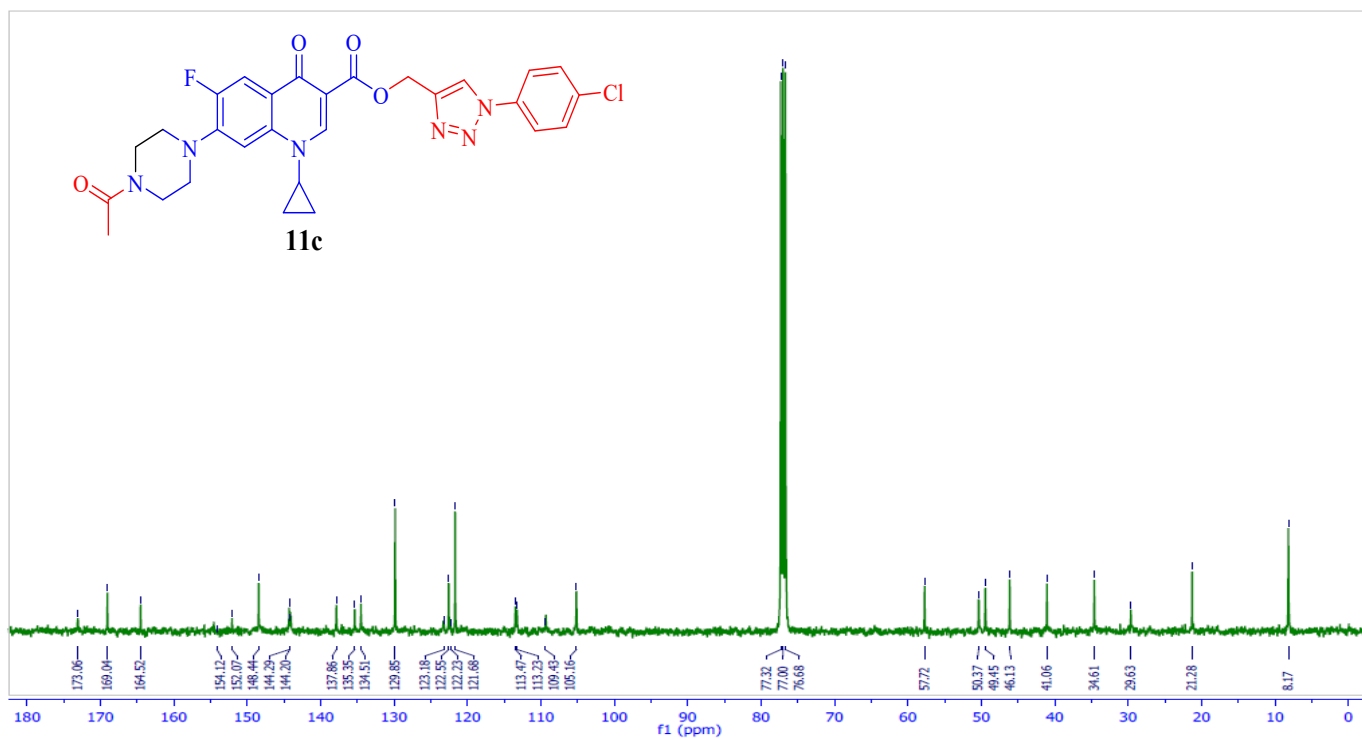

HRMS spectrum of compound **11c**

|                               |              |                      |                        |
|-------------------------------|--------------|----------------------|------------------------|
| <b>Data File</b>              | CPR-21.d     | <b>Sample Name</b>   | CPR-21                 |
| <b>Sample Type</b>            | Sample       | <b>Position</b>      | P1-E3                  |
| <b>Instrument Name</b>        | Instrument 1 | <b>User Name</b>     |                        |
| <b>Acq Method</b>             | MS Scan.m    | <b>Acquired Time</b> | 01-06-2023<br>16:20:26 |
| <b>IRM Calibration Status</b> | Success      | <b>DA Method</b>     | Default.m              |
| <b>Comment</b>                |              |                      |                        |

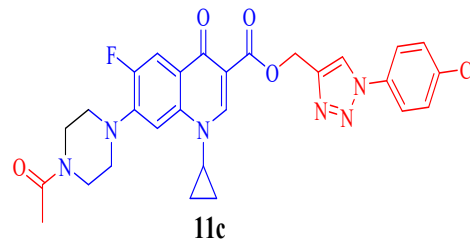

|                               |                                                         |              |   |
|-------------------------------|---------------------------------------------------------|--------------|---|
| <b>Sample Group</b>           |                                                         | <b>Info.</b> | 3 |
| <b>Acquisition SW Version</b> | 6200 series TOF/6500<br>series Q-TOF B.05.01<br>(B5125) |              |   |

### Compound Table

| Compound Label            | RT    | Mass     | Abund | Formula            | Tgt Mass | Diff (ppm) | MFG Formula        | DB Formula         |
|---------------------------|-------|----------|-------|--------------------|----------|------------|--------------------|--------------------|
| Cpd 1: C28 H26 Cl F N6 O4 | 0.094 | 564.1706 | 10896 | C28 H26 Cl F N6 O4 | 564.1688 | 3.11       | C28 H26 Cl F N6 O4 | C28 H26 Cl F N6 O4 |

| Compound Label            | m/z      | RT    | Algorithm       | Mass     |
|---------------------------|----------|-------|-----------------|----------|
| Cpd 1: C28 H26 Cl F N6 O4 | 587.1593 | 0.094 | Find By Formula | 564.1706 |

### MS Zoomed Spectrum

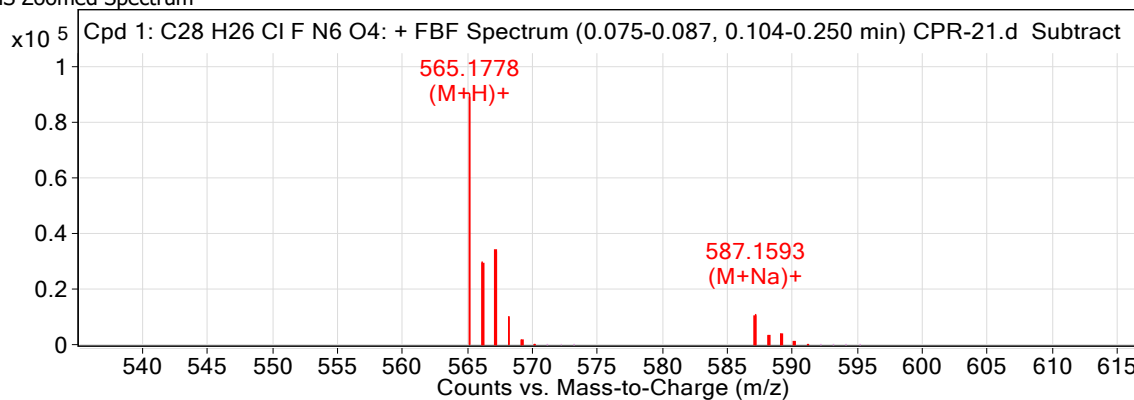

### MS Spectrum Peak List

| m/z      | z | Abund    | Formula         | Ion     |
|----------|---|----------|-----------------|---------|
| 565.1778 | 1 | 90269.87 | C28H27ClFN6O4   | (M+H)+  |
| 566.181  | 1 | 29599.46 | C28H27ClFN6O4   | (M+H)+  |
| 567.1766 | 1 | 33482.64 | C28H27ClFN6O4   | (M+H)+  |
| 568.1784 | 1 | 9777.26  | C28H27ClFN6O4   | (M+H)+  |
| 569.1801 | 1 | 1606.94  | C28H27ClFN6O4   | (M+H)+  |
| 570.1822 | 1 | 185.51   | C28H27ClFN6O4   | (M+H)+  |
| 587.1593 | 1 | 10896.08 | C28H26ClFN6NaO4 | (M+Na)+ |
| 588.1619 | 1 | 3271.19  | C28H26ClFN6NaO4 | (M+Na)+ |
| 589.1575 | 1 | 3797.24  | C28H26ClFN6NaO4 | (M+Na)+ |
| 590.1595 | 1 | 1075.09  | C28H26ClFN6NaO4 | (M+Na)+ |

--- End Of Report ---

<sup>1</sup>H-NMR spectrum of compound **11d**

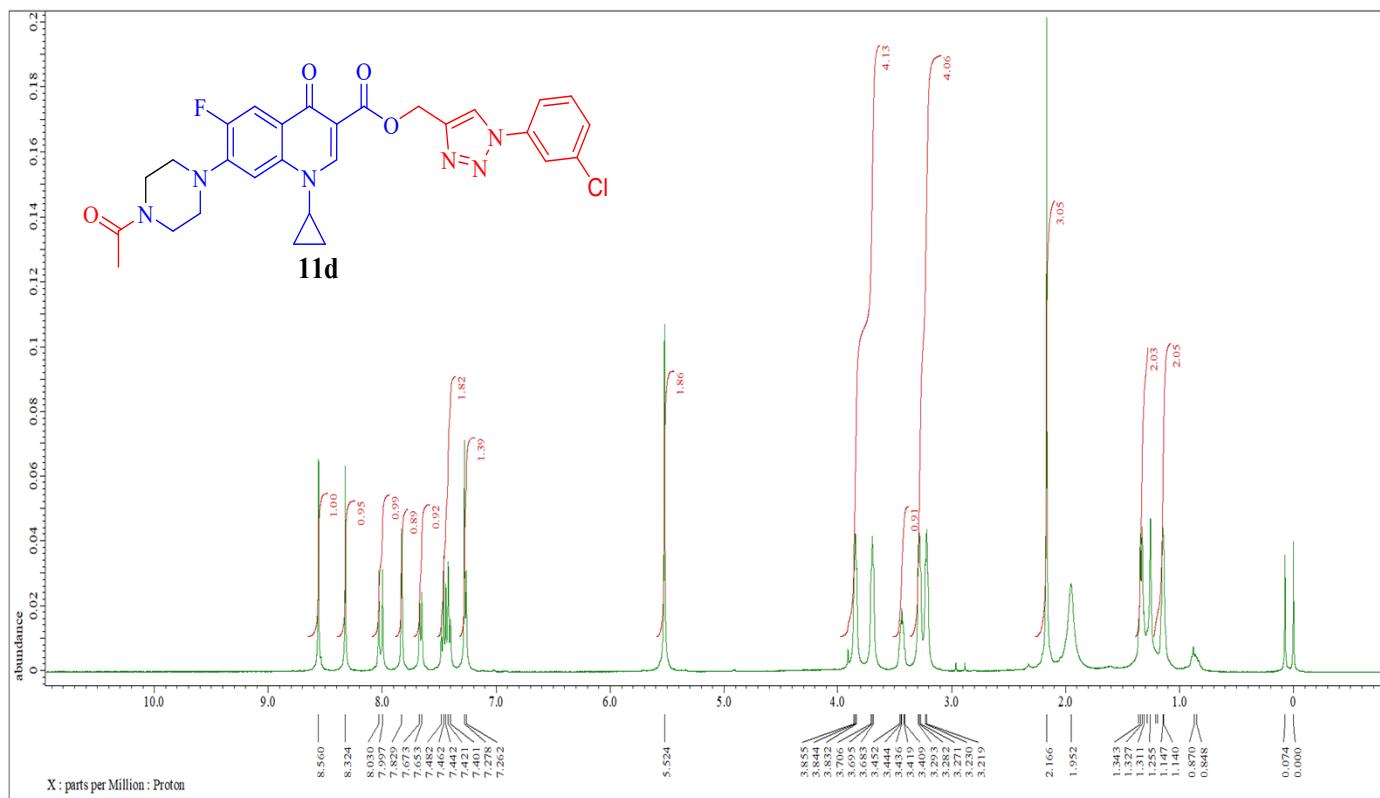

<sup>13</sup>C-NMR spectrum of compound **11d**

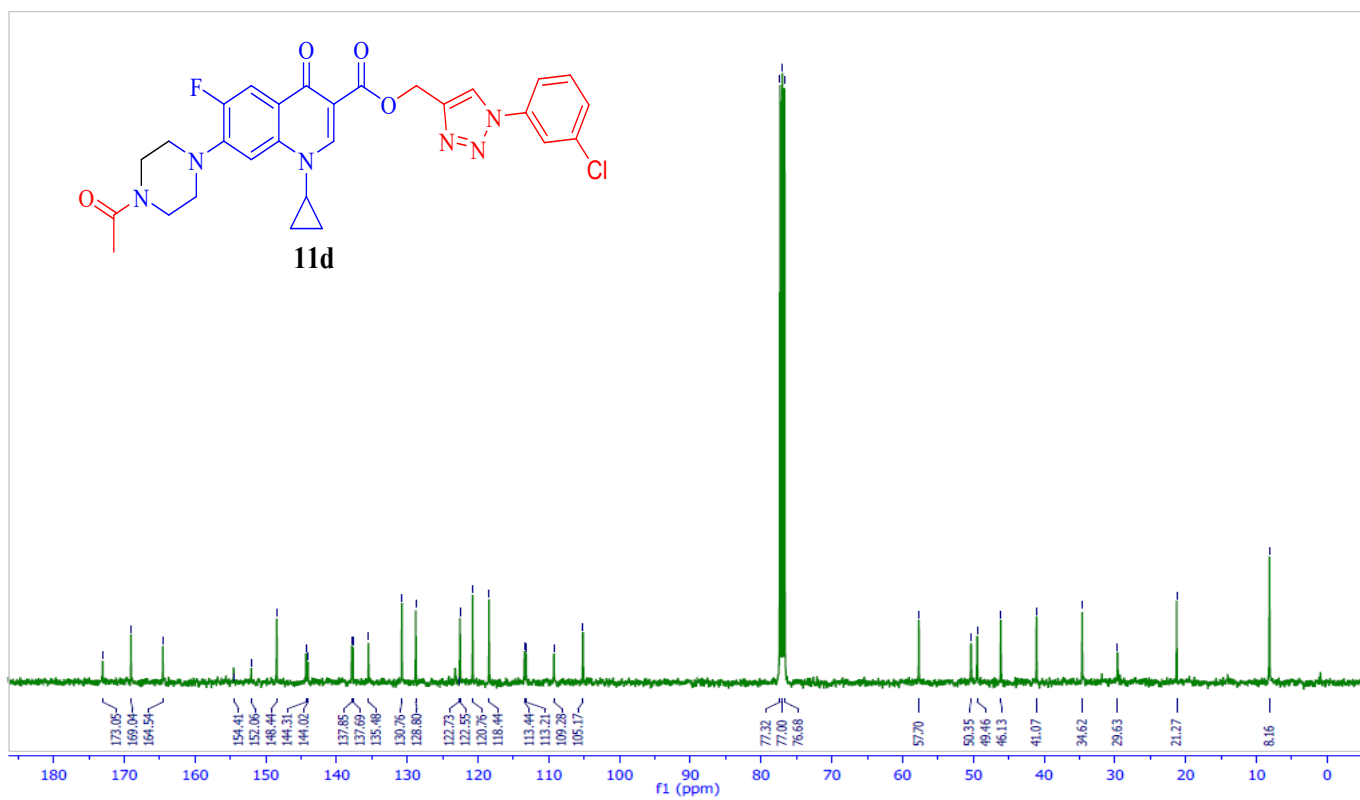

HRMS spectrum of compound **11d**

|                               |              |                        |                        |
|-------------------------------|--------------|------------------------|------------------------|
| <b>Data File</b>              | CPR-22.d     | <b>Sample Name</b>     | CPR-22                 |
| <b>Sample Type</b>            | Sample       | <b>Sample Position</b> | P1-E4                  |
| <b>Instrument Name</b>        | Instrument 1 | <b>User Name</b>       |                        |
| <b>Acq Method</b>             | MS Scan.m    | <b>Acquired Time</b>   | 01-06-2023<br>16:22:14 |
| <b>IRM Calibration Status</b> | Success      | <b>DA Method</b>       | Default.m              |

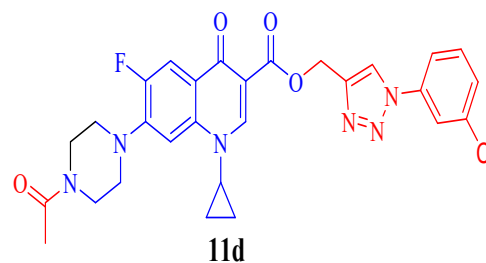

|                               |                                                   |              |   |
|-------------------------------|---------------------------------------------------|--------------|---|
| <b>Sample Group</b>           |                                                   | <b>Info.</b> | 3 |
| <b>Acquisition SW Version</b> | 6200 series TOF/6500 series Q-TOF B.05.01 (B5125) |              |   |

### CompoundTable

| Compound Label            | RT    | Mass     | Abund | Formula            | Tgt Mass | Diff (ppm) | MFG Formula        | DB Formula         |
|---------------------------|-------|----------|-------|--------------------|----------|------------|--------------------|--------------------|
| Cpd 1: C28 H26 Cl F N6 O4 | 0.095 | 564.1707 | 11509 | C28 H26 Cl F N6 O4 | 564.1688 | 3.36       | C28 H26 Cl F N6 O4 | C28 H26 Cl F N6 O4 |

| Compound Label            | m/z      | RT    | Algorithm       | Mass     |
|---------------------------|----------|-------|-----------------|----------|
| Cpd 1: C28 H26 Cl F N6 O4 | 587.1596 | 0.095 | Find By Formula | 564.1707 |

### MS Zoomed Spectrum

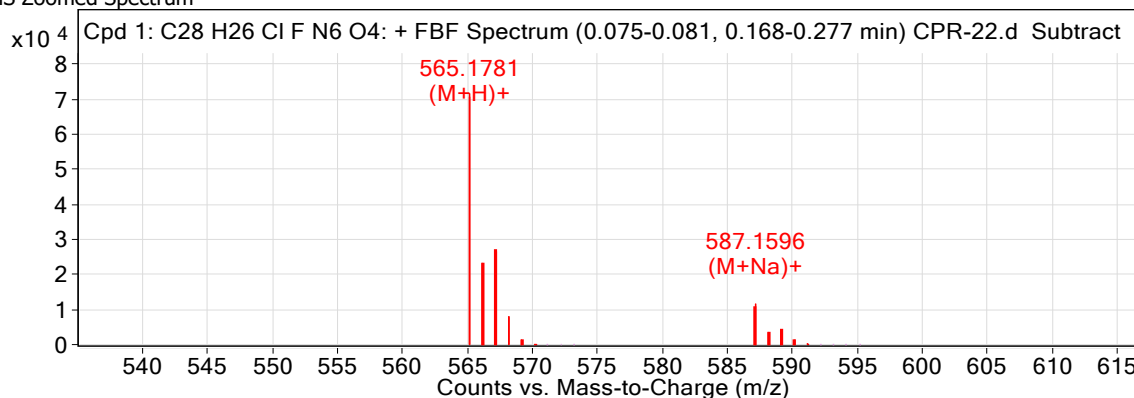

### MS Spectrum Peak List

| m/z      | z | Abund    | Formula         | Ion     |
|----------|---|----------|-----------------|---------|
| 565.1781 | 1 | 71660.22 | C28H27ClFN6O4   | (M+H)+  |
| 566.181  | 1 | 23145.7  | C28H27ClFN6O4   | (M+H)+  |
| 567.1766 | 1 | 26514.95 | C28H27ClFN6O4   | (M+H)+  |
| 568.1783 | 1 | 7574.51  | C28H27ClFN6O4   | (M+H)+  |
| 569.1805 | 1 | 1257.58  | C28H27ClFN6O4   | (M+H)+  |
| 570.1837 | 1 | 118.32   | C28H27ClFN6O4   | (M+H)+  |
| 587.1596 | 1 | 11508.69 | C28H26ClFN6NaO4 | (M+Na)+ |
| 588.1622 | 1 | 3405.61  | C28H26ClFN6NaO4 | (M+Na)+ |
| 589.1577 | 1 | 3969.61  | C28H26ClFN6NaO4 | (M+Na)+ |
| 590.1599 | 1 | 1101.06  | C28H26ClFN6NaO4 | (M+Na)+ |
| 591.1616 | 1 | 131.83   | C28H26ClFN6NaO4 | (M+Na)+ |

--- End Of Report ---

<sup>1</sup>H-NMR spectrum of compound **11e**

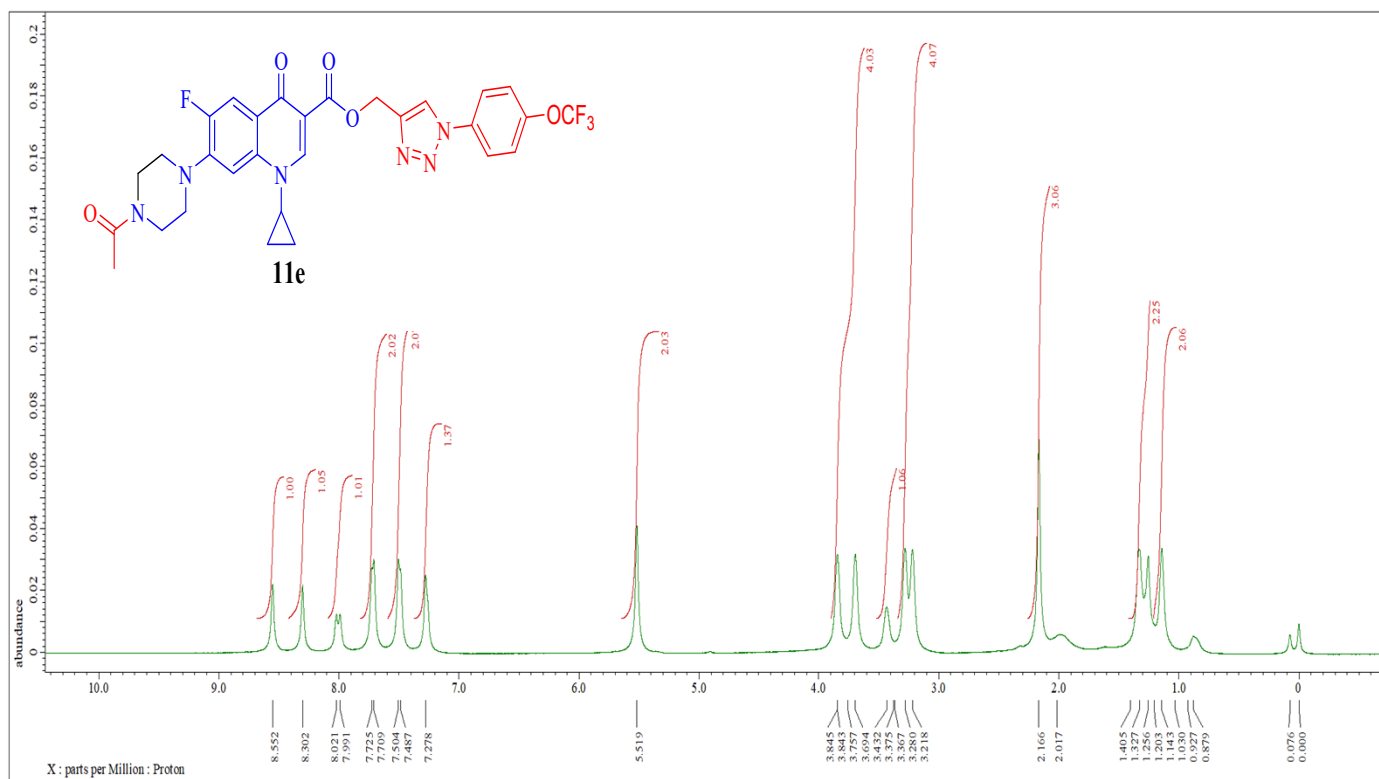

<sup>13</sup>C-NMR spectrum of compound **11e**

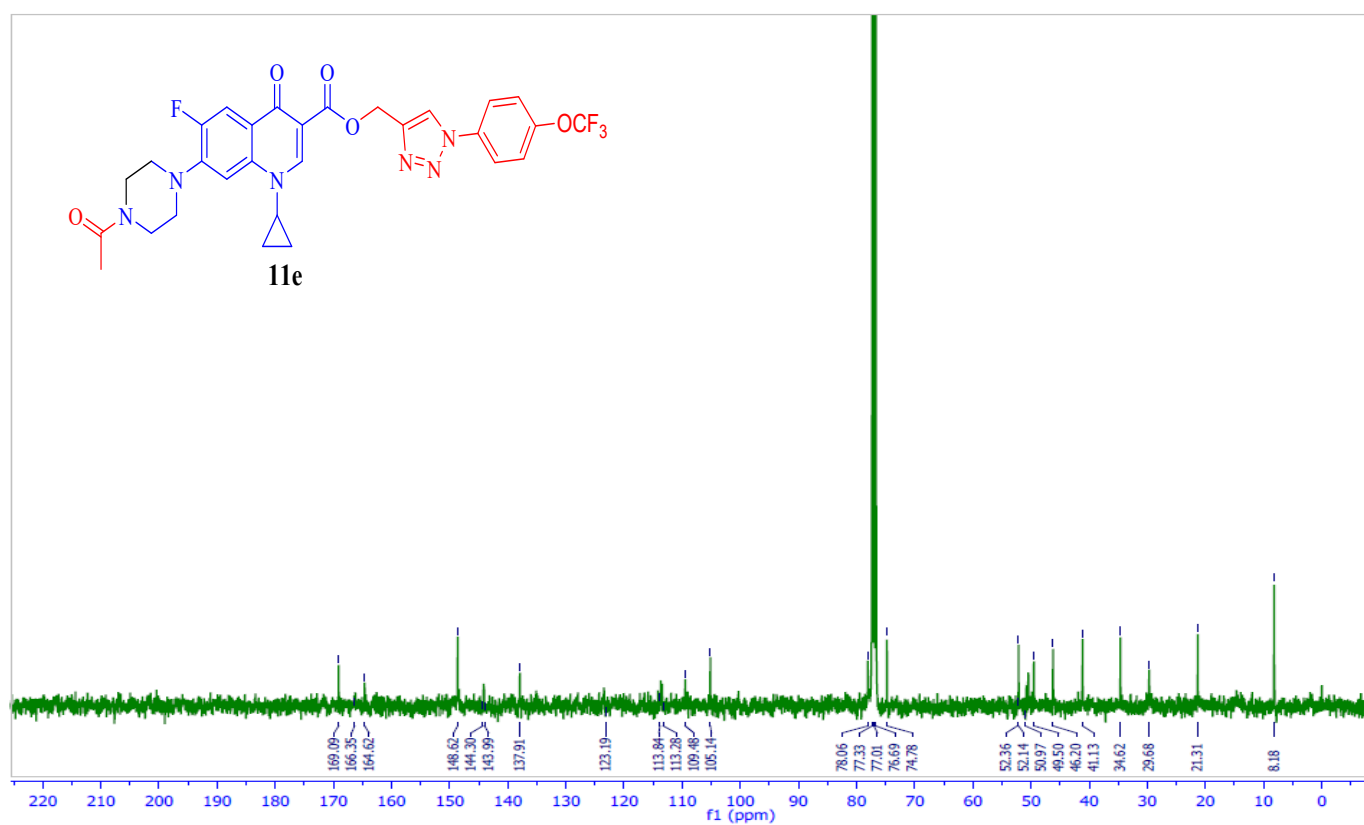

<sup>19</sup>F-NMR spectrum of compound **11e**



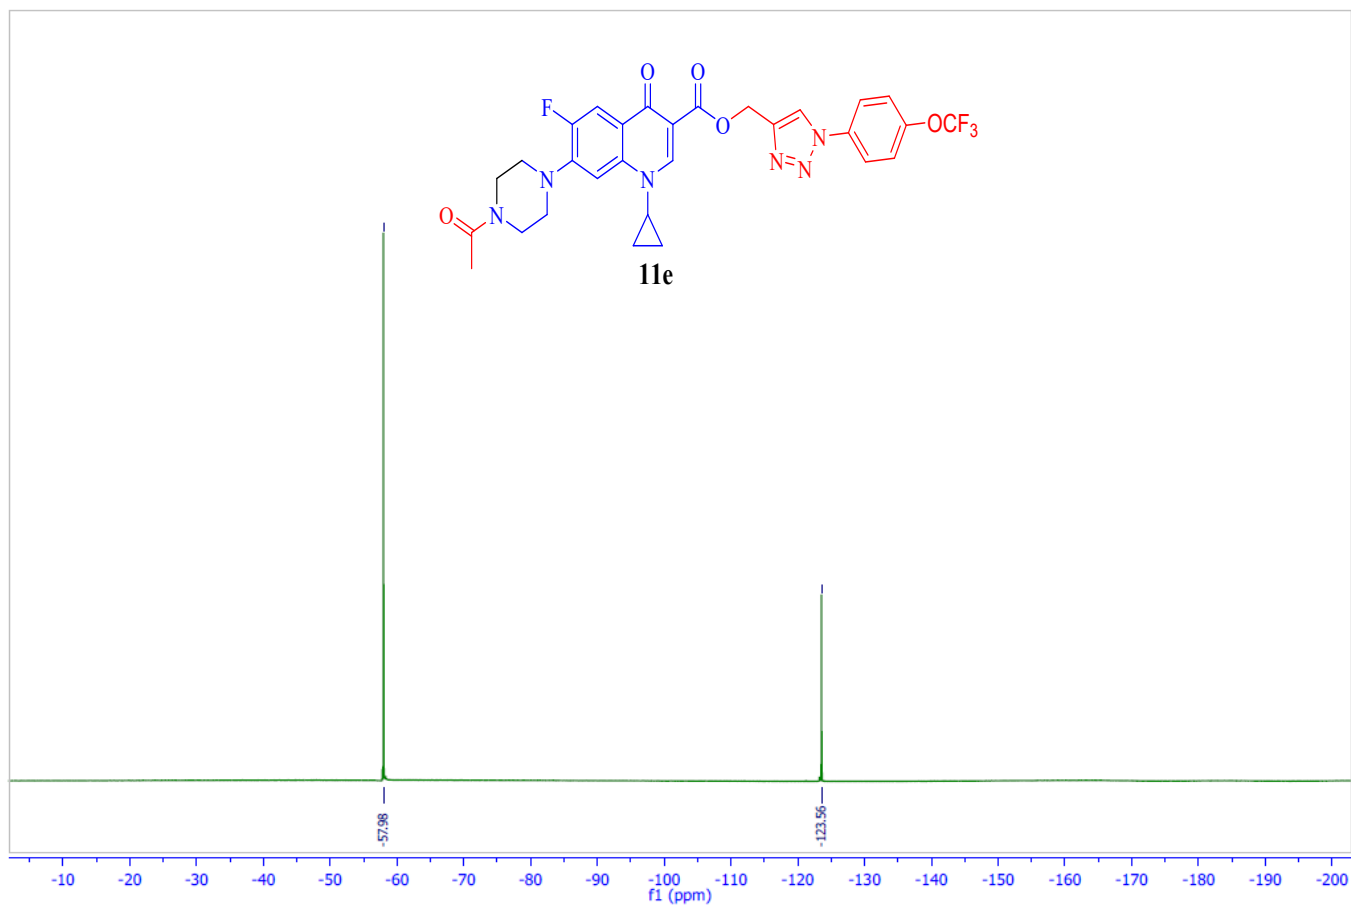

HRMS spectrum of compound **11e**

|                               |              |                      |                        |
|-------------------------------|--------------|----------------------|------------------------|
| <b>Data File</b>              | CPR-23.d     | <b>Sample Name</b>   | CPR-23                 |
| <b>Sample Type</b>            | Sample       | <b>Position</b>      | P1-E5                  |
| <b>Instrument Name</b>        | Instrument 1 | <b>User Name</b>     |                        |
| <b>Acq Method</b>             | MS Scan.m    | <b>Acquired Time</b> | 01-06-2023<br>16:34:43 |
| <b>IRM Calibration Status</b> | Success      | <b>DA Method</b>     | Default.m              |
| <b>Comment</b>                |              |                      |                        |

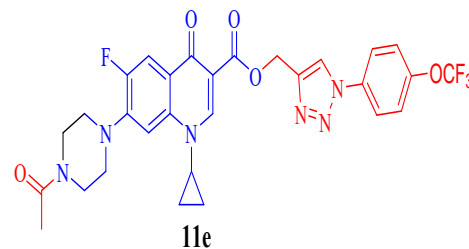

|                               |                                                         |              |   |
|-------------------------------|---------------------------------------------------------|--------------|---|
| <b>Sample Group</b>           |                                                         | <b>Info.</b> | 3 |
| <b>Acquisition SW Version</b> | 6200 series TOF/6500<br>series Q-TOF B.05.01<br>(B5125) |              |   |

### Compound Table

| Compound Label                                                                      | RT    | Mass     | Abund | Formula                                                                      | Tgt Mass | Diff (ppm) | MFG Formula                                                                  | DB Formula                                                                   |
|-------------------------------------------------------------------------------------|-------|----------|-------|------------------------------------------------------------------------------|----------|------------|------------------------------------------------------------------------------|------------------------------------------------------------------------------|
| Cpd 1: C <sub>29</sub> H <sub>26</sub> F <sub>4</sub> N <sub>6</sub> O <sub>5</sub> | 0.096 | 614.1921 | 6709  | C <sub>29</sub> H <sub>26</sub> F <sub>4</sub> N <sub>6</sub> O <sub>5</sub> | 614.1901 | 3.35       | C <sub>29</sub> H <sub>26</sub> F <sub>4</sub> N <sub>6</sub> O <sub>5</sub> | C <sub>29</sub> H <sub>26</sub> F <sub>4</sub> N <sub>6</sub> O <sub>5</sub> |

| Compound Label                                                                      | m/z      | RT    | Algorithm       | Mass     |
|-------------------------------------------------------------------------------------|----------|-------|-----------------|----------|
| Cpd 1: C <sub>29</sub> H <sub>26</sub> F <sub>4</sub> N <sub>6</sub> O <sub>5</sub> | 637.1807 | 0.096 | Find By Formula | 614.1921 |

### MS Zoomed Spectrum

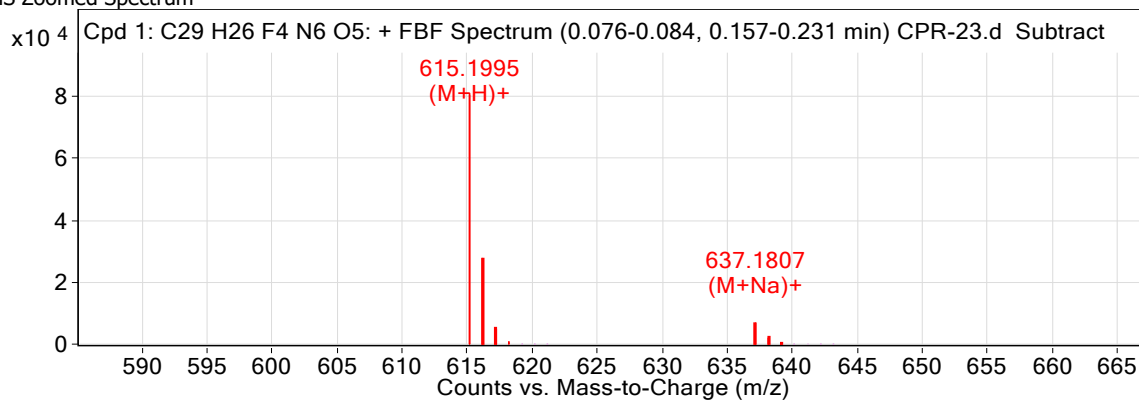

### MS Spectrum Peak List

| m/z      | z | Abund    | Formula                                                                        | Ion                 |
|----------|---|----------|--------------------------------------------------------------------------------|---------------------|
| 615.1995 | 1 | 81111.67 | C <sub>29</sub> H <sub>27</sub> F <sub>4</sub> N <sub>6</sub> O <sub>5</sub>   | (M+H) <sup>+</sup>  |
| 616.2025 | 1 | 27492.97 | C <sub>29</sub> H <sub>27</sub> F <sub>4</sub> N <sub>6</sub> O <sub>5</sub>   | (M+H) <sup>+</sup>  |
| 617.2047 | 1 | 5063.75  | C <sub>29</sub> H <sub>27</sub> F <sub>4</sub> N <sub>6</sub> O <sub>5</sub>   | (M+H) <sup>+</sup>  |
| 618.2073 | 1 | 652.4    | C <sub>29</sub> H <sub>27</sub> F <sub>4</sub> N <sub>6</sub> O <sub>5</sub>   | (M+H) <sup>+</sup>  |
| 637.1807 | 1 | 6708.84  | C <sub>29</sub> H <sub>26</sub> F <sub>4</sub> N <sub>6</sub> NaO <sub>5</sub> | (M+Na) <sup>+</sup> |
| 638.1834 | 1 | 2130.26  | C <sub>29</sub> H <sub>26</sub> F <sub>4</sub> N <sub>6</sub> NaO <sub>5</sub> | (M+Na) <sup>+</sup> |
| 639.1859 | 1 | 376.75   | C <sub>29</sub> H <sub>26</sub> F <sub>4</sub> N <sub>6</sub> NaO <sub>5</sub> | (M+Na) <sup>+</sup> |

--- End Of Report ---

<sup>1</sup>H-NMR spectrum of compound **11f**

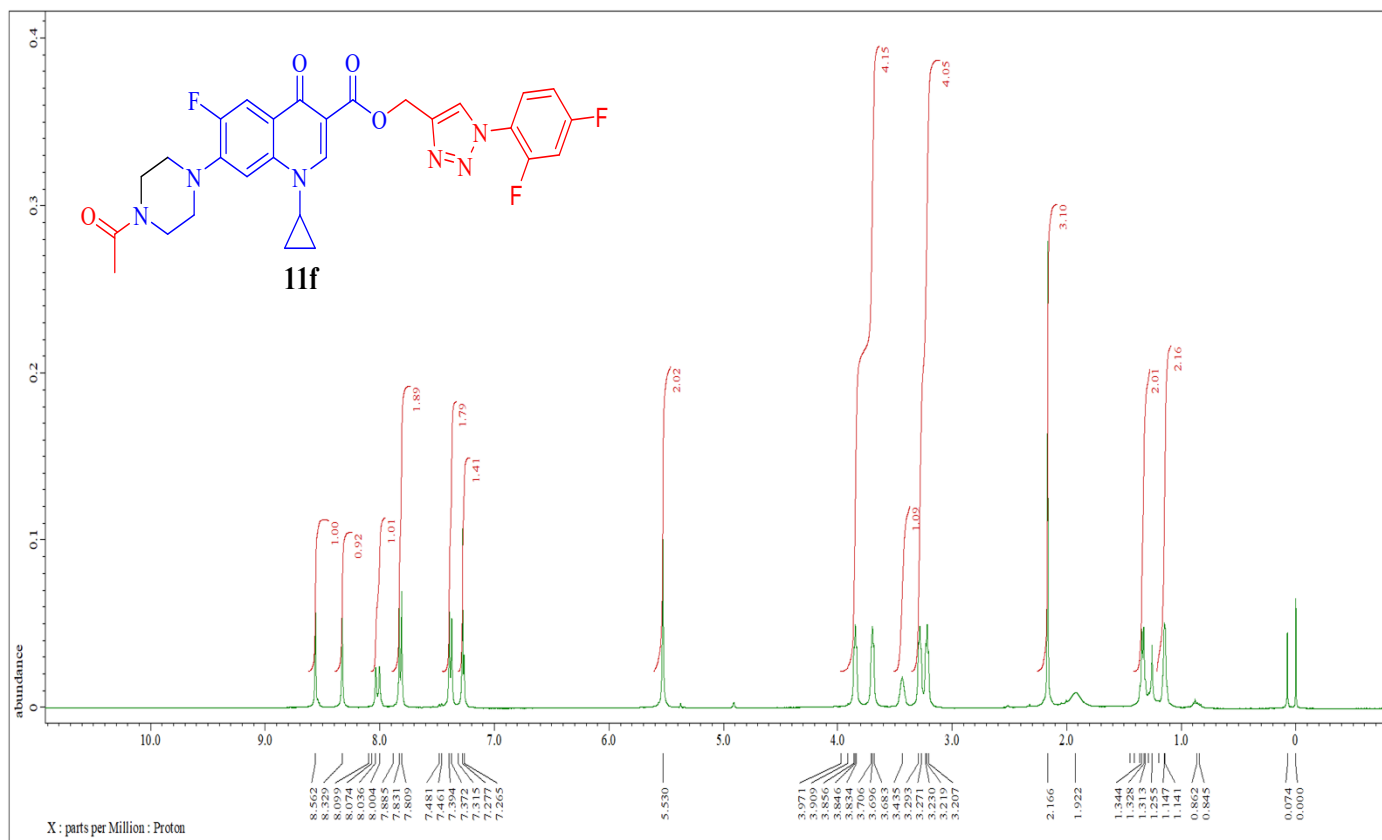

<sup>13</sup>C-NMR spectrum of compound **11f**

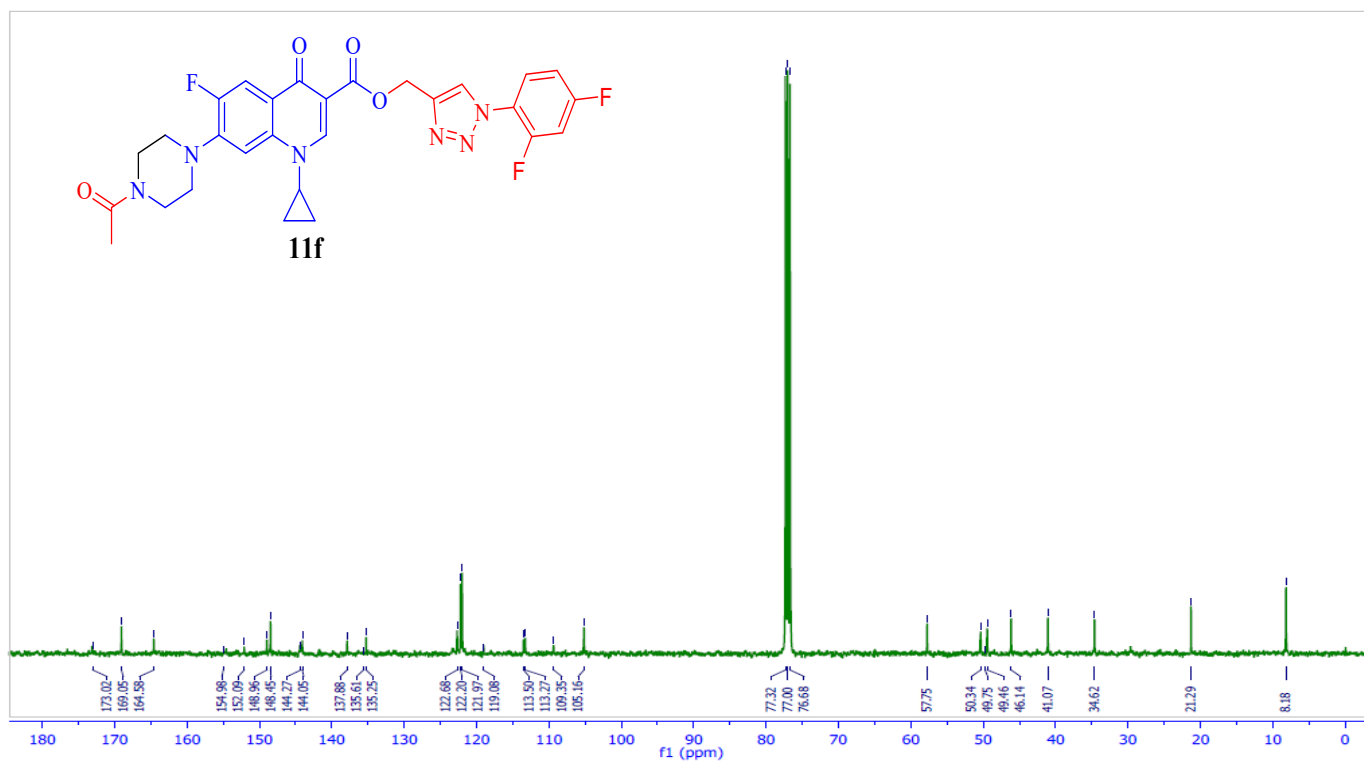

<sup>19</sup>F-NMR spectrum of compound **11f**

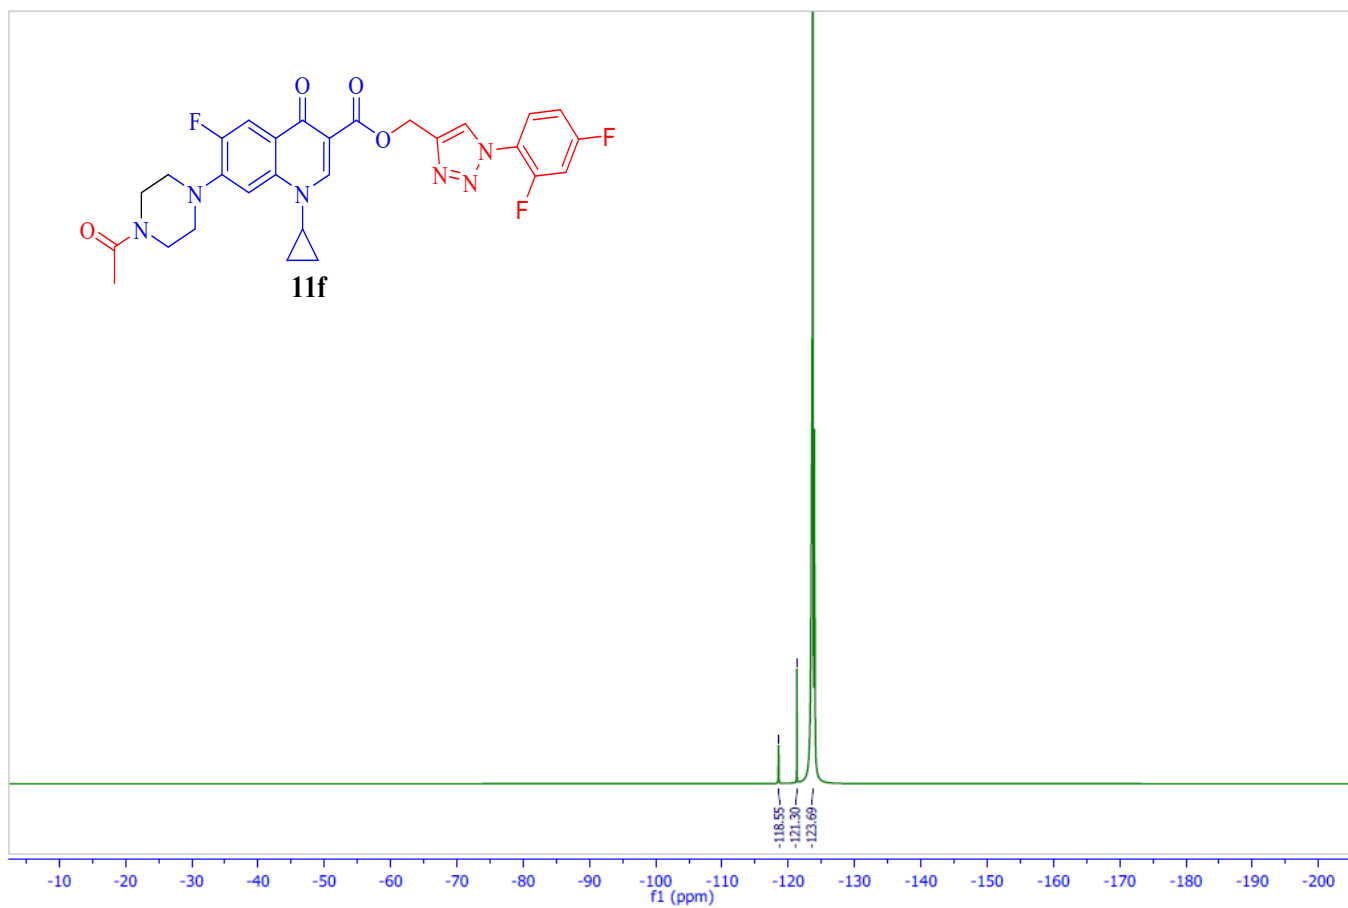

HRMS spectrum of compound **11f**

**Data File** CPR-24.d  
**Sample Name** CPR-24  
**Sample Type** Sample  
**Position** P1-E6  
**Instrument Name** Instrument 1  
**User Name**  
**Acq Method** MS Scan.m  
**Acquired Time** 01-06-2023 16:37:37  
**DA Method** Default.m  
**IRM Calibration Status** Success  
**Comment**

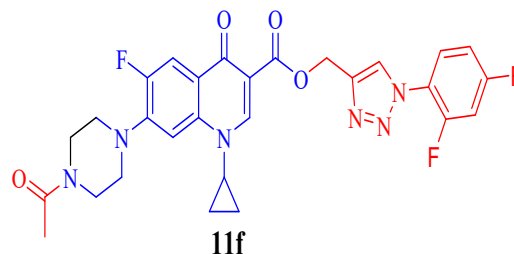

**Sample Group** Info. 3  
**Acquisition SW Version** 6200 series  
 TOF/6500 series Q-TOF B.05.01 (B5125)

### Compound Table

| Compound Label                                                                      | RT    | Mass     | Abund | Formula                                                                      | Tgt Mass | Diff (ppm) | MFG Formula                                                                  | DB Formula                                                                   |
|-------------------------------------------------------------------------------------|-------|----------|-------|------------------------------------------------------------------------------|----------|------------|------------------------------------------------------------------------------|------------------------------------------------------------------------------|
| Cpd 1: C <sub>28</sub> H <sub>25</sub> F <sub>3</sub> N <sub>6</sub> O <sub>4</sub> | 0.099 | 566.1902 | 11498 | C <sub>28</sub> H <sub>25</sub> F <sub>3</sub> N <sub>6</sub> O <sub>4</sub> | 566.1889 | 2.25       | C <sub>28</sub> H <sub>25</sub> F <sub>3</sub> N <sub>6</sub> O <sub>4</sub> | C <sub>28</sub> H <sub>25</sub> F <sub>3</sub> N <sub>6</sub> O <sub>4</sub> |

| Compound Label                                                                      | m/z      | RT    | Algorithm       | Mass     |
|-------------------------------------------------------------------------------------|----------|-------|-----------------|----------|
| Cpd 1: C <sub>28</sub> H <sub>25</sub> F <sub>3</sub> N <sub>6</sub> O <sub>4</sub> | 567.1976 | 0.099 | Find By Formula | 566.1902 |

### MS Zoomed Spectrum

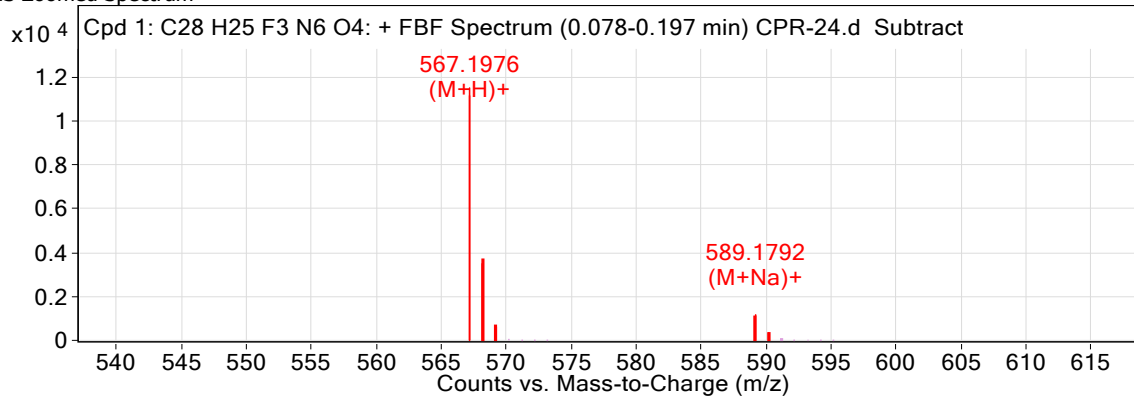

### MS Spectrum Peak List

| m/z      | z | Abund    | Formula                                                                        | Ion                 |
|----------|---|----------|--------------------------------------------------------------------------------|---------------------|
| 567.1976 | 1 | 11498.28 | C <sub>28</sub> H <sub>26</sub> F <sub>3</sub> N <sub>6</sub> O <sub>4</sub>   | (M+H) <sup>+</sup>  |
| 568.2003 | 1 | 3477.83  | C <sub>28</sub> H <sub>26</sub> F <sub>3</sub> N <sub>6</sub> O <sub>4</sub>   | (M+H) <sup>+</sup>  |
| 569.2023 | 1 | 589.49   | C <sub>28</sub> H <sub>26</sub> F <sub>3</sub> N <sub>6</sub> O <sub>4</sub>   | (M+H) <sup>+</sup>  |
| 589.1792 | 1 | 1143.53  | C <sub>28</sub> H <sub>25</sub> F <sub>3</sub> N <sub>6</sub> NaO <sub>4</sub> | (M+Na) <sup>+</sup> |
| 590.1821 | 1 | 340.76   | C <sub>28</sub> H <sub>25</sub> F <sub>3</sub> N <sub>6</sub> NaO <sub>4</sub> | (M+Na) <sup>+</sup> |

--- End Of Report ---

<sup>1</sup>H-NMR spectrum of compound **12a**

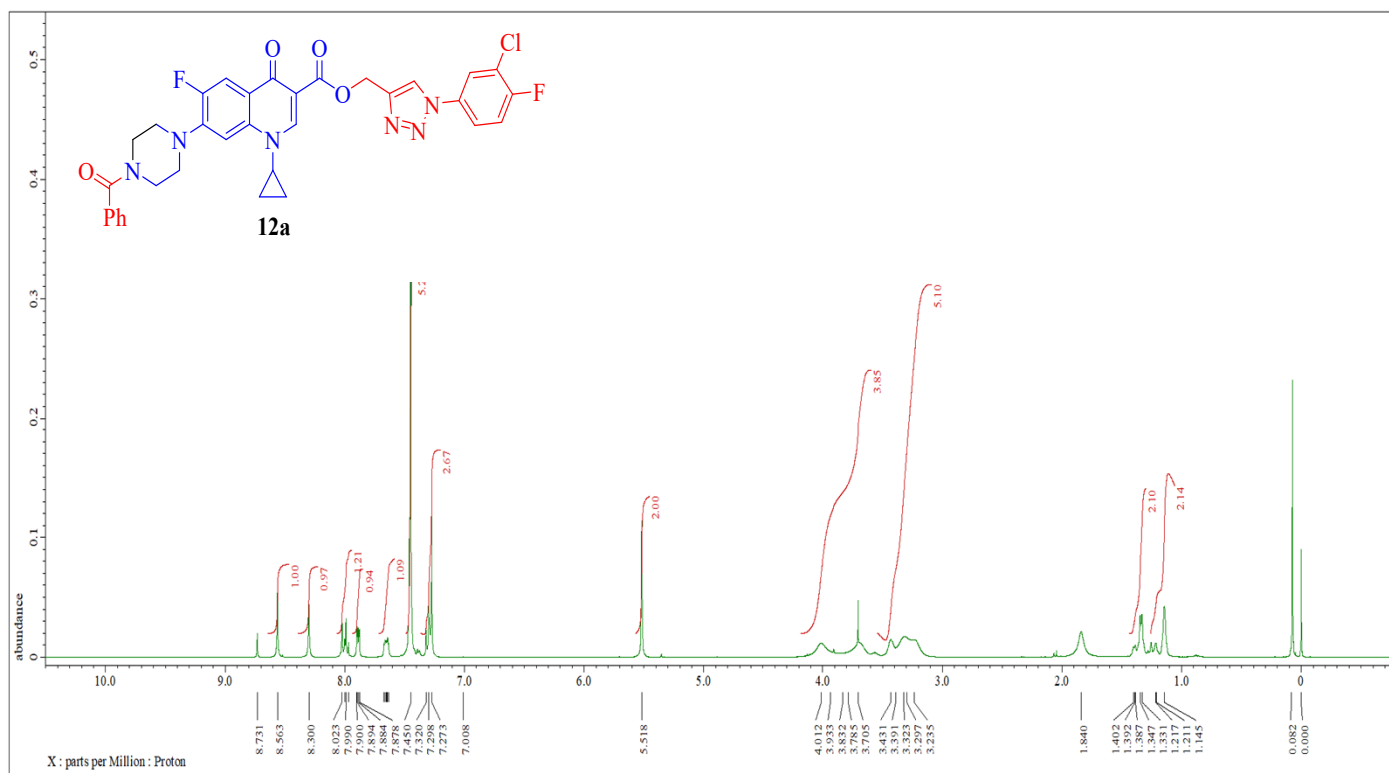

<sup>13</sup>C-NMR spectrum of compound 12a

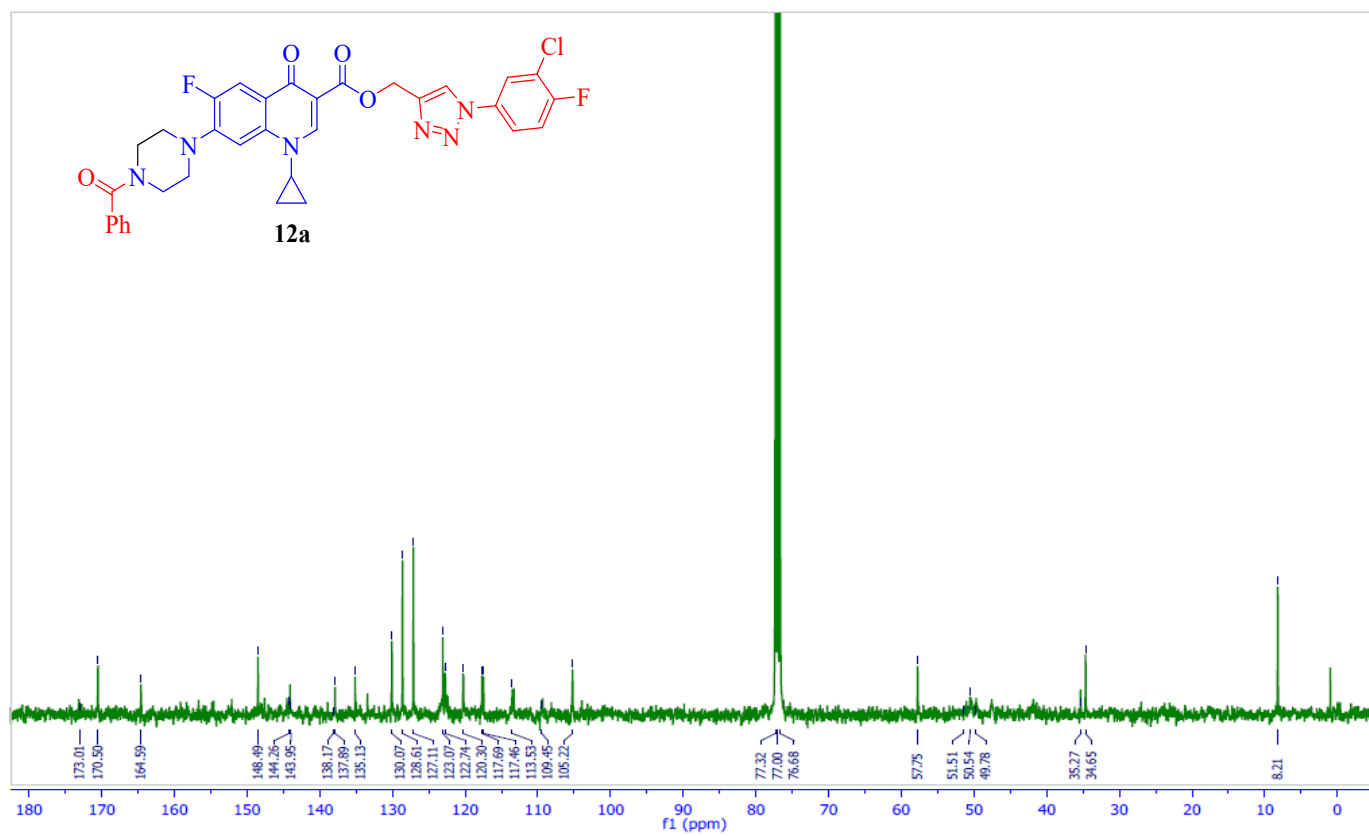

<sup>19</sup>F-NMR spectrum of compound 12a

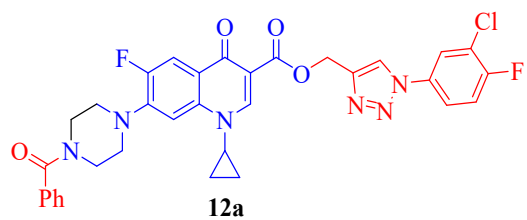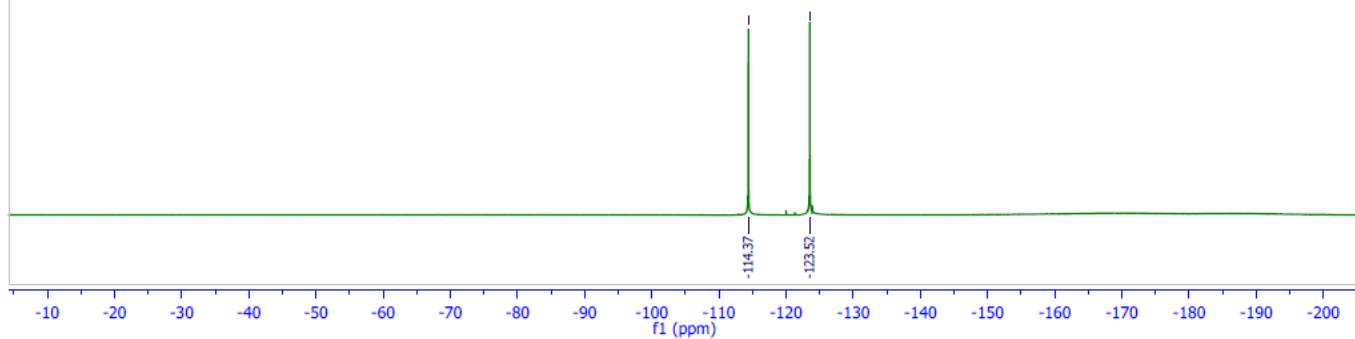

HRMS spectrum of compound **12a**

|                               |              |                        |                        |
|-------------------------------|--------------|------------------------|------------------------|
| <b>Data File</b>              | CPR-27.d     | <b>Sample Name</b>     | CPR-27                 |
| <b>Sample Type</b>            | Sample       | <b>Sample Position</b> | P1-C2                  |
| <b>Instrument Name</b>        | Instrument 1 | <b>User Name</b>       |                        |
| <b>Acq Method</b>             | MS Scan_02.m | <b>Acquired Time</b>   | 07-06-2023<br>15:40:00 |
| <b>IRM Calibration Status</b> | Success      | <b>DA Method</b>       | Default.m              |
| <b>Comment</b>                |              |                        |                        |

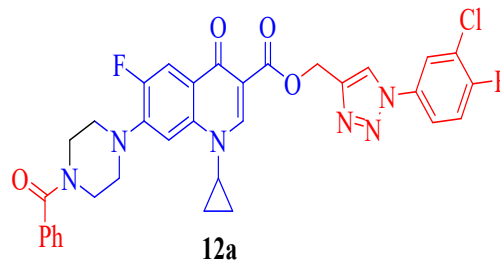

|                               |                                                   |              |   |
|-------------------------------|---------------------------------------------------|--------------|---|
| <b>Sample Group</b>           |                                                   | <b>Info.</b> | 3 |
| <b>Acquisition SW Version</b> | 6200 series TOF/6500 series Q-TOF B.05.01 (B5125) |              |   |

### Compound Table

| Compound Label             | RT    | Mass     | Abund | Formula             | Tgt Mass | Diff (ppm) | MFG Formula         | DB Formula          |
|----------------------------|-------|----------|-------|---------------------|----------|------------|---------------------|---------------------|
| Cpd 1: C33 H27 Cl F2 N6 O4 | 0.101 | 644.1756 | 37038 | C33 H27 Cl F2 N6 O4 | 644.175  | 0.93       | C33 H27 Cl F2 N6 O4 | C33 H27 Cl F2 N6 O4 |

| Compound Label             | m/z     | RT    | Algorithm       | Mass     |
|----------------------------|---------|-------|-----------------|----------|
| Cpd 1: C33 H27 Cl F2 N6 O4 | 645.183 | 0.101 | Find By Formula | 644.1756 |

### MS Zoomed Spectrum

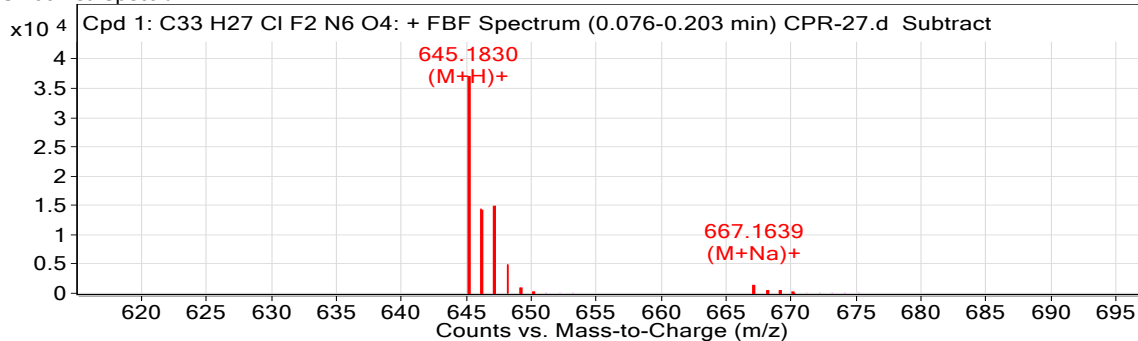

### MS Spectrum Peak List

| m/z      | z | Abund    | Formula          | Ion     |
|----------|---|----------|------------------|---------|
| 645.183  | 1 | 37037.52 | C33H28ClF2N6O4   | (M+H)+  |
| 646.186  | 1 | 14411.12 | C33H28ClF2N6O4   | (M+H)+  |
| 647.1819 | 1 | 14854.86 | C33H28ClF2N6O4   | (M+H)+  |
| 648.1833 | 1 | 4773.1   | C33H28ClF2N6O4   | (M+H)+  |
| 649.1853 | 1 | 888.66   | C33H28ClF2N6O4   | (M+H)+  |
| 650.1878 | 1 | 54.62    | C33H28ClF2N6O4   | (M+H)+  |
| 667.1639 | 1 | 1342.82  | C33H27ClF2N6NaO4 | (M+Na)+ |
| 668.1665 | 1 | 485.27   | C33H27ClF2N6NaO4 | (M+Na)+ |
| 669.1624 | 1 | 509.15   | C33H27ClF2N6NaO4 | (M+Na)+ |
| 670.1652 | 1 | 107.49   | C33H27ClF2N6NaO4 | (M+Na)+ |

--- End Of Report ---

<sup>1</sup>H-NMR spectrum of compound **12b**



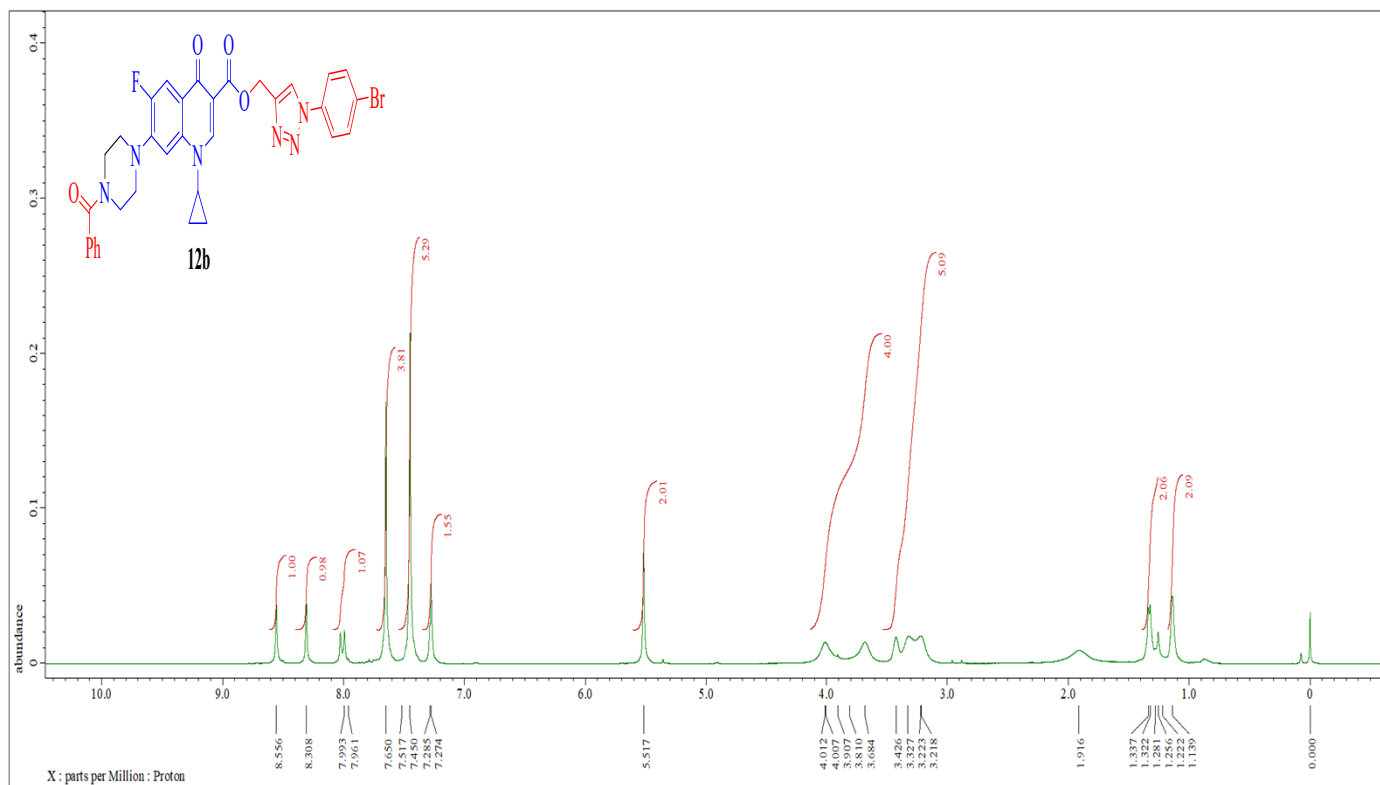

<sup>13</sup>C-NMR spectrum of compound 12b

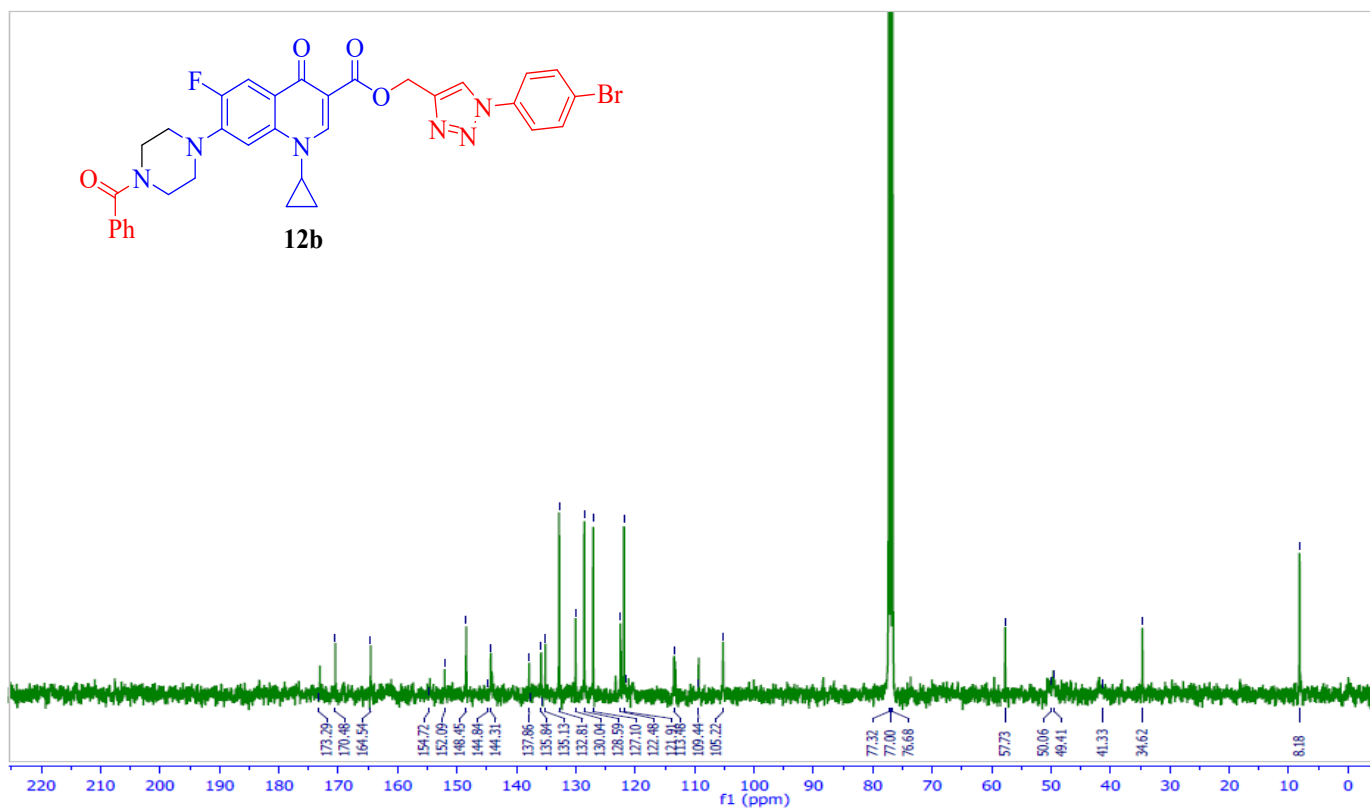

<sup>1</sup>H-NMR spectrum of compound 12c

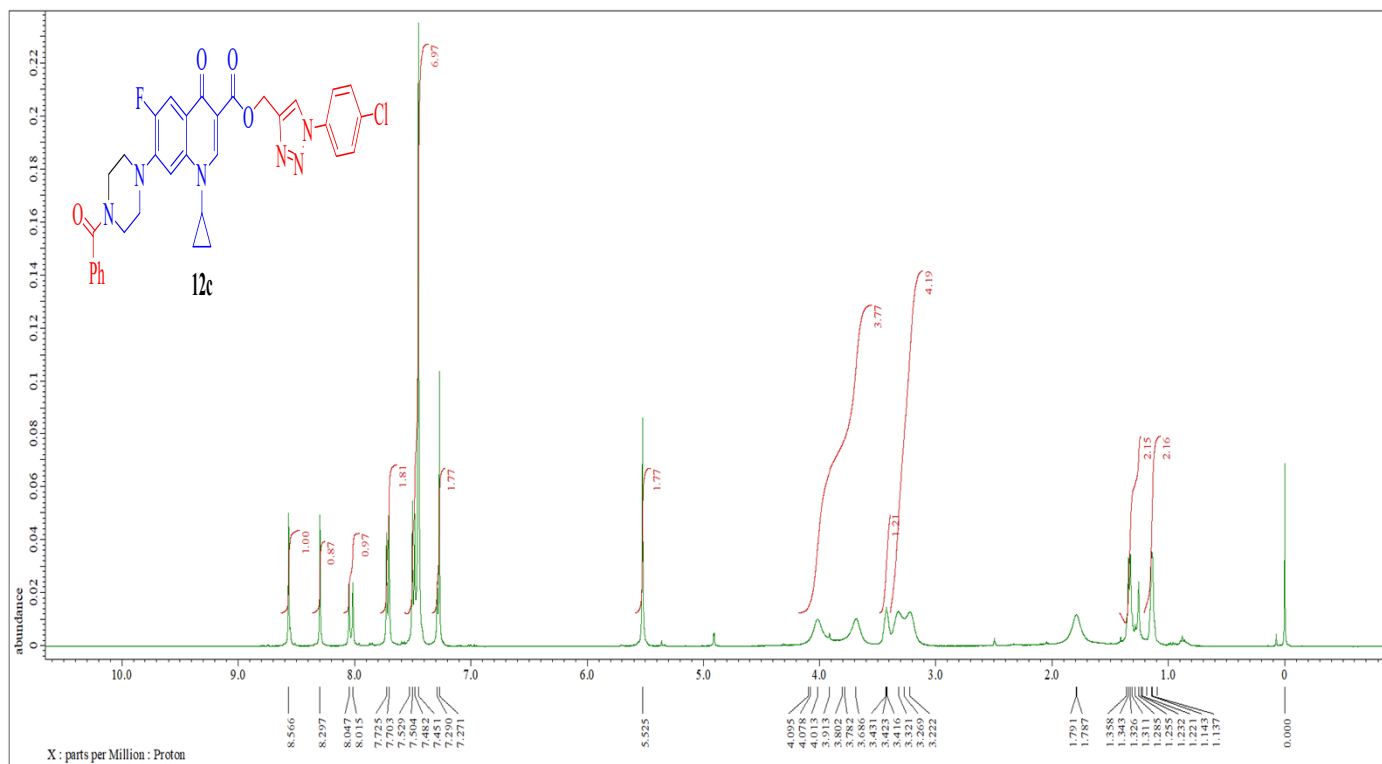

**<sup>13</sup>C-NMR spectrum of compound 12c**

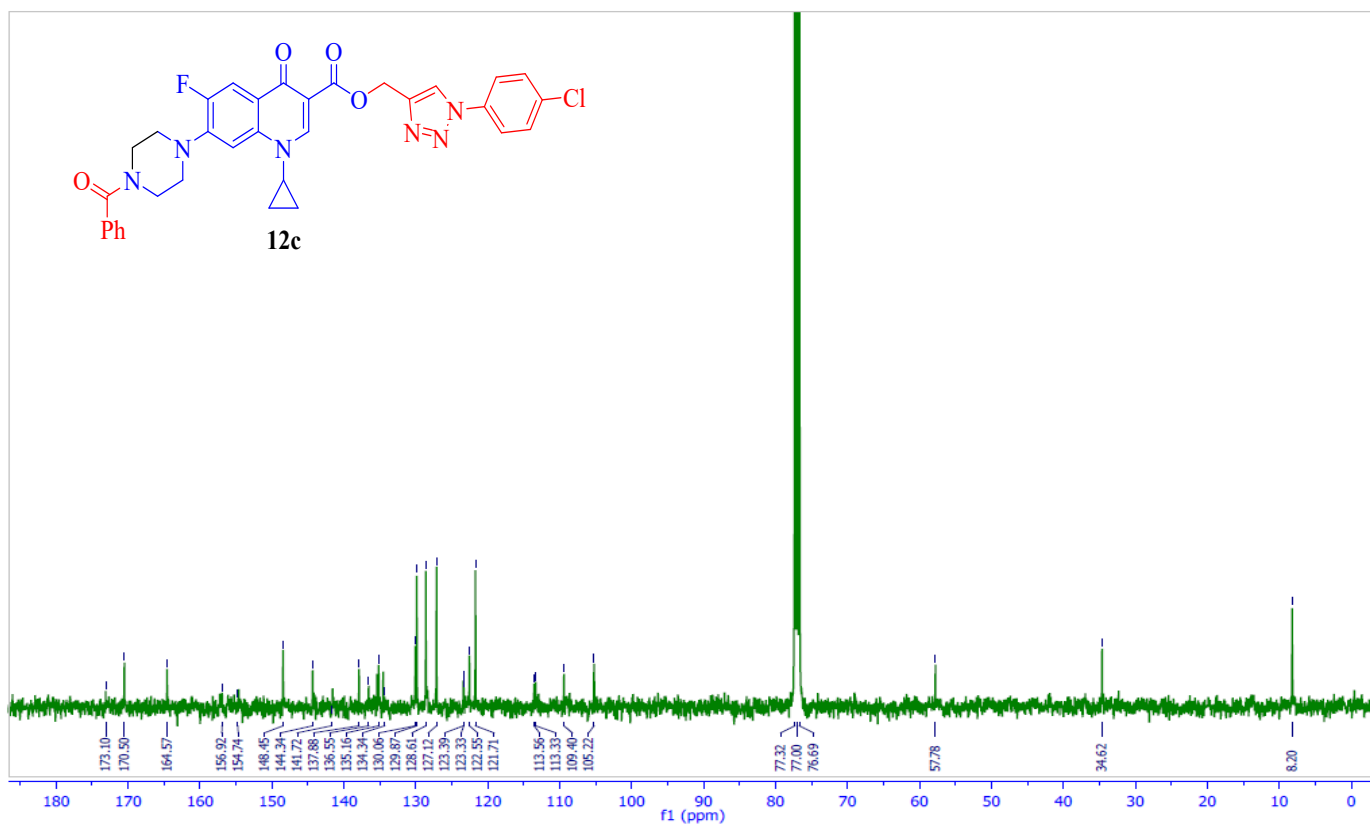

**HRMS spectrum of compound 12c**

**Data File** CPR-29.d **Sample Name** CPR-29  
**Sample Type** Sample **Sample Position** P1-C4  
**Instrument Name** Instrument 1 **User Name**  
**Acq Method** MS Scan\_02.m **Acquired Time** 07-06-2023 15:45:31  
**IRM Calibration Status** Success **DA Method** Default.m  
**Comment**

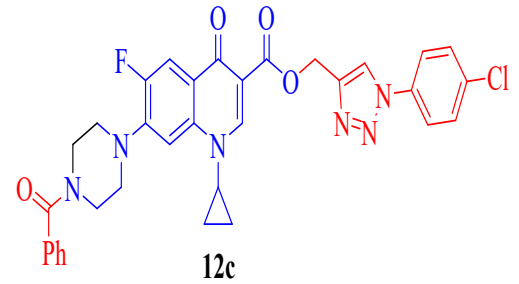

**Sample Group** Info. 3  
**Acquisition SW Version** 6200 series TOF/6500 series Q-TOF B.05.01 (B5125)

### Compound Table

| Compound Label            | RT    | Mass     | Abund | Formula            | Tgt Mass | Diff (ppm) | MFG Formula        | DB Formula         |
|---------------------------|-------|----------|-------|--------------------|----------|------------|--------------------|--------------------|
| Cpd 1: C33 H28 Cl F N6 O4 | 0.096 | 626.1855 | 57778 | C33 H28 Cl F N6 O4 | 626.1845 | 1.6        | C33 H28 Cl F N6 O4 | C33 H28 Cl F N6 O4 |

| Compound Label            | m/z      | RT    | Algorithm       | Mass     |
|---------------------------|----------|-------|-----------------|----------|
| Cpd 1: C33 H28 Cl F N6 O4 | 627.1926 | 0.096 | Find By Formula | 626.1855 |

### MS Zoomed Spectrum

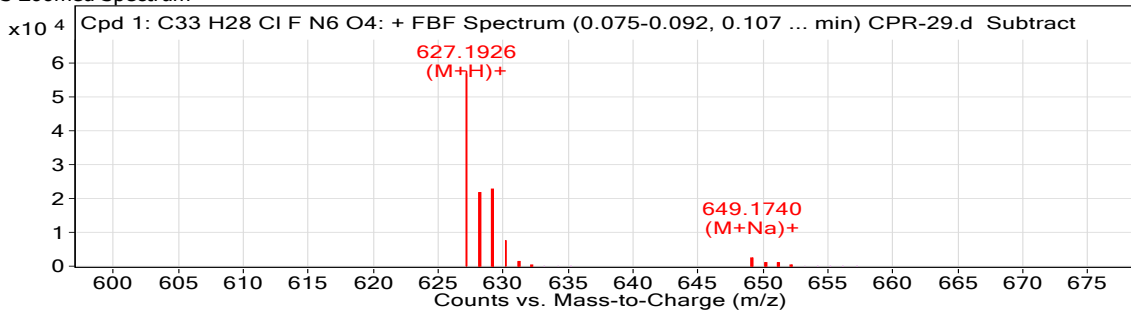

### MS Spectrum Peak List

| m/z      | z | Abund    | Formula         | Ion     |
|----------|---|----------|-----------------|---------|
| 627.1926 | 1 | 57778.17 | C33H29ClFN6O4   | (M+H)+  |
| 628.1961 | 1 | 21749.25 | C33H29ClFN6O4   | (M+H)+  |
| 629.1918 | 1 | 22451.2  | C33H29ClFN6O4   | (M+H)+  |
| 630.1934 | 1 | 7549.82  | C33H29ClFN6O4   | (M+H)+  |
| 631.1955 | 1 | 1414.02  | C33H29ClFN6O4   | (M+H)+  |
| 632.1977 | 1 | 156.17   | C33H29ClFN6O4   | (M+H)+  |
| 649.174  | 1 | 2505.56  | C33H28ClFN6NaO4 | (M+Na)+ |
| 650.1767 | 1 | 919.03   | C33H28ClFN6NaO4 | (M+Na)+ |
| 651.1725 | 1 | 919.59   | C33H28ClFN6NaO4 | (M+Na)+ |
| 652.1748 | 1 | 248.73   | C33H28ClFN6NaO4 | (M+Na)+ |

--- End Of Report ---

<sup>1</sup>H-NMR spectrum of compound **12d**

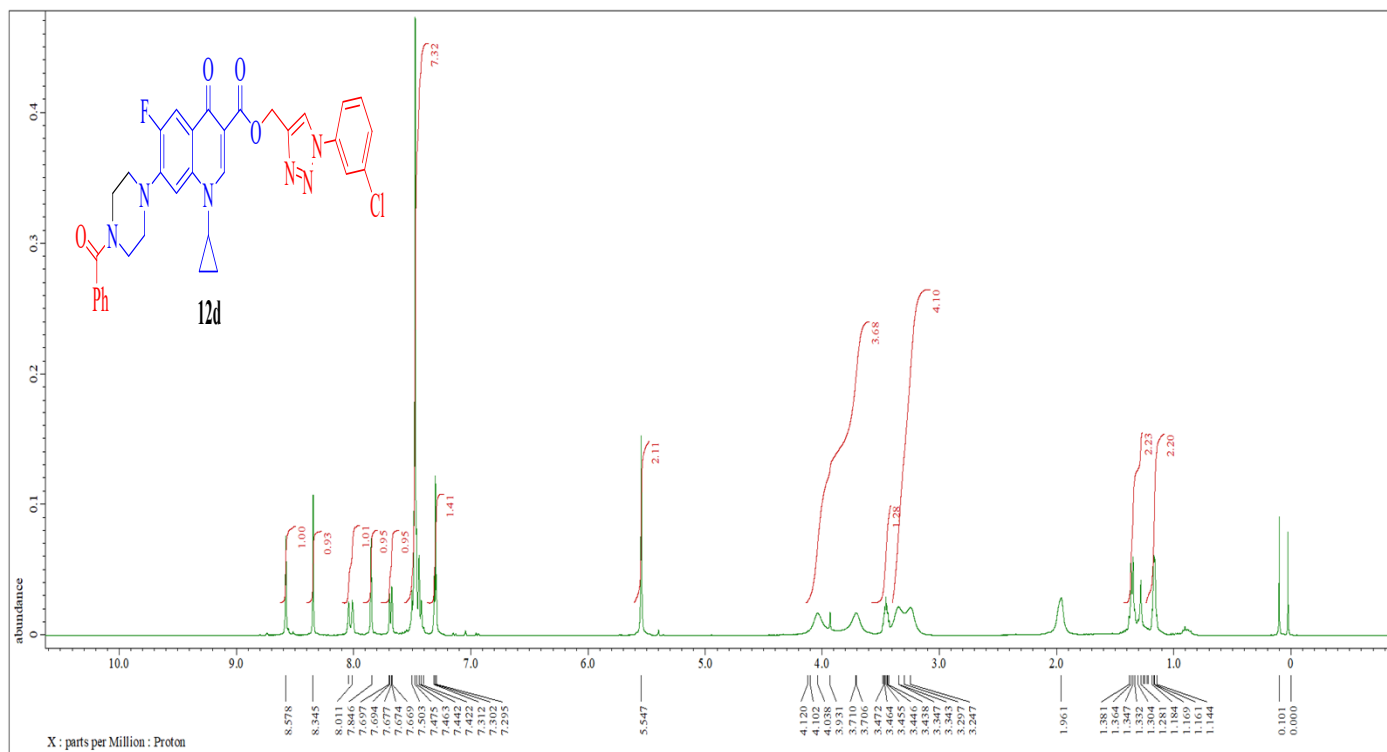

<sup>13</sup>C-NMR spectrum of compound **12d**

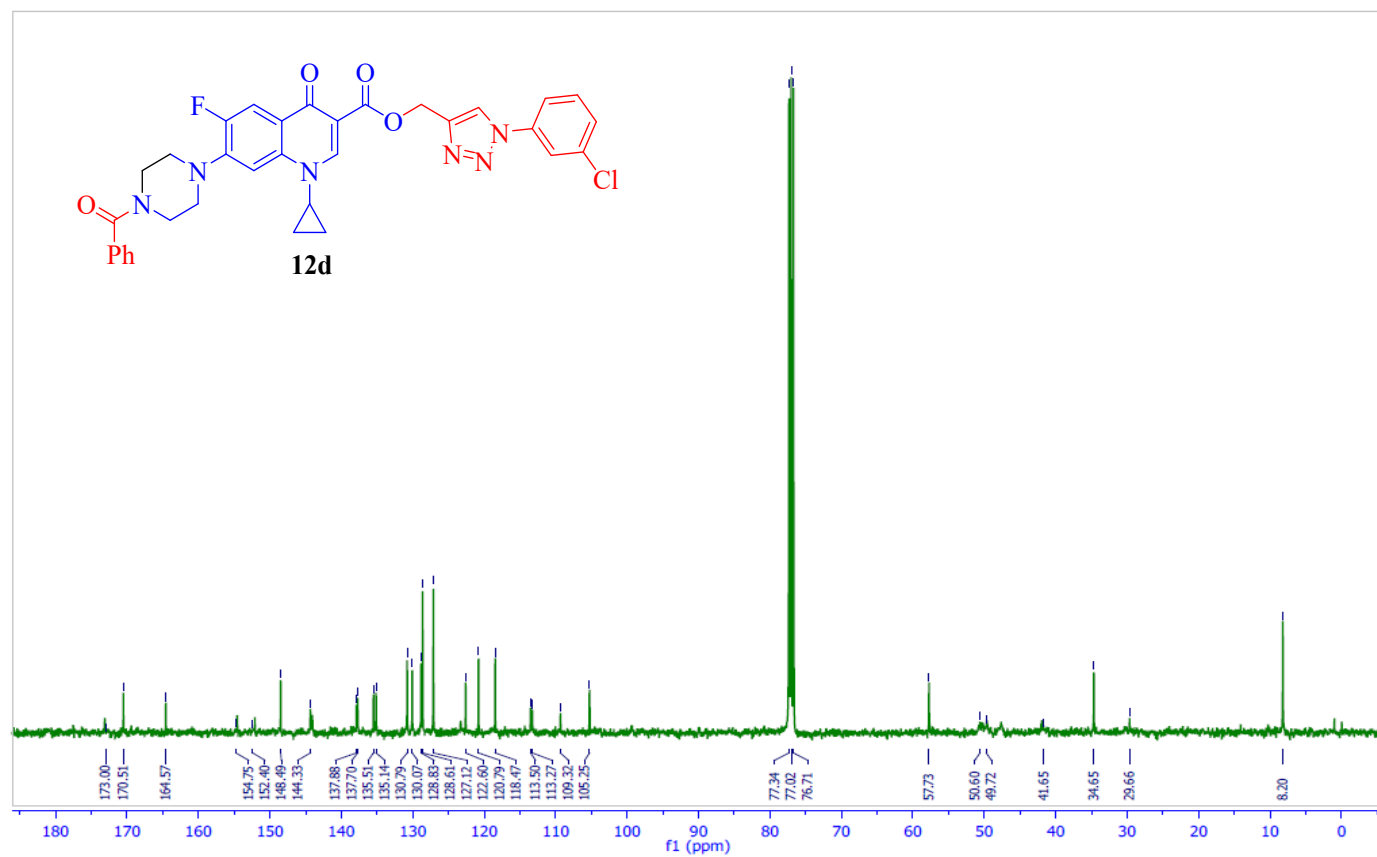

HRMS spectrum of compound **12d**

|                               |              |                      |                        |
|-------------------------------|--------------|----------------------|------------------------|
| <b>Data File</b>              | CPR-30.d     | <b>Sample Name</b>   | CPR-30                 |
| <b>Sample Type</b>            | Sample       | <b>Position</b>      | P1-B8                  |
| <b>Instrument Name</b>        | Instrument 1 | <b>User Name</b>     |                        |
| <b>Acq Method</b>             | MS Scan_02.m | <b>Acquired Time</b> | 08-06-2023<br>13:25:21 |
| <b>IRM Calibration Status</b> | Success      | <b>DA Method</b>     | Default.m              |
| <b>Comment</b>                |              |                      |                        |

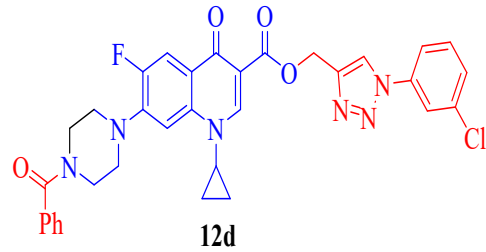

|                               |                                                          |              |   |
|-------------------------------|----------------------------------------------------------|--------------|---|
| <b>Sample Group</b>           |                                                          | <b>Info.</b> | 3 |
| <b>Acquisition SW Version</b> | 6200 series<br>TOF/6500 series Q-<br>TOF B.05.01 (B5125) |              |   |

**Compound Table**

| Compound Label            | RT    | Mass     | Abund | Formula            | Tgt Mass | Diff (ppm) | MFG Formula        | DB Formula         |
|---------------------------|-------|----------|-------|--------------------|----------|------------|--------------------|--------------------|
| Cpd 1: C33 H28 Cl F N6 O4 | 0.095 | 626.1862 | 8348  | C33 H28 Cl F N6 O4 | 626.1845 | 2.76       | C33 H28 Cl F N6 O4 | C33 H28 Cl F N6 O4 |

| Compound Label            | m/z      | RT    | Algorithm       | Mass     |
|---------------------------|----------|-------|-----------------|----------|
| Cpd 1: C33 H28 Cl F N6 O4 | 649.1753 | 0.095 | Find By Formula | 626.1862 |

**MS Zoomed Spectrum**

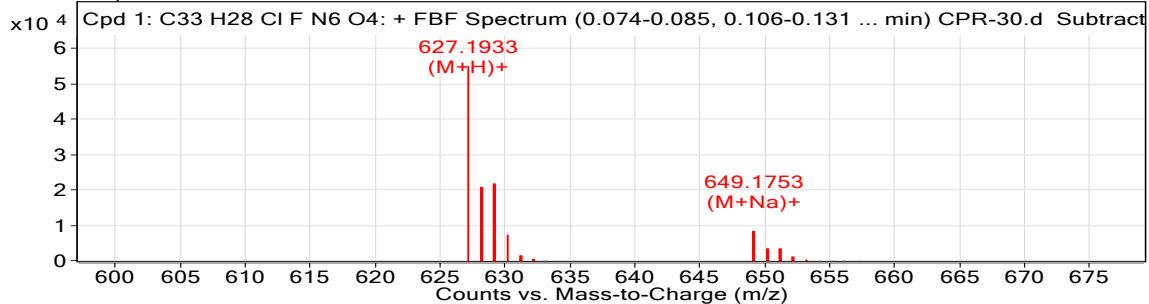

**MS Spectrum Peak List**

| m/z      | z | Abund    | Formula         | Ion     |
|----------|---|----------|-----------------|---------|
| 627.1933 | 1 | 54838.88 | C33H29ClFN6O4   | (M+H)+  |
| 628.1966 | 1 | 20629.42 | C33H29ClFN6O4   | (M+H)+  |
| 629.1926 | 1 | 21348.88 | C33H29ClFN6O4   | (M+H)+  |
| 630.1942 | 1 | 7257.27  | C33H29ClFN6O4   | (M+H)+  |
| 631.1963 | 1 | 1349.39  | C33H29ClFN6O4   | (M+H)+  |
| 632.1986 | 1 | 155.5    | C33H29ClFN6O4   | (M+H)+  |
| 649.1753 | 1 | 8347.58  | C33H28ClFN6NaO4 | (M+Na)+ |
| 650.1781 | 1 | 3174.49  | C33H28ClFN6NaO4 | (M+Na)+ |
| 651.1741 | 1 | 3246.1   | C33H28ClFN6NaO4 | (M+Na)+ |
| 652.1759 | 1 | 1016.01  | C33H28ClFN6NaO4 | (M+Na)+ |
| 653.1795 | 1 | 154.22   | C33H28ClFN6NaO4 | (M+Na)+ |

--- End Of Report ---

<sup>1</sup>H-NMR spectrum of compound **12e**

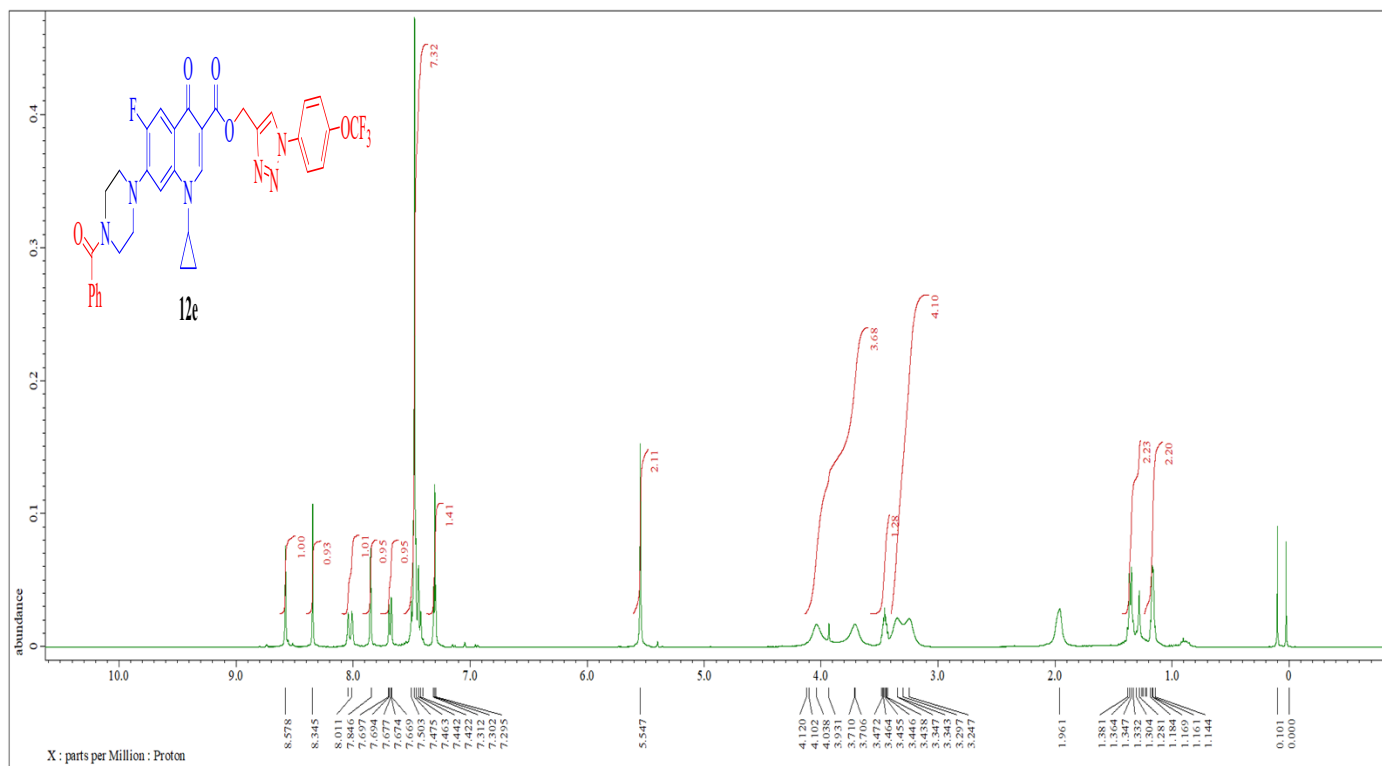

**13C-NMR spectrum of compound 12e**

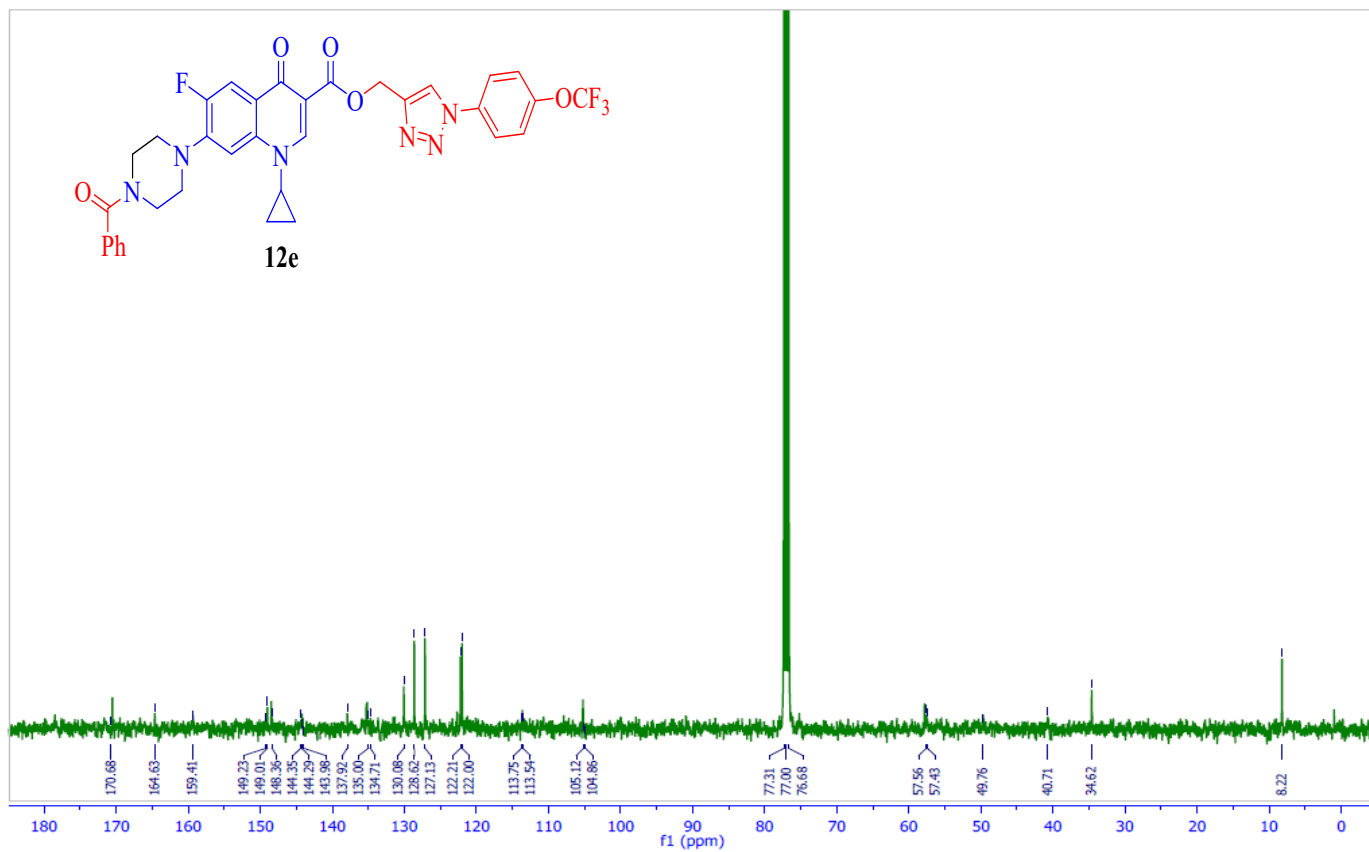

**19F-NMR spectrum of compound 12e**

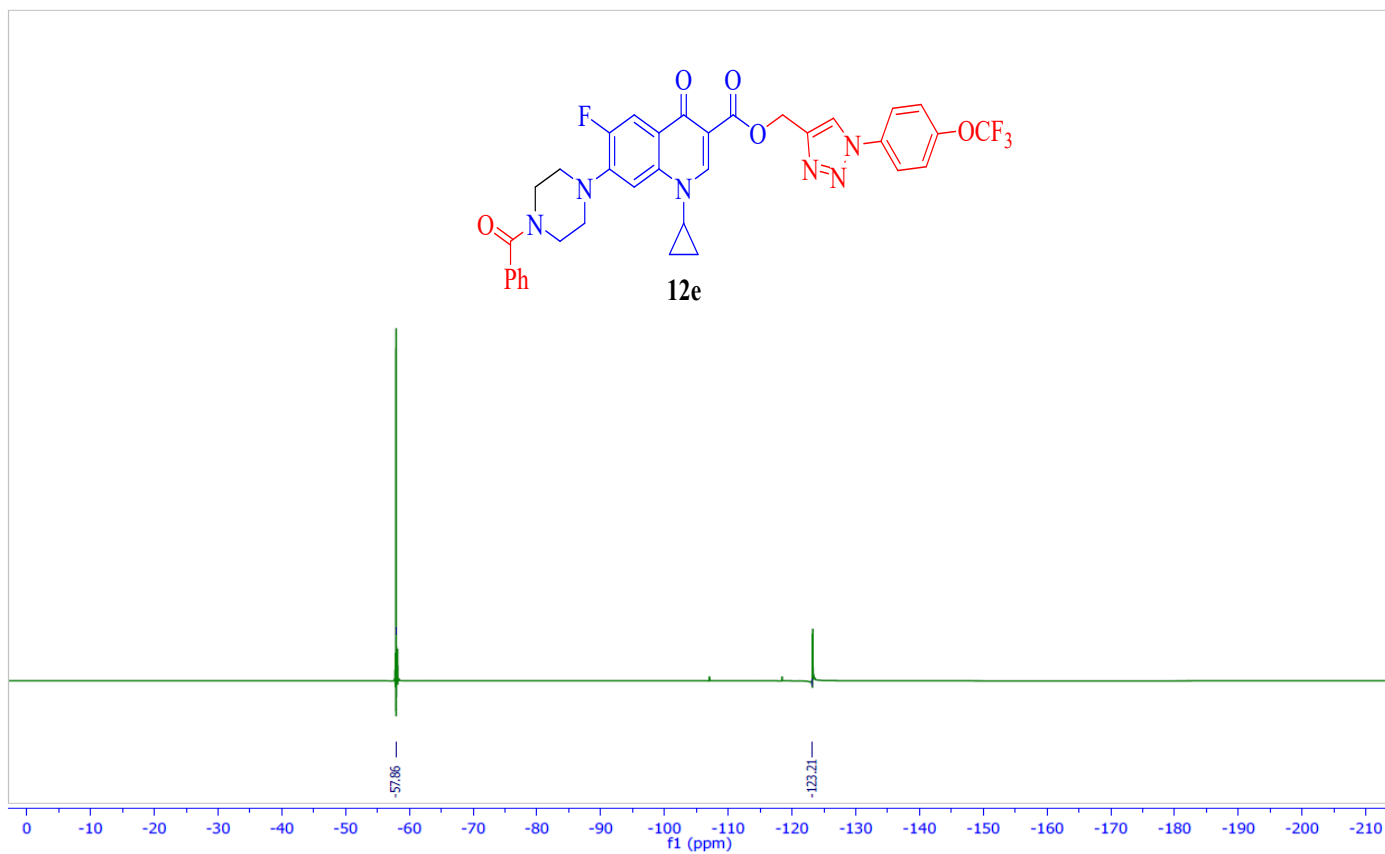

IR spectrum of compound **12e**

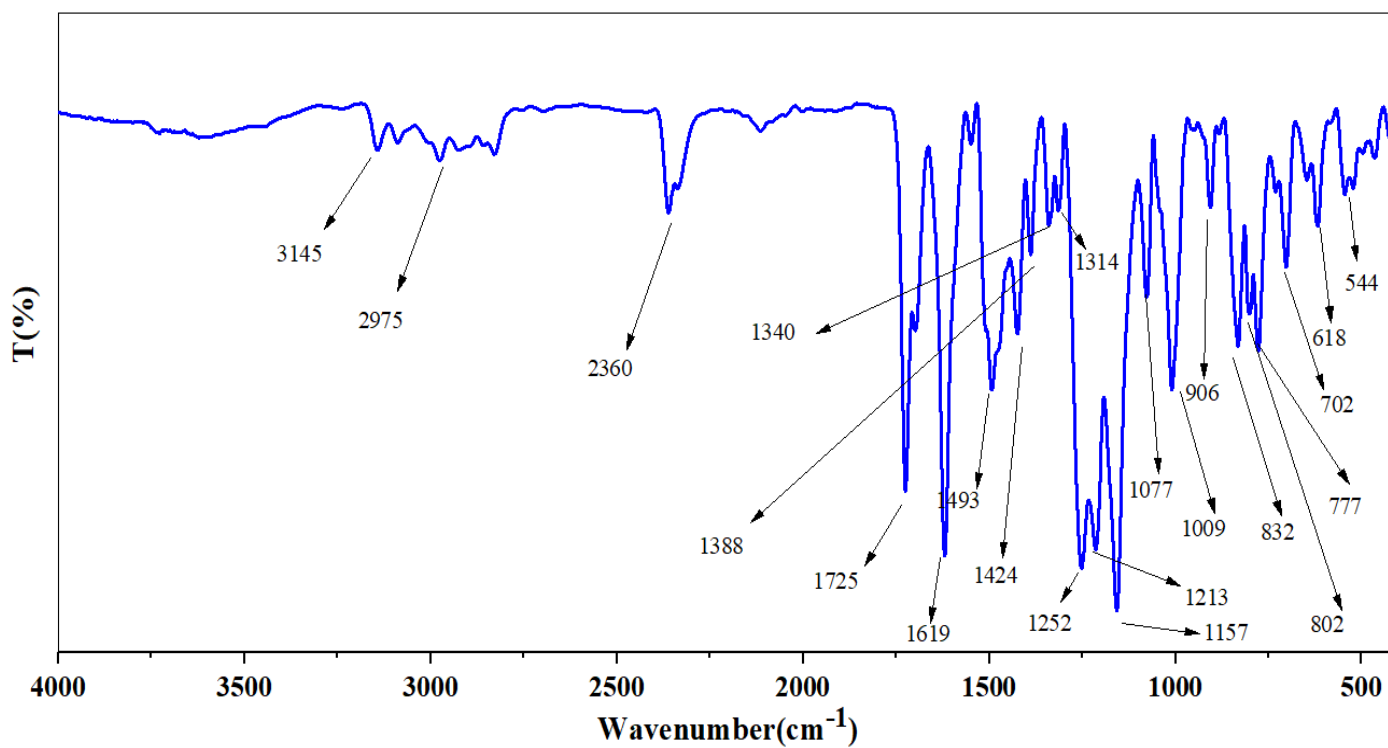

HRMS spectrum of compound **12e**

**Data File** CPR-31.d **Sample Name** CPR-31  
**Sample Type** Sample **Sample Position** P1-B9  
**Instrument Name** Instrument 1 **User Name**  
**Acq Method** MS Scan\_02.m **Acquired Time** 08-06-2023 13:28:50  
**IRM Calibration Status** Success **DA Method** Default.m  
**Comment**

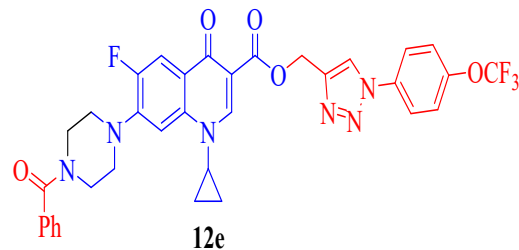

**Sample Group** Info. 3  
**Acquisition SW Version** 6200 series TOF/6500 series Q-TOF B.05.01 (B5125)

### Compound Table

| Compound Label                                                                      | RT  | Mass     | Abund | Formula                                                                      | Tgt Mass | Diff (ppm) | MFG Formula                                                                  | DB Formula                                                                   |
|-------------------------------------------------------------------------------------|-----|----------|-------|------------------------------------------------------------------------------|----------|------------|------------------------------------------------------------------------------|------------------------------------------------------------------------------|
| Cpd 1: C <sub>34</sub> H <sub>28</sub> F <sub>4</sub> N <sub>6</sub> O <sub>5</sub> | 0.1 | 676.2078 | 2543  | C <sub>34</sub> H <sub>28</sub> F <sub>4</sub> N <sub>6</sub> O <sub>5</sub> | 676.2057 | 3.11       | C <sub>34</sub> H <sub>28</sub> F <sub>4</sub> N <sub>6</sub> O <sub>5</sub> | C <sub>34</sub> H <sub>28</sub> F <sub>4</sub> N <sub>6</sub> O <sub>5</sub> |

| Compound Label                                                                      | m/z      | RT  | Algorithm       | Mass     |
|-------------------------------------------------------------------------------------|----------|-----|-----------------|----------|
| Cpd 1: C <sub>34</sub> H <sub>28</sub> F <sub>4</sub> N <sub>6</sub> O <sub>5</sub> | 699.1963 | 0.1 | Find By Formula | 676.2078 |

### MS Zoomed Spectrum

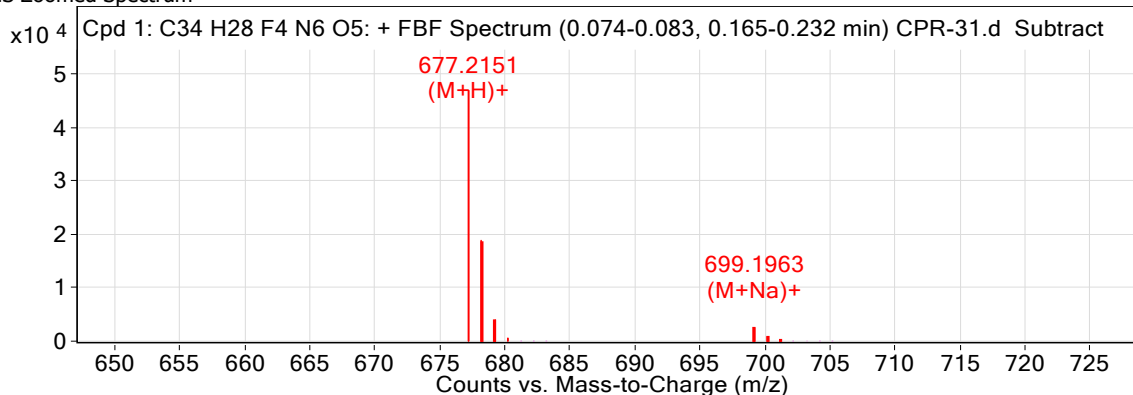

### MS Spectrum Peak List

| m/z      | z | Abund    | Formula                                                                        | Ion                 |
|----------|---|----------|--------------------------------------------------------------------------------|---------------------|
| 677.2151 | 1 | 47100.44 | C <sub>34</sub> H <sub>29</sub> F <sub>4</sub> N <sub>6</sub> O <sub>5</sub>   | (M+H) <sup>+</sup>  |
| 678.2183 | 1 | 18830.41 | C <sub>34</sub> H <sub>29</sub> F <sub>4</sub> N <sub>6</sub> O <sub>5</sub>   | (M+H) <sup>+</sup>  |
| 679.2207 | 1 | 3979.11  | C <sub>34</sub> H <sub>29</sub> F <sub>4</sub> N <sub>6</sub> O <sub>5</sub>   | (M+H) <sup>+</sup>  |
| 680.2232 | 1 | 596.24   | C <sub>34</sub> H <sub>29</sub> F <sub>4</sub> N <sub>6</sub> O <sub>5</sub>   | (M+H) <sup>+</sup>  |
| 699.1963 | 1 | 2543.26  | C <sub>34</sub> H <sub>28</sub> F <sub>4</sub> N <sub>6</sub> NaO <sub>5</sub> | (M+Na) <sup>+</sup> |
| 700.1992 | 1 | 978.64   | C <sub>34</sub> H <sub>28</sub> F <sub>4</sub> N <sub>6</sub> NaO <sub>5</sub> | (M+Na) <sup>+</sup> |
| 701.2016 | 1 | 141.93   | C <sub>34</sub> H <sub>28</sub> F <sub>4</sub> N <sub>6</sub> NaO <sub>5</sub> | (M+Na) <sup>+</sup> |

--- End Of Report ---

<sup>1</sup>H-NMR spectrum of compound **12f**



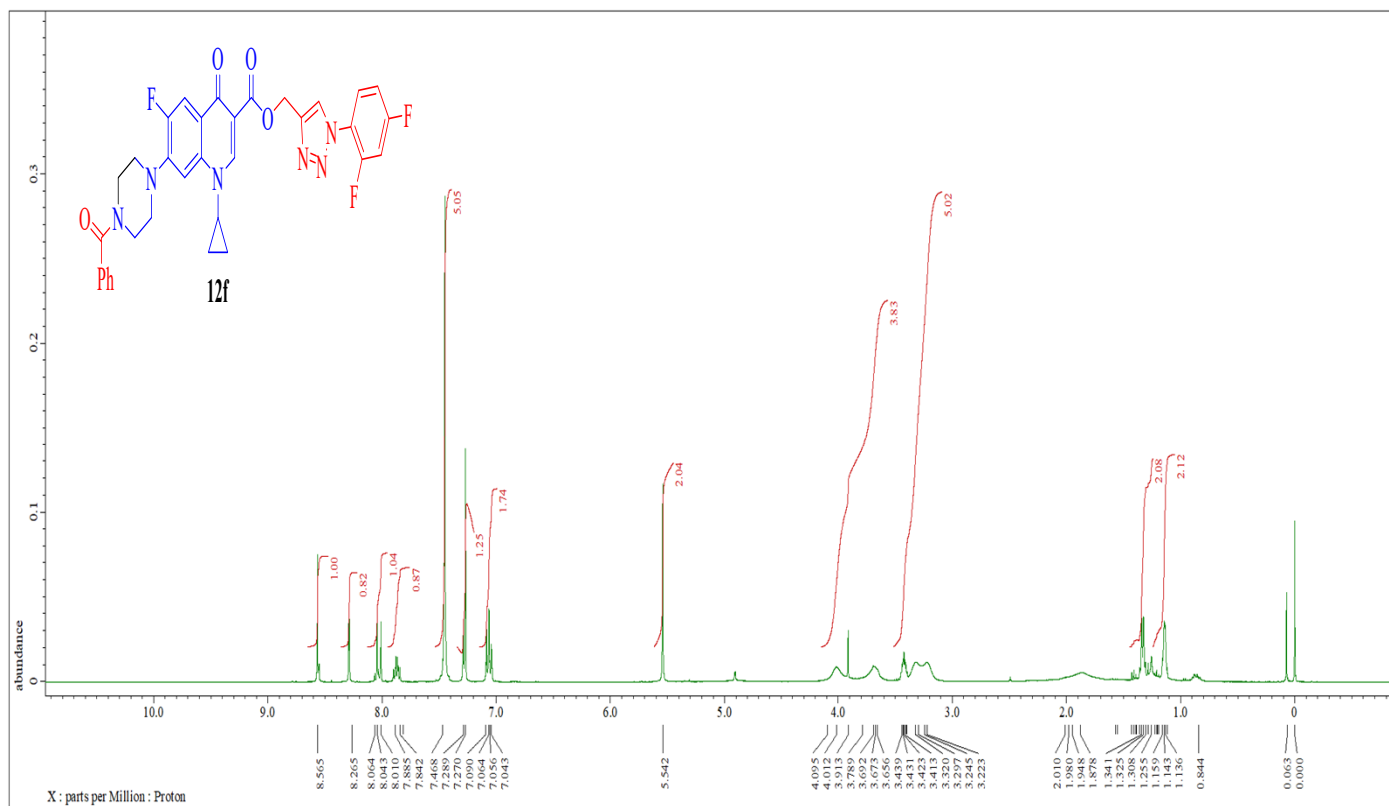

<sup>13</sup>C-NMR spectrum of compound **12f**

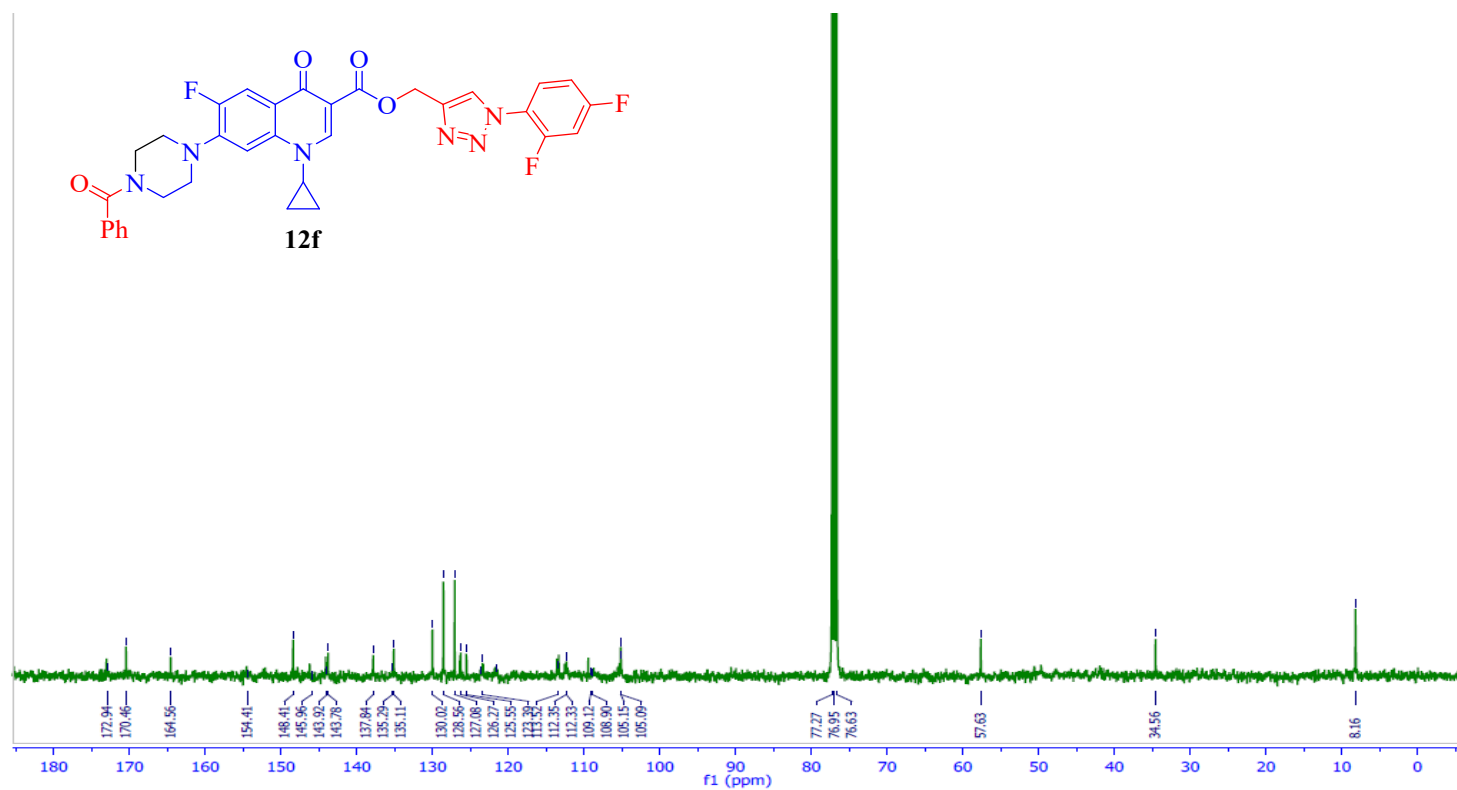

<sup>19</sup>F-NMR spectrum of compound **12f**

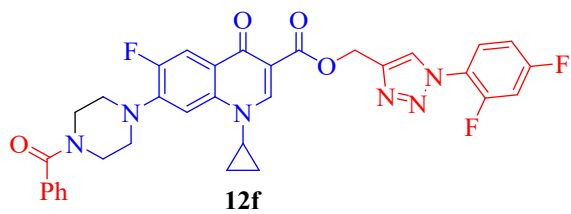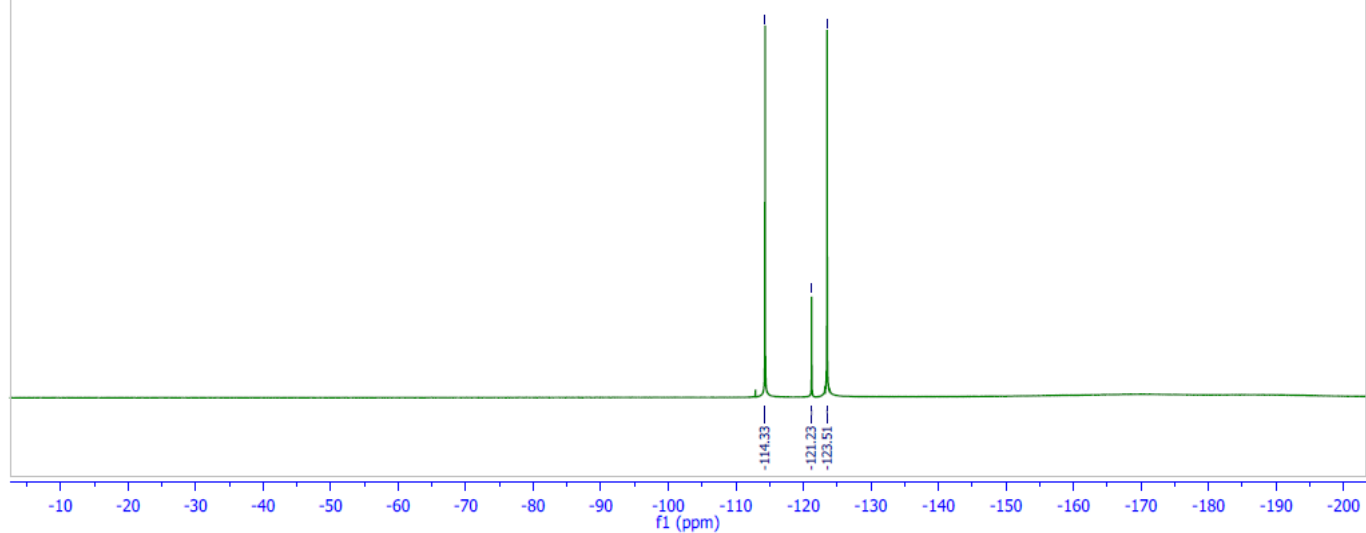

HRMS spectrum of compound **12f**

**Data File** CPR-32.d  
**Sample Type** Sample  
**Instrument Name** Instrument 1  
**Acq Method** MS Scan\_02.m  
**IRM Calibration Status** Success  
**Comment**

**Sample Name** CPR-32  
**Position** P1-C1  
**User Name**  
**Acquired Time** 08-06-2023 13:30:51  
**DA Method** Default.m

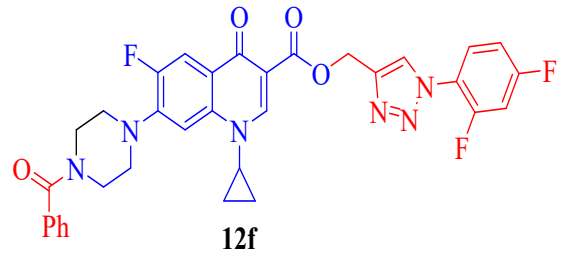

**Sample Group** Info. 3  
**Acquisition SW Version** 6200 series TOF/6500 series Q-TOF B.05.01 (B5125)

### Compound Table

| Compound Label          | RT    | Mass     | Abund | Formula          | Tgt Mass | Diff (ppm) | MFG Formula      | DB Formula       |
|-------------------------|-------|----------|-------|------------------|----------|------------|------------------|------------------|
| Cpd 1: C33 H27 F3 N6 O4 | 0.097 | 628.2067 | 4866  | C33 H27 F3 N6 O4 | 628.2046 | 3.32       | C33 H27 F3 N6 O4 | C33 H27 F3 N6 O4 |

| Compound Label          | m/z      | RT    | Algorithm       | Mass     |
|-------------------------|----------|-------|-----------------|----------|
| Cpd 1: C33 H27 F3 N6 O4 | 651.1955 | 0.097 | Find By Formula | 628.2067 |

### MS Zoomed Spectrum

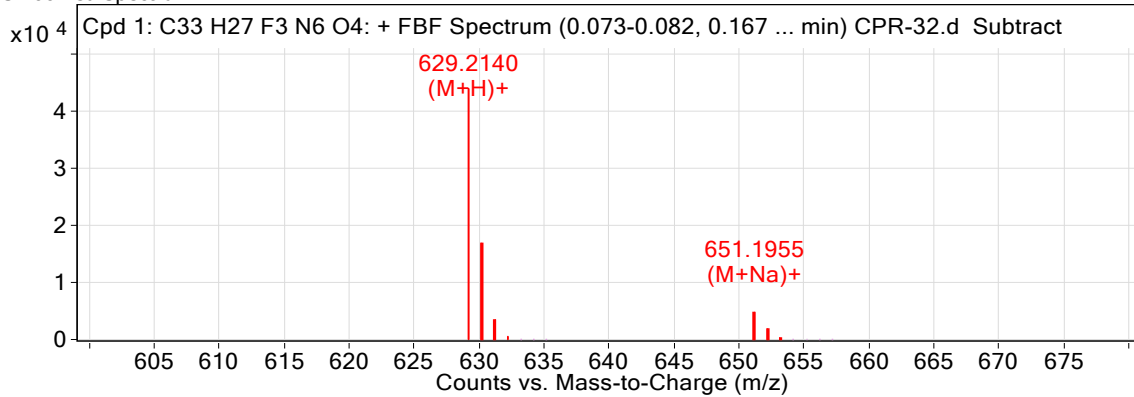

### MS Spectrum Peak List

| m/z      | z | Abund    | Formula        | Ion     |
|----------|---|----------|----------------|---------|
| 629.214  | 1 | 44055.39 | C33H28F3N6O4   | (M+H)+  |
| 630.2172 | 1 | 16910.61 | C33H28F3N6O4   | (M+H)+  |
| 631.2194 | 1 | 3342.13  | C33H28F3N6O4   | (M+H)+  |
| 632.2217 | 1 | 458.13   | C33H28F3N6O4   | (M+H)+  |
| 651.1955 | 1 | 4865.95  | C33H27F3N6NaO4 | (M+Na)+ |
| 652.1982 | 1 | 1723.25  | C33H27F3N6NaO4 | (M+Na)+ |
| 653.2012 | 1 | 289.33   | C33H27F3N6NaO4 | (M+Na)+ |

--- End Of Report ---
